# Supplementary material
Source: publisher figshare collection journal article supplement (https://tandf.figshare.com/ndownloader/files/13595159)
Supplement: Supplementary file 1 [file 13595159]

Supplementary Data for

**Theoretical Investigation on Electronic Structure and Stability of
Some Inverted Cucurbiturils by Density Functional Theory**

Kye-Ryong Sin*, Sun-Gyong Ko, Chol-Jin Kim, Hyon-Chol Kim, and Mun-Ho So

Department of Chemistry, **Kim Il Sung** University, Ryongnam-Dong, Taesong District,

Pyongyang, Democratic People’s Republic of Korea

* Corresponding author. E-mail: [gr.sin@ryongnamsan.edu.kp](mailto:gr.sin@ryongnamsan.edu.kp)

Geometric and Electronic structures of the inverted cucurbit[n:5-10]urils

**Table S1. Coordinates of CB[5**]

| No | Atom | Coordinates | | | Atomic charge |
| --- | --- | --- | --- | --- | --- |
| X(nm) | Y(nm) | Z(nm) |
| 1 | C | 0.0000000 | 0.0000000 | 0.0000000 | 0.148758 |
| 2 | C | 0.1571486 | 0.0000000 | 0.0000000 | 0.165414 |
| 3 | N | 0.145069 | 10.3229941 | 0.0000000 | -0.449283 |
| 4 | C | 0.1395101 | 11.2240543 | 34.924625 | 0.596049 |
| 5 | N | 0.1443299 | 10.3218855 | 0.9243604 | -0.455664 |
| 6 | N | 0.145091 | 10.3206146 | 24.6426076 | -0.448260 |
| 7 | C | 0.1394333 | 11.231447 | 34.9235754 | 0.595691 |
| 8 | N | 0.1444001 | 10.3229267 | 13.2164405 | -0.458176 |
| 9 | O | 0.1211165 | 12.644724 | 19.0706407 | -0.345202 |
| 10 | O | 0.1211117 | 12.6484656 | 19.0592732 | -0.345516 |
| 11 | C | 0.1450727 | 12.4645849 | 18.8978896 | 0.062927 |
| 12 | C | 0.1445796 | 12.546913 | 18.6275414 | 0.066857 |
| 13 | C | 0.5119421 | 2.566677 | 30.3081601 | 0.169310 |
| 14 | C | 0.1572729 | 13.3362927 | 17.9623941 | 0.169995 |
| 15 | N | 0.1450303 | 10.3308457 | 30.1292985 | -0.444969 |
| 16 | C | 0.1393807 | 11.2448354 | 35.1011184 | 0.583569 |
| 17 | N | 0.1445256 | 11.5172186 | 26.6147008 | -0.453890 |
| 18 | N | 0.1450727 | 11.5260076 | 7.7077168 | -0.444735 |
| 19 | C | 0.1394343 | 12.0316818 | 10.558314 | 0.583897 |
| 20 | N | 0.1444239 | 10.3211487 | 13.0353844 | -0.454382 |
| 21 | O | 0.1211324 | 12.6464715 | 18.9829566 | -0.342061 |
| 22 | O | 0.1211307 | 12.6455117 | 35.3364815 | -0.342085 |
| 23 | C | 0.1450188 | 12.4983275 | 18.7516228 | 0.067202 |
| 24 | C | 0.144539 | 12.5683519 | 18.5291757 | 0.063644 |
| 25 | C | 0.8265369 | 6.1852524 | 30.3607343 | 0.163939 |
| 26 | C | 0.1571949 | 9.7193516 | 17.8891069 | 0.149242 |
| 27 | N | 0.1450683 | 10.3214575 | 30.3002425 | -0.448467 |
| 28 | C | 0.1394369 | 11.2323638 | 34.9352796 | 0.596123 |
| 29 | N | 0.1445977 | 11.5274633 | 26.7558122 | -0.458078 |
| 30 | N | 0.144994 | 11.5140129 | 7.8315408 | -0.449197 |
| 31 | C | 0.1394346 | 12.0221271 | 10.6721392 | 0.596291 |
| 32 | N | 0.1443425 | 10.323619 | 13.1868702 | -0.456462 |
| 33 | O | 0.1211175 | 12.6478127 | 19.070516 | -0.345572 |
| 34 | O | 0.1211254 | 12.6445371 | 35.3167851 | -0.345272 |
| 35 | C | 0.145017 | 12.4743737 | 18.8060133 | 0.068490 |
| 36 | C | 0.1445743 | 12.5544238 | 18.4342506 | 0.071221 |
| 37 | C | 0.82622 | 9.7951332 | 30.4093475 | 0.162529 |
| 38 | C | 0.1570733 | 6.2214034 | 17.9662129 | 0.166802 |
| 39 | N | 0.1451451 | 10.3343484 | 30.4385833 | -0.446347 |
| 40 | C | 0.1395723 | 11.2094192 | 34.9141011 | 0.591064 |
| 41 | N | 0.1445088 | 11.51611 | 26.7664113 | -0.453155 |
| 42 | N | 0.1450502 | 11.523319 | 7.8692376 | -0.445336 |
| 43 | C | 0.1394578 | 12.0374293 | 10.7597445 | 0.589002 |
| 44 | N | 0.1444012 | 10.3253138 | 13.19641 | -0.452977 |
| 45 | O | 0.1211053 | 12.641488 | 19.1141177 | -0.343644 |
| 46 | O | 0.1211031 | 12.647746 | 35.3083866 | -0.344030 |
| 47 | C | 0.1452577 | 12.448035 | 19.0191906 | 0.050074 |
| 48 | C | 0.1445679 | 12.5175082 | 18.8552852 | 0.049688 |
| 49 | C | 0.5120963 | 13.4115234 | 30.4223107 | 0.165891 |
| 50 | C | 0.1570463 | 2.5308326 | 17.9878061 | 0.163688 |
| 51 | N | 0.1451001 | 10.3266277 | 30.2000267 | -0.445763 |
| 52 | C | 0.1394434 | 11.2297074 | 34.9627537 | 0.589638 |
| 53 | N | 0.1445734 | 11.519076 | 26.3934211 | -0.453397 |
| 54 | N | 0.1452627 | 11.5194973 | 7.5275017 | -0.446536 |
| 55 | C | 0.1395836 | 12.0019465 | 10.6471233 | 0.591915 |
| 56 | N | 0.14431 | 10.3208773 | 13.2020713 | -0.453997 |
| 57 | O | 0.121107 | 12.6488395 | 19.0323269 | -0.344179 |
| 58 | O | 0.1211032 | 12.6423276 | 35.0996347 | -0.343852 |
| 59 | C | 0.1445789 | 12.5496982 | 18.404336 | 0.070367 |
| 60 | C | 0.1450138 | 12.475875 | 18.7688292 | 0.069401 |
| 61 | H | 0.1100294 | 11.2865708 | 12.7875051 | 0.142197 |
| 62 | H | 0.1100425 | 11.2858657 | 25.0617011 | 0.138652 |
| 63 | H | 0.1092432 | 10.6874873 | 14.8361744 | 0.175500 |
| 64 | H | 0.1098008 | 10.9263222 | 2.9313128 | 0.115397 |
| 65 | H | 0.1092337 | 10.6344494 | 19.5392455 | 0.174630 |
| 66 | H | 0.1097837 | 10.8944847 | 31.3910479 | 0.114422 |
| 67 | H | 0.1100208 | 11.2746324 | 12.5827633 | 0.134325 |
| 68 | H | 0.1100251 | 11.2779715 | 24.8851744 | 0.134222 |
| 69 | H | 0.1092352 | 10.6890765 | 14.9554249 | 0.174345 |
| 70 | H | 0.1097859 | 10.9266126 | 3.0554093 | 0.114578 |
| 71 | H | 0.109809 | 10.9032864 | 31.5052106 | 0.115427 |
| 72 | H | 0.1092467 | 10.6406933 | 19.6412442 | 0.175155 |
| 73 | H | 0.1100394 | 11.2898495 | 12.7509054 | 0.139163 |
| 74 | H | 0.1100312 | 11.2870649 | 25.0513723 | 0.142328 |
| 75 | H | 0.1098264 | 10.9366357 | 3.0572019 | 0.113676 |
| 76 | H | 0.1092438 | 10.6783952 | 14.9578298 | 0.174742 |
| 77 | H | 0.1092309 | 10.6528833 | 19.6885951 | 0.173962 |
| 78 | H | 0.1098023 | 10.8735733 | 31.5530308 | 0.112776 |
| 79 | H | 0.110042 | 11.2887099 | 12.7482273 | 0.136981 |
| 80 | H | 0.1100303 | 11.277963 | 25.0476216 | 0.136191 |
| 81 | H | 0.1092428 | 10.7079719 | 14.5834216 | 0.180453 |
| 82 | H | 0.1097773 | 10.9153979 | 2.6872082 | 0.117051 |
| 83 | H | 0.1097784 | 10.8972013 | 31.2274491 | 0.117024 |
| 84 | H | 0.1092447 | 10.6409567 | 19.3782461 | 0.180530 |
| 85 | H | 0.1100274 | 11.2802408 | 12.7618045 | 0.136603 |
| 86 | H | 0.1100394 | 11.2893786 | 25.0554758 | 0.136706 |
| 87 | H | 0.1097929 | 10.8665079 | 31.6008848 | 0.113039 |
| 88 | H | 0.1092333 | 10.6616125 | 19.736372 | 0.173860 |
| 89 | H | 0.1092417 | 10.6805216 | 14.9776058 | 0.174480 |
| 90 | H | 0.1098212 | 10.9359087 | 3.0790901 | 0.113389 |

Table S2. Coordinates of i-CB[5]

| No | Atom | Coordinates | | | Atomic charge |
| --- | --- | --- | --- | --- | --- |
| X(nm) | Y(nm) | Z(nm) |
| 1 | C | 0.0000000 | 0.0000000 | 0.0000000 | 0.162100 |
| 2 | C | 0.153584 | 0.0000000 | 0.0000000 | 0.162447 |
| 3 | N | 0.145322 | 10.33869 | 0.0000000 | -0.462298 |
| 4 | C | 0.139788 | 11.14701 | 1.371967 | 0.583796 |
| 5 | N | 0.143746 | 10.35078 | 34.55718 | -0.473971 |
| 6 | N | 0.145326 | 10.33806 | 10.67079 | -0.462381 |
| 7 | C | 0.139786 | 11.14744 | 1.370573 | 0.583830 |
| 8 | N | 0.143742 | 10.35147 | 22.44383 | -0.473716 |
| 9 | O | 0.121637 | 12.64235 | 17.34582 | -0.381198 |
| 10 | O | 0.121637 | 12.64207 | 17.34728 | -0.381192 |
| 11 | C | 0.146119 | 12.08985 | 16.83588 | 0.114137 |
| 12 | C | 0.145402 | 12.13488 | 17.84019 | 0.131712 |
| 13 | C | 0.480268 | 0.515178 | 24.07189 | 0.170031 |
| 14 | C | 0.157735 | 11.17501 | 18.49334 | 0.137256 |
| 15 | N | 0.14551 | 10.32865 | 30.67328 | -0.446108 |
| 16 | C | 0.139183 | 11.25608 | 35.18261 | 0.574904 |
| 17 | N | 0.144787 | 11.22586 | 33.77616 | -0.485147 |
| 18 | N | 0.144572 | 11.0597 | 3.928639 | -0.490139 |
| 19 | C | 0.138989 | 12.00054 | 8.224038 | 0.587593 |
| 20 | N | 0.144786 | 10.35691 | 12.98711 | -0.449894 |
| 21 | O | 0.121272 | 12.67413 | 18.6878 | -0.346595 |
| 22 | O | 0.121167 | 12.59457 | 1.016619 | -0.346620 |
| 23 | C | 0.145325 | 12.53941 | 18.79455 | 0.071652 |
| 24 | C | 0.144819 | 12.58381 | 18.75669 | 0.074205 |
| 25 | C | 0.675187 | 5.438594 | 23.48063 | 0.165557 |
| 26 | C | 0.157004 | 8.882149 | 18.28367 | 0.163563 |
| 27 | N | 0.145042 | 10.34033 | 30.31888 | -0.447767 |
| 28 | C | 0.139461 | 11.24253 | 35.14583 | 0.589688 |
| 29 | N | 0.144391 | 11.53047 | 26.59312 | -0.456655 |
| 30 | N | 0.14516 | 11.53757 | 7.709291 | -0.452787 |
| 31 | C | 0.139679 | 12.06379 | 10.60945 | 0.588980 |
| 32 | N | 0.144374 | 10.31799 | 12.96873 | -0.455598 |
| 33 | O | 0.121116 | 12.64001 | 18.93181 | -0.343666 |
| 34 | O | 0.121091 | 12.65704 | 35.2125 | -0.343487 |
| 35 | C | 0.145151 | 12.45092 | 18.97035 | 0.053561 |
| 36 | C | 0.144513 | 12.54548 | 18.40267 | 0.054053 |
| 37 | C | 0.647104 | 9.985365 | 23.25707 | 0.163971 |
| 38 | C | 0.156982 | 6.540042 | 18.26735 | 0.165203 |
| 39 | N | 0.145079 | 10.35304 | 30.19864 | -0.452784 |
| 40 | C | 0.139683 | 11.21464 | 35.04307 | 0.588798 |
| 41 | N | 0.144528 | 11.5218 | 26.73734 | -0.455396 |
| 42 | N | 0.145156 | 11.52061 | 7.754724 | -0.447835 |
| 43 | C | 0.139458 | 12.047 | 10.71941 | 0.589382 |
| 44 | N | 0.144339 | 10.32897 | 13.00101 | -0.456318 |
| 45 | O | 0.12109 | 12.65587 | 19.05442 | -0.343445 |
| 46 | O | 0.121113 | 12.64012 | 35.17027 | -0.343603 |
| 47 | C | 0.145193 | 12.42615 | 19.0165 | 0.074638 |
| 48 | C | 0.144391 | 12.50079 | 18.55677 | 0.071561 |
| 49 | C | 0.417792 | 15.23321 | 22.96956 | 0.137265 |
| 50 | C | 0.157721 | 4.564981 | 18.14317 | 0.169423 |
| 51 | N | 0.145883 | 10.2714 | 29.7178 | -0.490110 |
| 52 | C | 0.13898 | 11.30595 | 35.52623 | 0.587688 |
| 53 | N | 0.14482 | 11.53683 | 26.50946 | -0.450213 |
| 54 | N | 0.145354 | 11.5312 | 7.731569 | -0.446095 |
| 55 | C | 0.139209 | 12.00109 | 10.34096 | 0.575077 |
| 56 | N | 0.145447 | 10.29531 | 13.00779 | -0.485209 |
| 57 | O | 0.121165 | 12.59454 | 18.3488 | -0.346665 |
| 58 | O | 0.12127 | 12.67402 | 35.12969 | -0.346608 |
| 59 | C | 0.14541 | 12.13572 | 17.84436 | 0.132262 |
| 60 | C | 0.146117 | 12.0901 | 16.83319 | 0.114607 |
| 61 | H | 0.109265 | 11.21945 | 22.62616 | 0.159393 |
| 62 | H | 0.109262 | 11.21684 | 10.51068 | 0.159199 |
| 63 | H | 0.109241 | 10.75332 | 21.73812 | 0.165996 |
| 64 | H | 0.10964 | 11.08784 | 9.841233 | 0.129353 |
| 65 | H | 0.109147 | 10.76456 | 15.86672 | 0.164721 |
| 66 | H | 0.109902 | 11.17845 | 27.83248 | 0.125652 |
| 67 | H | 0.109671 | 11.30649 | 12.54708 | 0.153586 |
| 68 | H | 0.109894 | 11.27344 | 24.88159 | 0.150045 |
| 69 | H | 0.109231 | 10.69563 | 14.78227 | 0.174297 |
| 70 | H | 0.109736 | 10.88978 | 2.888502 | 0.119722 |
| 71 | H | 0.109736 | 10.88617 | 31.38867 | 0.116238 |
| 72 | H | 0.109222 | 10.63281 | 19.54157 | 0.174552 |
| 73 | H | 0.110024 | 11.29286 | 12.55794 | 0.138677 |
| 74 | H | 0.110024 | 11.29221 | 24.83186 | 0.139702 |
| 75 | H | 0.109824 | 10.90355 | 3.021957 | 0.119759 |
| 76 | H | 0.109244 | 10.70641 | 14.909 | 0.180867 |
| 77 | H | 0.109245 | 10.65527 | 19.61243 | 0.180796 |
| 78 | H | 0.109827 | 10.89652 | 31.46725 | 0.119653 |
| 79 | H | 0.110023 | 11.293 | 12.59877 | 0.139522 |
| 80 | H | 0.110021 | 11.29192 | 24.86769 | 0.138727 |
| 81 | H | 0.109222 | 10.69317 | 14.70807 | 0.174564 |
| 82 | H | 0.109732 | 10.92314 | 2.807274 | 0.116138 |
| 83 | H | 0.109732 | 10.90747 | 31.44684 | 0.119725 |
| 84 | H | 0.109231 | 10.64168 | 19.57445 | 0.174358 |
| 85 | H | 0.109893 | 11.27235 | 12.53048 | 0.150116 |
| 86 | H | 0.10967 | 11.30732 | 24.81462 | 0.153867 |
| 87 | H | 0.109901 | 11.17658 | 27.82436 | 0.125584 |
| 88 | H | 0.109147 | 10.7652 | 15.85798 | 0.164612 |
| 89 | H | 0.10924 | 10.75383 | 21.74188 | 0.165881 |
| 90 | H | 0.10964 | 11.08737 | 9.844446 | 0.129258 |

**Table S3. Coordinates of i(1,3)-CB[5]**

| No | Atom | Coordinates | | | Atomic charge |
| --- | --- | --- | --- | --- | --- |
| X(nm) | Y(nm) | Z(nm) |
| 1 | C | 0.0000000 | 0.0000000 | 0.0000000 | 0.148758 |
| 2 | C | 0.1571486 | 0.0000000 | 0.0000000 | 0.165414 |
| 3 | N | 0.145069 | 10.3229941 | 0.0000000 | -0.449283 |
| 4 | C | 0.1395101 | 11.2240543 | 34.924625 | 0.596049 |
| 5 | N | 0.1443299 | 10.3218855 | 0.9243604 | -0.455664 |
| 6 | N | 0.145091 | 10.3206146 | 24.6426076 | -0.448260 |
| 7 | C | 0.1394333 | 11.231447 | 34.9235754 | 0.595691 |
| 8 | N | 0.1444001 | 10.3229267 | 13.2164405 | -0.458176 |
| 9 | O | 0.1211165 | 12.644724 | 19.0706407 | -0.345202 |
| 10 | O | 0.1211117 | 12.6484656 | 19.0592732 | -0.345516 |
| 11 | C | 0.1450727 | 12.4645849 | 18.8978896 | 0.062927 |
| 12 | C | 0.1445796 | 12.546913 | 18.6275414 | 0.066857 |
| 13 | C | 0.5119421 | 2.566677 | 30.3081601 | 0.169310 |
| 14 | C | 0.1572729 | 13.3362927 | 17.9623941 | 0.169995 |
| 15 | N | 0.1450303 | 10.3308457 | 30.1292985 | -0.444969 |
| 16 | C | 0.1393807 | 11.2448354 | 35.1011184 | 0.583569 |
| 17 | N | 0.1445256 | 11.5172186 | 26.6147008 | -0.453890 |
| 18 | N | 0.1450727 | 11.5260076 | 7.7077168 | -0.444735 |
| 19 | C | 0.1394343 | 12.0316818 | 10.558314 | 0.583897 |
| 20 | N | 0.1444239 | 10.3211487 | 13.0353844 | -0.454382 |
| 21 | O | 0.1211324 | 12.6464715 | 18.9829566 | -0.342061 |
| 22 | O | 0.1211307 | 12.6455117 | 35.3364815 | -0.342085 |
| 23 | C | 0.1450188 | 12.4983275 | 18.7516228 | 0.067202 |
| 24 | C | 0.144539 | 12.5683519 | 18.5291757 | 0.063644 |
| 25 | C | 0.8265369 | 6.1852524 | 30.3607343 | 0.163939 |
| 26 | C | 0.1571949 | 9.7193516 | 17.8891069 | 0.149242 |
| 27 | N | 0.1450683 | 10.3214575 | 30.3002425 | -0.448467 |
| 28 | C | 0.1394369 | 11.2323638 | 34.9352796 | 0.596123 |
| 29 | N | 0.1445977 | 11.5274633 | 26.7558122 | -0.458078 |
| 30 | N | 0.144994 | 11.5140129 | 7.8315408 | -0.449197 |
| 31 | C | 0.1394346 | 12.0221271 | 10.6721392 | 0.596291 |
| 32 | N | 0.1443425 | 10.323619 | 13.1868702 | -0.456462 |
| 33 | O | 0.1211175 | 12.6478127 | 19.070516 | -0.345572 |
| 34 | O | 0.1211254 | 12.6445371 | 35.3167851 | -0.345272 |
| 35 | C | 0.145017 | 12.4743737 | 18.8060133 | 0.068490 |
| 36 | C | 0.1445743 | 12.5544238 | 18.4342506 | 0.071221 |
| 37 | C | 0.82622 | 9.7951332 | 30.4093475 | 0.162529 |
| 38 | C | 0.1570733 | 6.2214034 | 17.9662129 | 0.166802 |
| 39 | N | 0.1451451 | 10.3343484 | 30.4385833 | -0.446347 |
| 40 | C | 0.1395723 | 11.2094192 | 34.9141011 | 0.591064 |
| 41 | N | 0.1445088 | 11.51611 | 26.7664113 | -0.453155 |
| 42 | N | 0.1450502 | 11.523319 | 7.8692376 | -0.445336 |
| 43 | C | 0.1394578 | 12.0374293 | 10.7597445 | 0.589002 |
| 44 | N | 0.1444012 | 10.3253138 | 13.19641 | -0.452977 |
| 45 | O | 0.1211053 | 12.641488 | 19.1141177 | -0.343644 |
| 46 | O | 0.1211031 | 12.647746 | 35.3083866 | -0.344030 |
| 47 | C | 0.1452577 | 12.448035 | 19.0191906 | 0.050074 |
| 48 | C | 0.1445679 | 12.5175082 | 18.8552852 | 0.049688 |
| 49 | C | 0.5120963 | 13.4115234 | 30.4223107 | 0.165891 |
| 50 | C | 0.1570463 | 2.5308326 | 17.9878061 | 0.163688 |
| 51 | N | 0.1451001 | 10.3266277 | 30.2000267 | -0.445763 |
| 52 | C | 0.1394434 | 11.2297074 | 34.9627537 | 0.589638 |
| 53 | N | 0.1445734 | 11.519076 | 26.3934211 | -0.453397 |
| 54 | N | 0.1452627 | 11.5194973 | 7.5275017 | -0.446536 |
| 55 | C | 0.1395836 | 12.0019465 | 10.6471233 | 0.591915 |
| 56 | N | 0.14431 | 10.3208773 | 13.2020713 | -0.453997 |
| 57 | O | 0.121107 | 12.6488395 | 19.0323269 | -0.344179 |
| 58 | O | 0.1211032 | 12.6423276 | 35.0996347 | -0.343852 |
| 59 | C | 0.1445789 | 12.5496982 | 18.404336 | 0.070367 |
| 60 | C | 0.1450138 | 12.475875 | 18.7688292 | 0.069401 |
| 61 | H | 0.1100294 | 11.2865708 | 12.7875051 | 0.142197 |
| 62 | H | 0.1100425 | 11.2858657 | 25.0617011 | 0.138652 |
| 63 | H | 0.1092432 | 10.6874873 | 14.8361744 | 0.175500 |
| 64 | H | 0.1098008 | 10.9263222 | 2.9313128 | 0.115397 |
| 65 | H | 0.1092337 | 10.6344494 | 19.5392455 | 0.174630 |
| 66 | H | 0.1097837 | 10.8944847 | 31.3910479 | 0.114422 |
| 67 | H | 0.1100208 | 11.2746324 | 12.5827633 | 0.134325 |
| 68 | H | 0.1100251 | 11.2779715 | 24.8851744 | 0.134222 |
| 69 | H | 0.1092352 | 10.6890765 | 14.9554249 | 0.174345 |
| 70 | H | 0.1097859 | 10.9266126 | 3.0554093 | 0.114578 |
| 71 | H | 0.109809 | 10.9032864 | 31.5052106 | 0.115427 |
| 72 | H | 0.1092467 | 10.6406933 | 19.6412442 | 0.175155 |
| 73 | H | 0.1100394 | 11.2898495 | 12.7509054 | 0.139163 |
| 74 | H | 0.1100312 | 11.2870649 | 25.0513723 | 0.142328 |
| 75 | H | 0.1098264 | 10.9366357 | 3.0572019 | 0.113676 |
| 76 | H | 0.1092438 | 10.6783952 | 14.9578298 | 0.174742 |
| 77 | H | 0.1092309 | 10.6528833 | 19.6885951 | 0.173962 |
| 78 | H | 0.1098023 | 10.8735733 | 31.5530308 | 0.112776 |
| 79 | H | 0.110042 | 11.2887099 | 12.7482273 | 0.136981 |
| 80 | H | 0.1100303 | 11.277963 | 25.0476216 | 0.136191 |
| 81 | H | 0.1092428 | 10.7079719 | 14.5834216 | 0.180453 |
| 82 | H | 0.1097773 | 10.9153979 | 2.6872082 | 0.117051 |
| 83 | H | 0.1097784 | 10.8972013 | 31.2274491 | 0.117024 |
| 84 | H | 0.1092447 | 10.6409567 | 19.3782461 | 0.180530 |
| 85 | H | 0.1100274 | 11.2802408 | 12.7618045 | 0.136603 |
| 86 | H | 0.1100394 | 11.2893786 | 25.0554758 | 0.136706 |
| 87 | H | 0.1097929 | 10.8665079 | 31.6008848 | 0.113039 |
| 88 | H | 0.1092333 | 10.6616125 | 19.736372 | 0.173860 |
| 89 | H | 0.1092417 | 10.6805216 | 14.9776058 | 0.174480 |
| 90 | H | 0.1098212 | 10.9359087 | 3.0790901 | 0.113389 |

**Table S4. Coordinates of CB[6**]

| No | Atom | Coordinates | | | Atomic charge |
| --- | --- | --- | --- | --- | --- |
| X(nm) | Y(nm) | Z(nm) |
| 1 | C | 0.0000000 | 0.0000000 | 0.0000000 | 0.172919 |
| 2 | C | 0.1567676 | 0.0000000 | 0.0000000 | 0.172042 |
| 3 | N | 0.144194 | 10.34144 | 0.0000000 | -0.449673 |
| 4 | C | 0.139287 | 11.28714 | 0.624666 | 0.589946 |
| 5 | N | 0.145084 | 10.28692 | 34.95473 | -0.450312 |
| 6 | N | 0.144156 | 10.3409 | 22.70849 | -0.449247 |
| 7 | C | 0.139271 | 11.28451 | 0.576787 | 0.589729 |
| 8 | N | 0.145127 | 10.29557 | 11.19974 | -0.450614 |
| 9 | O | 0.12123 | 12.63559 | 18.37509 | -0.350295 |
| 10 | O | 0.121224 | 12.62906 | 18.44461 | -0.350197 |
| 11 | C | 0.144618 | 12.54633 | 18.62952 | 0.071482 |
| 12 | C | 0.144622 | 12.39007 | 17.0833 | 0.071450 |
| 13 | C | 0.511054 | 2.060963 | 29.76846 | 0.165016 |
| 14 | C | 0.156981 | 14.18457 | 17.99817 | 0.163040 |
| 15 | N | 0.145152 | 10.30913 | 30.73527 | -0.449393 |
| 16 | C | 0.13952 | 11.226 | 34.85424 | 0.601189 |
| 17 | N | 0.144644 | 11.60627 | 27.93954 | -0.452367 |
| 18 | N | 0.144479 | 11.47382 | 8.523641 | -0.452099 |
| 19 | C | 0.139235 | 12.06348 | 11.43735 | 0.601185 |
| 20 | N | 0.144232 | 10.32969 | 13.14724 | -0.449756 |
| 21 | O | 0.121208 | 12.6526 | 19.23344 | -0.352373 |
| 22 | O | 0.12124 | 12.65303 | 35.30571 | -0.352361 |
| 23 | C | 0.144878 | 12.4202 | 18.93865 | 0.053073 |
| 24 | C | 0.144437 | 12.55735 | 17.83142 | 0.053346 |
| 25 | C | 0.884176 | 5.079759 | 29.5902 | 0.164370 |
| 26 | C | 0.157087 | 10.90829 | 18.42327 | 0.166969 |
| 27 | N | 0.144888 | 10.32655 | 30.58724 | -0.451159 |
| 28 | C | 0.139261 | 11.26155 | 35.19159 | 0.599813 |
| 29 | N | 0.14438 | 11.53136 | 27.20842 | -0.449714 |
| 30 | N | 0.144828 | 11.54602 | 7.971941 | -0.448832 |
| 31 | C | 0.139415 | 12.04022 | 11.25071 | 0.600030 |
| 32 | N | 0.144434 | 10.32995 | 12.96041 | -0.452248 |
| 33 | O | 0.121238 | 12.65119 | 18.88221 | -0.352063 |
| 34 | O | 0.121222 | 12.64637 | 35.35917 | -0.352124 |
| 35 | C | 0.144555 | 12.43095 | 18.96463 | 0.070389 |
| 36 | C | 0.14458 | 12.56576 | 17.45931 | 0.070453 |
| 37 | C | 1.009967 | 8.105242 | 29.26866 | 0.172917 |
| 38 | C | 0.156765 | 8.105291 | 18.82328 | 0.172041 |
| 39 | N | 0.144192 | 10.34121 | 29.26699 | -0.449653 |
| 40 | C | 0.139282 | 11.287 | 0.627174 | 0.589946 |
| 41 | N | 0.144527 | 11.47874 | 27.41074 | -0.450328 |
| 42 | N | 0.144627 | 11.595 | 7.944 | -0.449229 |
| 43 | C | 0.139272 | 12.1619 | 10.00656 | 0.589728 |
| 44 | N | 0.145129 | 10.29555 | 11.19686 | -0.450632 |
| 45 | O | 0.121229 | 12.6354 | 18.37428 | -0.350296 |
| 46 | O | 0.121224 | 12.62908 | 0.196354 | -0.350197 |
| 47 | C | 0.144618 | 12.54633 | 18.62697 | 0.071483 |
| 48 | C | 0.144625 | 12.38947 | 17.08122 | 0.071450 |
| 49 | C | 0.879402 | 11.12657 | 28.93184 | 0.165016 |
| 50 | C | 0.15698 | 5.298775 | 18.2185 | 0.163039 |
| 51 | N | 0.145153 | 10.30916 | 30.02264 | -0.449395 |
| 52 | C | 0.139524 | 11.22593 | 34.8543 | 0.601196 |
| 53 | N | 0.144644 | 11.60644 | 27.942 | -0.452371 |
| 54 | N | 0.144477 | 11.47375 | 8.526118 | -0.452095 |
| 55 | C | 0.139231 | 12.06377 | 11.43692 | 0.601178 |
| 56 | N | 0.144231 | 10.32968 | 13.147 | -0.449755 |
| 57 | O | 0.121208 | 12.65274 | 19.23309 | -0.352376 |
| 58 | O | 0.12124 | 12.65284 | 35.30869 | -0.352359 |
| 59 | C | 0.144878 | 12.42011 | 18.93962 | 0.053076 |
| 60 | C | 0.144438 | 12.55741 | 17.83261 | 0.053344 |
| 61 | C | 0.511114 | 14.19831 | 28.79914 | 0.164371 |
| 62 | C | 0.157087 | 2.063994 | 17.9786 | 0.166968 |
| 63 | N | 0.144888 | 10.32646 | 30.00453 | -0.451169 |
| 64 | C | 0.13926 | 11.26139 | 35.19012 | 0.599818 |
| 65 | N | 0.14438 | 11.53139 | 27.20772 | -0.449711 |
| 66 | N | 0.14483 | 11.54587 | 7.970652 | -0.448838 |
| 67 | C | 0.139418 | 12.04003 | 11.25202 | 0.600024 |
| 68 | N | 0.144434 | 10.32994 | 12.96184 | -0.452238 |
| 69 | O | 0.121238 | 12.65112 | 18.8834 | -0.352065 |
| 70 | O | 0.121222 | 12.64646 | 35.35668 | -0.352119 |
| 71 | C | 0.144525 | 12.4254 | 17.32785 | 0.070391 |
| 72 | C | 0.144626 | 12.54821 | 18.83973 | 0.070453 |
| 73 | H | 0.110122 | 11.31778 | 10.82238 | 0.129771 |
| 74 | H | 0.110116 | 11.31211 | 23.0678 | 0.130006 |
| 75 | H | 0.109223 | 10.66969 | 16.07674 | 0.170934 |
| 76 | H | 0.109829 | 10.86327 | 4.210107 | 0.115908 |
| 77 | H | 0.109286 | 10.67613 | 20.32415 | 0.171021 |
| 78 | H | 0.110191 | 10.93356 | 32.21039 | 0.116014 |
| 79 | H | 0.1101 | 11.31573 | 12.75099 | 0.133933 |
| 80 | H | 0.110081 | 11.30805 | 25.02846 | 0.135108 |
| 81 | H | 0.109974 | 10.94158 | 3.492212 | 0.119706 |
| 82 | H | 0.109249 | 10.6578 | 15.37839 | 0.177456 |
| 83 | H | 0.109249 | 10.68588 | 19.79606 | 0.177253 |
| 84 | H | 0.109927 | 10.86113 | 31.64908 | 0.119578 |
| 85 | H | 0.110102 | 11.301 | 12.57437 | 0.134504 |
| 86 | H | 0.110107 | 11.30992 | 24.83185 | 0.132737 |
| 87 | H | 0.110169 | 10.90221 | 3.727574 | 0.116417 |
| 88 | H | 0.109292 | 10.69752 | 15.61451 | 0.170813 |
| 89 | H | 0.109866 | 10.90667 | 31.65932 | 0.116452 |
| 90 | H | 0.109228 | 10.63414 | 19.79827 | 0.170777 |
| 91 | H | 0.110122 | 11.31783 | 10.81944 | 0.129772 |
| 92 | H | 0.110116 | 11.31216 | 23.06489 | 0.130006 |
| 93 | H | 0.109828 | 10.86304 | 4.212459 | 0.115905 |
| 94 | H | 0.109223 | 10.66978 | 16.07902 | 0.170930 |
| 95 | H | 0.109286 | 10.67603 | 20.32654 | 0.171024 |
| 96 | H | 0.110192 | 10.93352 | 32.21268 | 0.116016 |
| 97 | H | 0.1101 | 11.31572 | 12.75057 | 0.133932 |
| 98 | H | 0.11008 | 11.308 | 25.0281 | 0.135108 |
| 99 | H | 0.109249 | 10.65764 | 15.37785 | 0.177453 |
| 100 | H | 0.109974 | 10.94171 | 3.49176 | 0.119705 |
| 101 | H | 0.109928 | 10.86118 | 31.64774 | 0.119579 |
| 102 | H | 0.109248 | 10.68593 | 19.79463 | 0.177255 |
| 103 | H | 0.110102 | 11.30099 | 12.57575 | 0.134504 |
| 104 | H | 0.110107 | 11.30993 | 24.83336 | 0.132737 |
| 105 | H | 0.109292 | 10.65422 | 20.08716 | 0.170811 |
| 106 | H | 0.110169 | 10.94469 | 31.97239 | 0.116415 |
| 107 | H | 0.109228 | 10.68093 | 15.896 | 0.170778 |
| 108 | H | 0.109866 | 10.85428 | 4.03663 | 0.116454 |

**Table S5. Coordinates of i-CB[6**]

| No | Atom | Coordinates | | | Atomic charge |
| --- | --- | --- | --- | --- | --- |
| X(nm) | Y(nm) | Z(nm) |
| 1 | C | 0.0000000 | 0.0000000 | 0.0000000 | 0.155959 |
| 2 | C | 0.154996 | 0.0000000 | 0.0000000 | 0.155560 |
| 3 | N | 0.14423 | 10.3208 | 0.0000000 | -0.458895 |
| 4 | C | 0.138745 | 11.23198 | 34.62511 | 0.580681 |
| 5 | N | 0.14567 | 10.28466 | 1.581589 | -0.462663 |
| 6 | N | 0.144229 | 10.32141 | 13.68459 | -0.457850 |
| 7 | C | 0.138749 | 11.23152 | 34.62408 | 0.580190 |
| 8 | N | 0.145669 | 10.28413 | 25.47828 | -0.463051 |
| 9 | O | 0.121843 | 12.65113 | 18.57787 | -0.391227 |
| 10 | O | 0.121842 | 12.65139 | 18.57963 | -0.391049 |
| 11 | C | 0.145698 | 12.29192 | 18.53281 | 0.134465 |
| 12 | C | 0.146347 | 12.29534 | 19.01546 | 0.133461 |
| 13 | C | 0.489202 | 0.099885 | 22.22706 | 0.168838 |
| 14 | C | 0.157091 | 12.05748 | 15.6795 | 0.147928 |
| 15 | N | 0.144725 | 10.34428 | 29.3004 | -0.450149 |
| 16 | C | 0.139359 | 11.31231 | 0.285768 | 0.590608 |
| 17 | N | 0.14404 | 11.14693 | 32.18406 | -0.485599 |
| 18 | N | 0.144189 | 11.29039 | 1.768909 | -0.491385 |
| 19 | C | 0.139107 | 12.20739 | 9.03145 | 0.584174 |
| 20 | N | 0.145212 | 10.31068 | 11.78106 | -0.443670 |
| 21 | O | 0.121199 | 12.66994 | 18.26966 | -0.351765 |
| 22 | O | 0.121307 | 12.6014 | 0.361361 | -0.355502 |
| 23 | C | 0.144737 | 12.56969 | 18.55831 | 0.056890 |
| 24 | C | 0.144634 | 12.51245 | 17.40124 | 0.064878 |
| 25 | C | 0.760044 | 4.264037 | 24.70664 | 0.153883 |
| 26 | C | 0.156851 | 10.12578 | 17.62707 | 0.160746 |
| 27 | N | 0.144963 | 10.31016 | 30.3165 | -0.437389 |
| 28 | C | 0.139327 | 11.2543 | 35.00534 | 0.592111 |
| 29 | N | 0.144626 | 11.58809 | 27.75458 | -0.452574 |
| 30 | N | 0.144594 | 11.50036 | 8.388984 | -0.440739 |
| 31 | C | 0.139393 | 12.0569 | 11.46491 | 0.595223 |
| 32 | N | 0.144319 | 10.3477 | 13.05378 | -0.456645 |
| 33 | O | 0.121214 | 12.65237 | 19.03999 | -0.352450 |
| 34 | O | 0.121231 | 12.64203 | 35.37259 | -0.353237 |
| 35 | C | 0.144567 | 12.42966 | 18.81012 | 0.070504 |
| 36 | C | 0.144652 | 12.54056 | 17.25094 | 0.072153 |
| 37 | C | 0.844778 | 7.930837 | 24.84798 | 0.162509 |
| 38 | C | 0.157019 | 7.928467 | 18.09096 | 0.162851 |
| 39 | N | 0.144334 | 10.33491 | 29.44724 | -0.454168 |
| 40 | C | 0.139252 | 11.29458 | 0.498742 | 0.587189 |
| 41 | N | 0.144606 | 11.47341 | 27.58478 | -0.435698 |
| 42 | N | 0.144627 | 11.59842 | 8.182392 | -0.454403 |
| 43 | C | 0.139257 | 12.14056 | 10.04384 | 0.586875 |
| 44 | N | 0.145033 | 10.30419 | 11.36323 | -0.436033 |
| 45 | O | 0.121254 | 12.62865 | 18.39117 | -0.352780 |
| 46 | O | 0.121255 | 12.62829 | 0.273439 | -0.352710 |
| 47 | C | 0.144625 | 12.5627 | 18.62206 | 0.071680 |
| 48 | C | 0.144603 | 12.43175 | 17.15772 | 0.071540 |
| 49 | C | 0.723883 | 11.6338 | 24.88495 | 0.160679 |
| 50 | C | 0.156841 | 5.784185 | 17.65254 | 0.155633 |
| 51 | N | 0.145016 | 10.30239 | 30.19248 | -0.441116 |
| 52 | C | 0.139403 | 11.25271 | 34.97172 | 0.594427 |
| 53 | N | 0.144654 | 11.59821 | 27.922 | -0.456184 |
| 54 | N | 0.144562 | 11.4739 | 8.479168 | -0.436925 |
| 55 | C | 0.13933 | 12.06161 | 11.54865 | 0.590787 |
| 56 | N | 0.144223 | 10.34179 | 13.05579 | -0.452096 |
| 57 | O | 0.121232 | 12.64209 | 19.09802 | -0.352859 |
| 58 | O | 0.121213 | 12.65266 | 35.30303 | -0.352303 |
| 59 | C | 0.144586 | 12.43765 | 18.77248 | 0.064816 |
| 60 | C | 0.144631 | 12.53478 | 17.36937 | 0.057554 |
| 61 | C | 0.436299 | 16.06203 | 25.29292 | 0.146621 |
| 62 | C | 0.157106 | 4.108843 | 17.82181 | 0.168215 |
| 63 | N | 0.144839 | 10.33704 | 29.98198 | -0.491202 |
| 64 | C | 0.139096 | 11.31053 | 0.299239 | 0.584286 |
| 65 | N | 0.144634 | 11.49936 | 27.52992 | -0.442859 |
| 66 | N | 0.144735 | 11.58827 | 8.225175 | -0.450962 |
| 67 | C | 0.139363 | 12.11066 | 10.03188 | 0.591621 |
| 68 | N | 0.145259 | 10.30017 | 11.76843 | -0.485847 |
| 69 | O | 0.121308 | 12.60006 | 18.20913 | -0.355678 |
| 70 | O | 0.1212 | 12.6698 | 0.031161 | -0.352073 |
| 71 | C | 0.146347 | 12.29544 | 19.01907 | 0.130707 |
| 72 | C | 0.145698 | 12.28895 | 18.537 | 0.133352 |
| 73 | H | 0.109289 | 11.28669 | 25.63176 | 0.166995 |
| 74 | H | 0.109291 | 11.28535 | 13.53018 | 0.167484 |
| 75 | H | 0.10915 | 10.74755 | 20.1927 | 0.163264 |
| 76 | H | 0.110032 | 11.13725 | 8.286055 | 0.119175 |
| 77 | H | 0.109258 | 10.75818 | 13.82922 | 0.161912 |
| 78 | H | 0.109747 | 11.03785 | 25.68492 | 0.125836 |
| 79 | H | 0.10982 | 11.34181 | 11.41946 | 0.149720 |
| 80 | H | 0.109962 | 11.31529 | 23.64871 | 0.143065 |
| 81 | H | 0.109832 | 10.88559 | 4.046655 | 0.122844 |
| 82 | H | 0.10923 | 10.66379 | 15.89919 | 0.180808 |
| 83 | H | 0.109283 | 10.67961 | 20.18641 | 0.174549 |
| 84 | H | 0.110052 | 10.89981 | 32.05827 | 0.119281 |
| 85 | H | 0.11008 | 11.31552 | 12.70453 | 0.138681 |
| 86 | H | 0.110086 | 11.31072 | 24.94569 | 0.135134 |
| 87 | H | 0.110155 | 10.93139 | 3.891723 | 0.113781 |
| 88 | H | 0.10928 | 10.67879 | 15.77951 | 0.170910 |
| 89 | H | 0.109829 | 10.87258 | 31.90094 | 0.122140 |
| 90 | H | 0.109226 | 10.66745 | 20.04156 | 0.173737 |
| 91 | H | 0.11008 | 11.31692 | 10.99877 | 0.133308 |
| 92 | H | 0.110081 | 11.31681 | 23.23987 | 0.133182 |
| 93 | H | 0.10983 | 10.86971 | 4.202905 | 0.122368 |
| 94 | H | 0.109225 | 10.66462 | 16.06006 | 0.173643 |
| 95 | H | 0.109281 | 10.6733 | 20.28593 | 0.170421 |
| 96 | H | 0.110158 | 10.92362 | 32.16521 | 0.113772 |
| 97 | H | 0.110088 | 11.31044 | 12.70677 | 0.134731 |
| 98 | H | 0.110083 | 11.3152 | 24.94462 | 0.138021 |
| 99 | H | 0.109284 | 10.65445 | 15.71898 | 0.174507 |
| 100 | H | 0.110053 | 10.94483 | 3.836825 | 0.119307 |
| 101 | H | 0.10983 | 10.87556 | 31.92727 | 0.122870 |
| 102 | H | 0.10923 | 10.66799 | 20.0773 | 0.180621 |
| 103 | H | 0.10996 | 11.31559 | 11.39949 | 0.143599 |
| 104 | H | 0.109819 | 11.34114 | 23.64759 | 0.150397 |
| 105 | H | 0.109257 | 10.7574 | 13.82702 | 0.162391 |
| 106 | H | 0.109744 | 11.03805 | 25.68301 | 0.126738 |
| 107 | H | 0.109149 | 10.74733 | 20.18553 | 0.163632 |
| 108 | H | 0.110031 | 11.13729 | 8.278608 | 0.119315 |

**Table S6. Coordinates of i(1,4)-CB[6]**

| No | Atom | Coordinates | | | Atomic charge |
| --- | --- | --- | --- | --- | --- |
| X(nm) | Y(nm) | Z(nm) |
| 1 | C | 0.0000000 | 0.0000000 | 0.0000000 | 0.155377 |
| 2 | C | 0.1550058 | 0.0000000 | 0.0000000 | 0.164950 |
| 3 | N | 0.1441772 | 10.322295 | 0.0000000 | -0.460243 |
| 4 | C | 0.1387911 | 11.2244639 | 34.582406 | 0.581128 |
| 5 | N | 0.1457713 | 10.2723147 | 1.6546718 | -0.464481 |
| 6 | N | 0.1442022 | 10.311346 | 13.7814887 | -0.461337 |
| 7 | C | 0.1388396 | 11.2269749 | 34.557535 | 0.578697 |
| 8 | N | 0.1456486 | 10.2792583 | 25.5372246 | -0.463125 |
| 9 | O | 0.1218124 | 12.6449553 | 18.5743933 | -0.388976 |
| 10 | O | 0.1218042 | 12.644668 | 18.5992713 | -0.388015 |
| 11 | C | 0.1458052 | 12.3296738 | 18.4503418 | 0.130895 |
| 12 | C | 0.1462479 | 12.2766445 | 18.9097049 | 0.127099 |
| 13 | C | 0.4893039 | 0.0926499 | 22.6462618 | 0.164592 |
| 14 | C | 0.1571526 | 12.0862627 | 16.1685427 | 0.142488 |
| 15 | N | 0.1449936 | 10.3218643 | 30.1290215 | -0.443492 |
| 16 | C | 0.1392339 | 11.3098704 | 35.542293 | 0.587442 |
| 17 | N | 0.1441495 | 11.186772 | 32.3043834 | -0.486329 |
| 18 | N | 0.1442261 | 11.2491027 | 1.9264001 | -0.489932 |
| 19 | C | 0.1391046 | 12.2062643 | 9.8451755 | 0.585259 |
| 20 | N | 0.1448454 | 10.3395225 | 12.6335165 | -0.453752 |
| 21 | O | 0.1212514 | 12.668751 | 18.514267 | -0.353863 |
| 22 | O | 0.1212378 | 12.6105922 | 35.8746281 | -0.352384 |
| 23 | C | 0.1445644 | 12.5100911 | 18.6431742 | 0.062260 |
| 24 | C | 0.1447674 | 12.5555107 | 17.4366488 | 0.065130 |
| 25 | C | 0.762412 | 4.2544709 | 24.3730685 | 0.147586 |
| 26 | C | 0.1569531 | 10.0869637 | 18.0653501 | 0.163309 |
| 27 | N | 0.1447467 | 10.3389737 | 29.3995127 | -0.487154 |
| 28 | C | 0.1391162 | 11.3082526 | 0.4619964 | 0.577218 |
| 29 | N | 0.1446964 | 11.5061972 | 27.5552642 | -0.441649 |
| 30 | N | 0.1446703 | 11.5976738 | 8.2485829 | -0.448421 |
| 31 | C | 0.1393897 | 12.1330245 | 9.8806613 | 0.582974 |
| 32 | N | 0.1452886 | 10.2893765 | 11.5487588 | -0.480183 |
| 33 | O | 0.1212852 | 12.6057937 | 18.1327977 | -0.353790 |
| 34 | O | 0.1212066 | 12.6646019 | 0.0776957 | -0.351450 |
| 35 | C | 0.1442329 | 12.4605183 | 18.223402 | 0.137143 |
| 36 | C | 0.1440104 | 12.456954 | 18.1262306 | 0.134633 |
| 37 | C | 0.6683097 | 7.7414377 | 24.58145 | 0.155534 |
| 38 | C | 0.1550101 | 7.7426972 | 17.4940322 | 0.164941 |
| 39 | N | 0.1441807 | 10.3225754 | 24.5767215 | -0.460160 |
| 40 | C | 0.1387926 | 11.2245648 | 34.5857766 | 0.581060 |
| 41 | N | 0.1463714 | 11.3057731 | 27.2073662 | -0.464570 |
| 42 | N | 0.1457915 | 11.141519 | 9.2134847 | -0.461262 |
| 43 | C | 0.1388389 | 12.1570328 | 16.4012866 | 0.578658 |
| 44 | N | 0.145644 | 10.2797092 | 25.5330424 | -0.463099 |
| 45 | O | 0.121813 | 12.6450486 | 18.5723184 | -0.389012 |
| 46 | O | 0.1218041 | 12.6445459 | 34.7079207 | -0.388011 |
| 47 | C | 0.1458019 | 12.3287847 | 18.4529766 | 0.130706 |
| 48 | C | 0.1462442 | 12.2765686 | 18.9153257 | 0.127016 |
| 49 | C | 0.7306437 | 11.7910619 | 24.930663 | 0.164473 |
| 50 | C | 0.1571501 | 5.8041852 | 17.58224 | 0.142384 |
| 51 | N | 0.1449897 | 10.3211052 | 30.2483986 | -0.443358 |
| 52 | C | 0.1392333 | 11.3098277 | 35.5324707 | 0.587389 |
| 53 | N | 0.1441583 | 11.1873537 | 32.299745 | -0.486179 |
| 54 | N | 0.14422 | 11.2471171 | 1.9214825 | -0.489870 |
| 55 | C | 0.1391056 | 12.2055991 | 9.8565802 | 0.585226 |
| 56 | N | 0.1448417 | 10.340318 | 12.6447803 | -0.453820 |
| 57 | O | 0.1212516 | 12.6685717 | 18.5171105 | -0.353829 |
| 58 | O | 0.1212363 | 12.6106547 | 35.8739283 | -0.352304 |
| 59 | C | 0.1445626 | 12.5095622 | 18.6403735 | 0.062444 |
| 60 | C | 0.1447712 | 12.556006 | 17.4320362 | 0.065173 |
| 61 | C | 0.4384397 | 16.158439 | 25.4095932 | 0.147533 |
| 62 | C | 0.1569476 | 4.0351083 | 17.8308749 | 0.163215 |
| 63 | N | 0.1447437 | 10.3383525 | 29.9634656 | -0.486977 |
| 64 | C | 0.1391151 | 11.3080118 | 0.4762651 | 0.577020 |
| 65 | N | 0.1447016 | 11.5054877 | 27.5573508 | -0.441427 |
| 66 | N | 0.1446691 | 11.5996374 | 8.2516131 | -0.448550 |
| 67 | C | 0.1393947 | 12.1326667 | 9.8674566 | 0.582895 |
| 68 | N | 0.1452982 | 10.2882681 | 11.5301117 | -0.480225 |
| 69 | O | 0.1212859 | 12.6053117 | 18.1252215 | -0.353710 |
| 70 | O | 0.1212059 | 12.6647935 | 0.0877109 | -0.351339 |
| 71 | C | 0.1463643 | 12.3120048 | 18.9406117 | 0.136975 |
| 72 | C | 0.1457943 | 12.3173048 | 18.4816117 | 0.134810 |
| 73 | H | 0.1093116 | 11.29097 | 25.7245932 | 0.163594 |
| 74 | H | 0.1093161 | 11.3123164 | 13.6008004 | 0.158589 |
| 75 | H | 0.1091345 | 10.7320059 | 20.2980872 | 0.165172 |
| 76 | H | 0.1099521 | 11.1416355 | 8.4056395 | 0.122452 |
| 77 | H | 0.1092656 | 10.7717094 | 13.9701452 | 0.165303 |
| 78 | H | 0.1097906 | 11.0233467 | 25.8435575 | 0.128811 |
| 79 | H | 0.1098168 | 11.3383187 | 12.3080024 | 0.153980 |
| 80 | H | 0.1099608 | 11.3164624 | 24.5262952 | 0.147018 |
| 81 | H | 0.1099728 | 10.9123835 | 3.8595423 | 0.125416 |
| 82 | H | 0.1092712 | 10.6729527 | 15.7353229 | 0.175442 |
| 83 | H | 0.1092153 | 10.6469635 | 20.0888985 | 0.180067 |
| 84 | H | 0.1097917 | 10.8907678 | 31.9443902 | 0.126051 |
| 85 | H | 0.1099709 | 11.3179531 | 11.2163392 | 0.142809 |
| 86 | H | 0.1098183 | 11.3488557 | 23.4429405 | 0.151792 |
| 87 | H | 0.1097412 | 10.7717025 | 3.4302869 | 0.126227 |
| 88 | H | 0.1092642 | 10.9339615 | 15.2288487 | 0.161189 |
| 89 | H | 0.1100386 | 10.833873 | 32.944347 | 0.121208 |
| 90 | H | 0.1091489 | 10.9421528 | 21.0965971 | 0.165297 |
| 91 | H | 0.1093134 | 11.2900304 | 25.7209577 | 0.163567 |
| 92 | H | 0.1093159 | 11.3125346 | 13.5961086 | 0.158565 |
| 93 | H | 0.1099507 | 11.1413511 | 8.4007373 | 0.122498 |
| 94 | H | 0.1091337 | 10.7314421 | 20.2928861 | 0.165182 |
| 95 | H | 0.1092659 | 10.7723404 | 13.9644412 | 0.165326 |
| 96 | H | 0.1097916 | 11.0237824 | 25.8379155 | 0.128819 |
| 97 | H | 0.1098167 | 11.3382609 | 12.3208759 | 0.153986 |
| 98 | H | 0.1099614 | 11.316608 | 24.5383583 | 0.147042 |
| 99 | H | 0.1092708 | 10.6722674 | 15.7387862 | 0.175300 |
| 100 | H | 0.1099769 | 10.9128229 | 3.862815 | 0.125327 |
| 101 | H | 0.1097891 | 10.8904078 | 31.9473923 | 0.126034 |
| 102 | H | 0.1092139 | 10.6464504 | 20.0919744 | 0.180109 |
| 103 | H | 0.1099705 | 11.3184322 | 11.1982396 | 0.142801 |
| 104 | H | 0.1098182 | 11.3489116 | 23.4244394 | 0.151814 |
| 105 | H | 0.1092636 | 10.7547659 | 13.8869119 | 0.161184 |
| 106 | H | 0.1097393 | 11.0376593 | 25.733609 | 0.126223 |
| 107 | H | 0.1091487 | 10.7588347 | 20.316536 | 0.165268 |
| 108 | H | 0.1100398 | 11.1239784 | 8.4093 | 0.121188 |

**Table S7. Coordinates** of CB[7]

| No | Atom | Coordinates | | | Atomic charge |
| --- | --- | --- | --- | --- | --- |
| X(nm) | Y(nm) | Z(nm) |
| 1 | C | 0.0000000 | 0.0000000 | 0.0000000 | 0.168769 |
| 2 | C | 0.1570505 | 0.0000000 | 0.0000000 | 0.169212 |
| 3 | N | 0.1447732 | 10.3393636 | 0.0000000 | -0.441146 |
| 4 | C | 0.1393002 | 11.2613729 | 0.6139617 | 0.588428 |
| 5 | N | 0.1444544 | 10.3405535 | 35.7063228 | -0.448402 |
| 6 | N | 0.1447478 | 10.3370899 | 11.9427968 | -0.443061 |
| 7 | C | 0.1392689 | 11.2686857 | 0.5770209 | 0.590476 |
| 8 | N | 0.1444270 | 10.3405103 | 23.469137 | -0.449961 |
| 9 | O | 0.1213206 | 12.6385622 | 17.0195305 | -0.358238 |
| 10 | O | 0.1213201 | 12.6400091 | 17.0818792 | -0.359144 |
| 11 | C | 0.1445987 | 12.4158258 | 16.766454 | 0.079225 |
| 12 | C | 0.1444177 | 12.485552 | 19.0412485 | 0.079607 |
| 13 | C | 0.5087635 | 1.7470208 | 6.0690471 | 0.154552 |
| 14 | C | 0.1570024 | 14.7902167 | 18.0182062 | 0.168346 |
| 15 | N | 0.1445877 | 10.3324054 | 6.0751219 | -0.444467 |
| 16 | C | 0.1392079 | 11.2924539 | 0.3953822 | 0.592198 |
| 17 | N | 0.1444128 | 11.5242988 | 8.1843617 | -0.444024 |
| 18 | N | 0.1446002 | 11.5387188 | 28.030661 | -0.439880 |
| 19 | C | 0.1393222 | 12.0822278 | 24.2944754 | 0.588605 |
| 20 | N | 0.14455 | 10.3365539 | 23.65835 | -0.444749 |
| 21 | O | 0.1212988 | 12.6398633 | 17.1603434 | -0.358032 |
| 22 | O | 0.1212901 | 12.6406551 | 0.7452155 | -0.356999 |
| 23 | C | 0.1444968 | 12.4583646 | 17.096587 | 0.071201 |
| 24 | C | 0.1445611 | 12.4644763 | 18.9680876 | 0.070689 |
| 25 | C | 0.9187346 | 4.3123289 | 6.0757194 | 0.146575 |
| 26 | C | 0.156911 | 11.9467662 | 17.9649128 | 0.165534 |
| 27 | N | 0.1445708 | 10.3409831 | 6.2083928 | -0.444650 |
| 28 | C | 0.1392264 | 11.2927021 | 0.2149956 | 0.595194 |
| 29 | N | 0.1445414 | 11.5261971 | 8.1906545 | -0.440693 |
| 30 | N | 0.1445072 | 11.5430048 | 27.7716764 | -0.445396 |
| 31 | C | 0.1392098 | 12.1435767 | 24.9214679 | 0.596416 |
| 32 | N | 0.1446939 | 10.3367918 | 23.8991732 | -0.442002 |
| 33 | O | 0.1212835 | 12.6391443 | 17.2172746 | -0.356959 |
| 34 | O | 0.1212838 | 12.6412332 | 0.3439133 | -0.357148 |
| 35 | C | 0.1445488 | 12.451631 | 16.9207035 | 0.065929 |
| 36 | C | 0.1445723 | 12.4306925 | 19.0587364 | 0.064357 |
| 37 | C | 1.1347158 | 6.9227411 | 6.0776724 | 0.153615 |
| 38 | C | 0.1569608 | 9.4029985 | 18.0369517 | 0.155374 |
| 39 | N | 0.1445841 | 10.3439637 | 6.2352859 | -0.442131 |
| 40 | C | 0.1392488 | 11.2827107 | 0.3195746 | 0.598952 |
| 41 | N | 0.1445019 | 11.5305142 | 8.158893 | -0.441769 |
| 42 | N | 0.1444672 | 11.5228372 | 27.853876 | -0.442393 |
| 43 | C | 0.1392068 | 12.1168675 | 24.6552913 | 0.599329 |
| 44 | N | 0.1446102 | 10.3402559 | 23.8065101 | -0.441964 |
| 45 | O | 0.1213041 | 12.6385305 | 17.1471247 | -0.358677 |
| 46 | O | 0.1213031 | 12.637457 | 0.5358091 | -0.358783 |
| 47 | C | 0.1445423 | 12.4411318 | 16.8216202 | 0.055863 |
| 48 | C | 0.144495 | 12.4342794 | 19.153015 | 0.062220 |
| 49 | C | 1.1316763 | 9.5166176 | 6.045586 | 0.156402 |
| 50 | C | 0.1569694 | 7.0444818 | 18.1431738 | 0.154018 |
| 51 | N | 0.1446622 | 10.3403692 | 6.1268887 | -0.440482 |
| 52 | C | 0.1392463 | 11.2764015 | 0.4863153 | 0.598881 |
| 53 | N | 0.1445047 | 11.5350274 | 8.0864793 | -0.443978 |
| 54 | N | 0.1445263 | 11.5220308 | 27.9064898 | -0.440529 |
| 55 | C | 0.1392643 | 12.0876929 | 24.3365711 | 0.599121 |
| 56 | N | 0.1445049 | 10.3402696 | 23.6140354 | -0.444341 |
| 57 | O | 0.1213035 | 12.6400615 | 17.073519 | -0.358660 |
| 58 | O | 0.1213003 | 12.6413426 | 0.7017949 | -0.358613 |
| 59 | C | 0.1445468 | 12.4179064 | 16.8813925 | 0.066203 |
| 60 | C | 0.1444444 | 12.4525167 | 19.0620986 | 0.065668 |
| 61 | C | 0.9146577 | 12.1339898 | 5.9689779 | 0.166500 |
| 62 | C | 0.1569268 | 4.4990259 | 18.2019323 | 0.147721 |
| 63 | N | 0.1446715 | 10.3402691 | 6.0301789 | -0.440820 |
| 64 | C | 0.1392351 | 11.2828112 | 0.459086 | 0.595593 |
| 65 | N | 0.1444999 | 11.5292908 | 8.1920519 | -0.445108 |
| 66 | N | 0.1446181 | 11.5277058 | 27.8648495 | -0.442249 |
| 67 | C | 0.1392723 | 12.1023794 | 24.4954605 | 0.595257 |
| 68 | N | 0.1445235 | 10.3451366 | 23.6005836 | -0.446201 |
| 69 | O | 0.1212873 | 12.6442163 | 17.1381786 | -0.357324 |
| 70 | O | 0.121279 | 12.6406722 | 0.611484 | -0.356765 |
| 71 | C | 0.1444921 | 12.429188 | 16.9850441 | 0.072193 |
| 72 | C | 0.1445574 | 12.4581108 | 18.9860925 | 0.072488 |
| 73 | C | 0.5090086 | 14.7559147 | 5.8465894 | 0.167995 |
| 74 | C | 0.1569425 | 1.724754 | 17.9988641 | 0.154636 |
| 75 | N | 0.1444231 | 10.3526946 | 6.1232612 | -0.446097 |
| 76 | C | 0.1392464 | 11.2878659 | 0.0430202 | 0.590357 |
| 77 | N | 0.144564 | 11.5161492 | 8.2745987 | -0.441284 |
| 78 | N | 0.1445098 | 11.5544049 | 27.8220182 | -0.447693 |
| 79 | C | 0.1391918 | 12.1432957 | 25.1408081 | 0.589125 |
| 80 | N | 0.1447873 | 10.3401075 | 24.1165236 | -0.437723 |
| 81 | O | 0.1212887 | 12.6388556 | 17.2816966 | -0.357054 |
| 82 | O | 0.121293 | 12.633046 | 0.1892784 | -0.357438 |
| 83 | C | 0.144494 | 12.482857 | 19.0916344 | 0.076539 |
| 84 | C | 0.14452 | 12.4281017 | 16.8404945 | 0.083858 |
| 85 | H | 0.1101506 | 11.3107621 | 23.8231682 | 0.127217 |
| 86 | H | 0.1101513 | 11.3092295 | 11.5843411 | 0.126803 |
| 87 | H | 0.109263 | 10.6665281 | 20.0149051 | 0.168792 |
| 88 | H | 0.11019 | 10.9184269 | 31.8740223 | 0.115546 |
| 89 | H | 0.1101496 | 10.8960246 | 4.3395993 | 0.116574 |
| 90 | H | 0.1092613 | 10.6714017 | 16.1947326 | 0.168820 |
| 91 | H | 0.110169 | 11.3143576 | 24.0254686 | 0.130875 |
| 92 | H | 0.1101514 | 11.3104855 | 11.7860691 | 0.130609 |
| 93 | H | 0.1100925 | 10.8924344 | 31.921937 | 0.116528 |
| 94 | H | 0.1092658 | 10.6848201 | 20.0498999 | 0.170884 |
| 95 | H | 0.1092589 | 10.6818849 | 15.9091575 | 0.172521 |
| 96 | H | 0.11005 | 10.8850331 | 4.0364634 | 0.117346 |
| 97 | H | 0.1101694 | 11.3199153 | 24.2691138 | 0.135726 |
| 98 | H | 0.1101332 | 11.3293119 | 12.021811 | 0.130634 |
| 99 | H | 0.1101144 | 10.8833393 | 31.88881 | 0.117788 |
| 100 | H | 0.109258 | 10.6888744 | 20.0122924 | 0.173402 |
| 101 | H | 0.109262 | 10.6824854 | 15.9966494 | 0.173190 |
| 102 | H | 0.1101276 | 10.8972054 | 4.1164516 | 0.117890 |
| 103 | H | 0.1101877 | 11.3129126 | 24.1641642 | 0.134793 |
| 104 | H | 0.1101628 | 11.3183932 | 11.9264377 | 0.133612 |
| 105 | H | 0.1092618 | 10.6739758 | 19.9256523 | 0.176167 |
| 106 | H | 0.1101534 | 10.9011565 | 31.7920777 | 0.120878 |
| 107 | H | 0.1101862 | 10.9000138 | 4.1985935 | 0.118405 |
| 108 | H | 0.1092652 | 10.6786567 | 16.066305 | 0.173661 |
| 109 | H | 0.1101661 | 11.3171084 | 23.9728832 | 0.133310 |
| 110 | H | 0.1101872 | 11.3114084 | 11.7332328 | 0.134537 |
| 111 | H | 0.1092595 | 10.6813724 | 20.050899 | 0.172969 |
| 112 | H | 0.1101154 | 10.8920916 | 31.9268042 | 0.117637 |
| 113 | H | 0.11012 | 10.880183 | 4.1372861 | 0.117617 |
| 114 | H | 0.1092618 | 10.6900697 | 16.0126041 | 0.173371 |
| 115 | H | 0.1101286 | 11.3251559 | 23.9600204 | 0.130193 |
| 116 | H | 0.1101639 | 11.3171617 | 11.7140998 | 0.135172 |
| 117 | H | 0.1092732 | 10.6950266 | 20.1278989 | 0.170119 |
| 118 | H | 0.1101243 | 10.8858942 | 31.9975344 | 0.115561 |
| 119 | H | 0.109251 | 10.6803527 | 15.9572372 | 0.172558 |
| 120 | H | 0.1100247 | 10.8838834 | 4.0854855 | 0.117601 |
| 121 | H | 0.1101518 | 11.3125472 | 24.4736349 | 0.130598 |
| 122 | H | 0.1101687 | 11.3162872 | 12.2320416 | 0.130767 |
| 123 | H | 0.1101083 | 10.9023314 | 4.3050403 | 0.118798 |
| 124 | H | 0.1092589 | 10.6611451 | 16.1593999 | 0.170131 |
| 125 | H | 0.1102297 | 10.9126442 | 31.8465502 | 0.112858 |
| 126 | H | 0.1092612 | 10.6739289 | 19.9855786 | 0.167354 |

Table S8. Coordinates of i-CB[7]

| No | Atom | Coordinates | | | Atomic charge |
| --- | --- | --- | --- | --- | --- |
| X(nm) | Y(nm) | Z(nm) |
| 1 | C | 0.0000000 | 0.0000000 | 0.0000000 | 0.158486 |
| 2 | C | 0.1568238 | 0.0000000 | 0.0000000 | 0.159591 |
| 3 | N | 0.1450391 | 10.3167156 | 0.0000000 | -0.432443 |
| 4 | C | 0.1392499 | 11.2424783 | 0.996087 | 0.592265 |
| 5 | N | 0.1441872 | 10.3278753 | 35.1189988 | -0.454903 |
| 6 | N | 0.1451855 | 10.3197437 | 11.3452786 | -0.436675 |
| 7 | C | 0.1396573 | 11.2070923 | 1.1136695 | 0.585464 |
| 8 | N | 0.1442554 | 10.3399715 | 22.8999331 | -0.450799 |
| 9 | O | 0.1213081 | 12.6552117 | 17.016136 | -0.357994 |
| 10 | O | 0.1212805 | 12.6389539 | 16.8126217 | -0.355177 |
| 11 | C | 0.1446143 | 12.3827052 | 16.9501591 | 0.074414 |
| 12 | C | 0.1446012 | 12.501302 | 19.0771629 | 0.073067 |
| 13 | C | 0.5090613 | 1.8126302 | 6.1149964 | 0.159234 |
| 14 | C | 0.1568839 | 14.682467 | 18.0152006 | 0.155305 |
| 15 | N | 0.1443032 | 10.34204 | 6.560223 | -0.449687 |
| 16 | C | 0.1391511 | 11.2994782 | 35.8522011 | 0.595371 |
| 17 | N | 0.1444889 | 11.4899086 | 8.2073008 | -0.435919 |
| 18 | N | 0.1445337 | 11.5804235 | 27.9274006 | -0.451057 |
| 19 | C | 0.1392029 | 12.1522824 | 24.9611674 | 0.593329 |
| 20 | N | 0.1449308 | 10.3280483 | 24.2941144 | -0.435803 |
| 21 | O | 0.1212938 | 12.6346221 | 17.4142806 | -0.358469 |
| 22 | O | 0.1212836 | 12.6349683 | 0.1929468 | -0.356867 |
| 23 | C | 0.1443358 | 12.4855584 | 16.9529327 | 0.069509 |
| 24 | C | 0.1447289 | 12.3851 | 19.1584815 | 0.053465 |
| 25 | C | 0.9188528 | 4.3637148 | 5.9974887 | 0.142804 |
| 26 | C | 0.1568208 | 12.1166823 | 18.2455236 | 0.164948 |
| 27 | N | 0.1442748 | 10.3423489 | 7.0150688 | -0.450752 |
| 28 | C | 0.1391864 | 11.292327 | 35.6357829 | 0.594202 |
| 29 | N | 0.1447714 | 11.5237286 | 8.1071804 | -0.431450 |
| 30 | N | 0.1444062 | 11.5355119 | 27.8318163 | -0.447033 |
| 31 | C | 0.1391026 | 12.1628957 | 25.4175852 | 0.597785 |
| 32 | N | 0.1450124 | 10.3123596 | 24.5838231 | -0.435210 |
| 33 | O | 0.1212973 | 12.6310048 | 17.4541964 | -0.357921 |
| 34 | O | 0.1212942 | 12.6357911 | 0.1151164 | -0.358174 |
| 35 | C | 0.1445245 | 12.5205643 | 16.98822 | 0.061184 |
| 36 | C | 0.1445872 | 12.3945043 | 19.1241573 | 0.065055 |
| 37 | C | 1.1482689 | 6.9099803 | 5.7588233 | 0.163707 |
| 38 | C | 0.1569351 | 9.6194151 | 18.7845937 | 0.140070 |
| 39 | N | 0.1448429 | 10.3396503 | 6.3898015 | -0.439615 |
| 40 | C | 0.1394435 | 11.2542055 | 0.6755441 | 0.591929 |
| 41 | N | 0.1446119 | 11.5653309 | 7.983704 | -0.446194 |
| 42 | N | 0.1444534 | 11.4913636 | 27.7882418 | -0.437774 |
| 43 | C | 0.1391883 | 12.0730076 | 24.3407955 | 0.595582 |
| 44 | N | 0.1443198 | 10.3371186 | 23.4462306 | -0.444068 |
| 45 | O | 0.1212828 | 12.6386783 | 16.9711918 | -0.356768 |
| 46 | O | 0.1213177 | 12.6500935 | 0.8201647 | -0.358514 |
| 47 | C | 0.1447478 | 12.4102205 | 16.8214681 | 0.066839 |
| 48 | C | 0.1442367 | 12.4880377 | 19.0039742 | 0.068984 |
| 49 | C | 1.1566871 | 9.4388207 | 5.3791752 | 0.142398 |
| 50 | C | 0.156417 | 6.9516082 | 19.0345626 | 0.158350 |
| 51 | N | 0.1453945 | 10.2912286 | 5.4313132 | -0.475012 |
| 52 | C | 0.1393632 | 11.2455334 | 1.1730614 | 0.585701 |
| 53 | N | 0.1444904 | 11.5684443 | 8.1985508 | -0.447538 |
| 54 | N | 0.1448804 | 11.5119582 | 27.8941714 | -0.429361 |
| 55 | C | 0.1395177 | 12.0035467 | 23.8660795 | 0.573479 |
| 56 | N | 0.1442739 | 10.3375721 | 22.6853884 | -0.481045 |
| 57 | O | 0.1212135 | 12.6473198 | 17.0380145 | -0.354627 |
| 58 | O | 0.12131 | 12.6817558 | 1.2744226 | -0.355744 |
| 59 | C | 0.1439157 | 12.3352564 | 17.5173763 | 0.137068 |
| 60 | C | 0.1440955 | 12.4111215 | 18.3687844 | 0.137522 |
| 61 | C | 0.8112423 | 11.1112485 | 5.270734 | 0.156815 |
| 62 | C | 0.1555432 | 3.5005157 | 17.7936548 | 0.160010 |
| 63 | N | 0.1460859 | 10.2100478 | 12.1337805 | -0.470414 |
| 64 | C | 0.1388622 | 11.1760706 | 34.42382 | 0.581978 |
| 65 | N | 0.1460848 | 11.1612092 | 9.2824309 | -0.456120 |
| 66 | N | 0.1459948 | 11.3709602 | 27.3022103 | -0.470524 |
| 67 | C | 0.1389336 | 12.0245344 | 22.3241156 | 0.588237 |
| 68 | N | 0.1441944 | 10.3032909 | 14.0040466 | -0.466814 |
| 69 | O | 0.1219451 | 12.653581 | 18.5706908 | -0.393133 |
| 70 | O | 0.1219704 | 12.649524 | 34.682001 | -0.396372 |
| 71 | C | 0.1459453 | 12.4401027 | 18.3804921 | 0.146123 |
| 72 | C | 0.1461015 | 12.465358 | 18.1609301 | 0.144493 |
| 73 | C | 0.5093783 | 14.6290026 | 5.4129257 | 0.166592 |
| 74 | C | 0.15666 | 1.8071023 | 18.026038 | 0.149320 |
| 75 | N | 0.1452068 | 10.3334634 | 5.9381791 | -0.438012 |
| 76 | C | 0.1394803 | 11.2597539 | 0.6761427 | 0.573566 |
| 77 | N | 0.1441298 | 11.3349517 | 2.2386739 | -0.485922 |
| 78 | N | 0.1438178 | 11.1751222 | 33.0940717 | -0.482656 |
| 79 | C | 0.1392369 | 12.2344571 | 25.9412987 | 0.584077 |
| 80 | N | 0.1445433 | 10.3412826 | 23.3098119 | -0.449083 |
| 81 | O | 0.1212799 | 12.6746074 | 17.1755815 | -0.354983 |
| 82 | O | 0.1212447 | 12.6325118 | 0.3826833 | -0.356278 |
| 83 | C | 0.1442418 | 12.5452129 | 18.7254746 | 0.078075 |
| 84 | C | 0.1448883 | 12.3583454 | 16.6547639 | 0.082155 |
| 85 | H | 0.1101098 | 11.3145485 | 23.2244654 | 0.132484 |
| 86 | H | 0.1101314 | 11.330117 | 11.0146242 | 0.133012 |
| 87 | H | 0.1092668 | 10.6761728 | 20.0555588 | 0.168457 |
| 88 | H | 0.1102106 | 10.9084816 | 31.9322591 | 0.113290 |
| 89 | H | 0.109977 | 10.8447134 | 4.2019173 | 0.120708 |
| 90 | H | 0.1092459 | 10.6857727 | 16.0653818 | 0.174410 |
| 91 | H | 0.1101545 | 11.3157882 | 24.6424419 | 0.131973 |
| 92 | H | 0.1101515 | 11.318321 | 12.4161948 | 0.135132 |
| 93 | H | 0.1101389 | 10.8612724 | 31.8080482 | 0.117848 |
| 94 | H | 0.1092526 | 10.7070451 | 19.9427748 | 0.172449 |
| 95 | H | 0.1092432 | 10.662206 | 15.9608865 | 0.177744 |
| 96 | H | 0.1100952 | 10.9249128 | 4.0874906 | 0.122930 |
| 97 | H | 0.1101357 | 11.3209144 | 24.9418677 | 0.137393 |
| 98 | H | 0.1101434 | 11.3077366 | 12.7032524 | 0.133220 |
| 99 | H | 0.1100125 | 10.8711502 | 31.6898321 | 0.121400 |
| 100 | H | 0.1092451 | 10.6884468 | 19.8329232 | 0.178153 |
| 101 | H | 0.1092708 | 10.6732299 | 15.9585577 | 0.167389 |
| 102 | H | 0.1102417 | 10.9443894 | 4.0906731 | 0.118680 |
| 103 | H | 0.1101298 | 11.326392 | 23.7788417 | 0.133969 |
| 104 | H | 0.1101378 | 11.3257232 | 11.5583578 | 0.139634 |
| 105 | H | 0.1092387 | 10.6400485 | 20.0668729 | 0.176338 |
| 106 | H | 0.1100131 | 10.9324293 | 31.9314538 | 0.121854 |
| 107 | H | 0.1101374 | 10.8894047 | 4.2014536 | 0.120041 |
| 108 | H | 0.109258 | 10.6919677 | 16.0699395 | 0.170911 |
| 109 | H | 0.1100299 | 11.3290981 | 22.9574026 | 0.139050 |
| 110 | H | 0.1098767 | 11.3685292 | 10.7664894 | 0.148232 |
| 111 | H | 0.1091601 | 10.9066914 | 21.1952563 | 0.162473 |
| 112 | H | 0.1101206 | 10.8787356 | 33.0162961 | 0.120148 |
| 113 | H | 0.1097931 | 10.741452 | 3.5370273 | 0.124185 |
| 114 | H | 0.109251 | 10.9370404 | 15.3239035 | 0.160463 |
| 115 | H | 0.1093047 | 11.3051218 | 13.8570736 | 0.167304 |
| 116 | H | 0.1093011 | 11.3320364 | 25.9576782 | 0.168671 |
| 117 | H | 0.1092516 | 10.7381664 | 14.3254527 | 0.159489 |
| 118 | H | 0.1098268 | 11.0193903 | 26.1733639 | 0.122202 |
| 119 | H | 0.109167 | 10.7916388 | 21.0993206 | 0.162134 |
| 120 | H | 0.1100677 | 11.0821089 | 9.2247301 | 0.119762 |
| 121 | H | 0.1099144 | 11.3597516 | 23.6201844 | 0.147465 |
| 122 | H | 0.1100572 | 11.3273082 | 11.4117017 | 0.136460 |
| 123 | H | 0.1100477 | 10.8799852 | 4.5260375 | 0.120402 |
| 124 | H | 0.1092505 | 10.6775729 | 16.3827296 | 0.170065 |
| 125 | H | 0.110131 | 10.9434554 | 32.1342198 | 0.116923 |
| 126 | H | 0.1092601 | 10.651726 | 20.2770773 | 0.169514 |

Table S9. Coordinates of i(1,4)-CB[7]

| No | Atom | Coordinates | | | Atomic charge |
| --- | --- | --- | --- | --- | --- |
| X(nm) | Y(nm) | Z(nm) |
| 1 | C | 0.0000000 | 0.0000000 | 0.0000000 | 0.145853 |
| 2 | C | 0.1567825 | 0.0000000 | 0.0000000 | 0.166652 |
| 3 | N | 0.1447192 | 10.33909 | 0.0000000 | -0.484447 |
| 4 | C | 0.1390644 | 11.316153 | 0.1113725 | 0.583265 |
| 5 | N | 0.1448637 | 10.3351249 | 0.0787635 | -0.444961 |
| 6 | N | 0.1448529 | 10.3356947 | 12.2846147 | -0.444348 |
| 7 | C | 0.1393367 | 11.3025405 | 0.1465612 | 0.577541 |
| 8 | N | 0.1447724 | 10.3412203 | 23.9037691 | -0.484990 |
| 9 | O | 0.1212784 | 12.6349987 | 17.5204004 | -0.357180 |
| 10 | O | 0.1212685 | 12.6736626 | 17.4282703 | -0.354184 |
| 11 | C | 0.1437897 | 12.399198 | 17.615554 | 0.139619 |
| 12 | C | 0.1440936 | 12.3426929 | 18.702989 | 0.139151 |
| 13 | C | 0.4474878 | 3.7461543 | 6.1660379 | 0.161619 |
| 14 | C | 0.1556055 | 16.6049228 | 17.7566118 | 0.158508 |
| 15 | N | 0.1460745 | 10.2118756 | 13.7565496 | -0.469456 |
| 16 | C | 0.1388132 | 11.1728376 | 34.4102938 | 0.583448 |
| 17 | N | 0.1461167 | 11.2150766 | 9.0866414 | -0.458148 |
| 18 | N | 0.1462405 | 11.3046595 | 27.1285794 | -0.468228 |
| 19 | C | 0.1389675 | 12.0230323 | 22.340254 | 0.581929 |
| 20 | N | 0.1442162 | 10.2977112 | 14.0213711 | -0.464827 |
| 21 | O | 0.1219321 | 12.6491817 | 18.5842822 | -0.392944 |
| 22 | O | 0.1219177 | 12.6431704 | 34.4883661 | -0.392647 |
| 23 | C | 0.1460109 | 12.4452401 | 18.4343582 | 0.145272 |
| 24 | C | 0.1461435 | 12.4649156 | 18.2472398 | 0.140714 |
| 25 | C | 0.9348168 | 4.3805471 | 6.2132406 | 0.163632 |
| 26 | C | 0.1566228 | 12.0894105 | 19.3109379 | 0.149438 |
| 27 | N | 0.1453787 | 10.3162527 | 5.5136664 | -0.437778 |
| 28 | C | 0.1394847 | 11.2513543 | 0.8565874 | 0.573469 |
| 29 | N | 0.1441054 | 11.3446254 | 2.128827 | -0.485088 |
| 30 | N | 0.1438445 | 11.1797538 | 32.9945852 | -0.479205 |
| 31 | C | 0.1392404 | 12.222626 | 25.7178303 | 0.583157 |
| 32 | N | 0.1445123 | 10.3311957 | 23.0249436 | -0.449194 |
| 33 | O | 0.121299 | 12.6785271 | 17.1959347 | -0.355697 |
| 34 | O | 0.1212418 | 12.6418751 | 0.5448798 | -0.355836 |
| 35 | C | 0.1448389 | 12.3909261 | 16.8252864 | 0.079049 |
| 36 | C | 0.1444217 | 12.5316671 | 18.8199209 | 0.078356 |
| 37 | C | 1.1564842 | 6.8903692 | 5.6869981 | 0.156948 |
| 38 | C | 0.1568485 | 9.4456588 | 18.6316799 | 0.162167 |
| 39 | N | 0.1448149 | 10.3358951 | 5.3971151 | -0.436253 |
| 40 | C | 0.1393231 | 11.2611849 | 0.6981115 | 0.588437 |
| 41 | N | 0.1443405 | 11.5321816 | 8.3150917 | -0.450947 |
| 42 | N | 0.1448015 | 11.5434288 | 28.0487848 | -0.441286 |
| 43 | C | 0.1394678 | 12.049567 | 24.0847711 | 0.585721 |
| 44 | N | 0.1443757 | 10.3451676 | 23.298654 | -0.451409 |
| 45 | O | 0.1213096 | 12.6415849 | 17.1148543 | -0.357514 |
| 46 | O | 0.1212695 | 12.6453656 | 0.9457135 | -0.354661 |
| 47 | C | 0.1445418 | 12.3899298 | 16.7947547 | 0.074138 |
| 48 | C | 0.1445653 | 12.4630937 | 19.0927047 | 0.072760 |
| 49 | C | 1.1530969 | 9.4342637 | 5.5032523 | 0.153157 |
| 50 | C | 0.1566671 | 6.9062325 | 17.9906862 | 0.159421 |
| 51 | N | 0.1445326 | 10.3454529 | 5.9554266 | -0.486149 |
| 52 | C | 0.1391481 | 11.3082094 | 35.6864556 | 0.585349 |
| 53 | N | 0.1446268 | 11.4992149 | 8.272126 | -0.440092 |
| 54 | N | 0.1446044 | 11.5687348 | 27.9628782 | -0.451447 |
| 55 | C | 0.139241 | 12.1490872 | 25.2528324 | 0.583518 |
| 56 | N | 0.1450207 | 10.3274591 | 24.4067031 | -0.481576 |
| 57 | O | 0.1212742 | 12.623931 | 17.6803834 | -0.357456 |
| 58 | O | 0.1212557 | 12.6683751 | 0.2884532 | -0.354736 |
| 59 | C | 0.1437441 | 12.4231111 | 17.6286279 | 0.131513 |
| 60 | C | 0.1441551 | 12.295931 | 18.8048445 | 0.129301 |
| 61 | C | 0.8084369 | 11.1376604 | 5.6011903 | 0.163508 |
| 62 | C | 0.1557527 | 3.5462202 | 17.4077626 | 0.148156 |
| 63 | N | 0.1460236 | 10.2502208 | 12.6930436 | -0.463634 |
| 64 | C | 0.1389827 | 11.1578982 | 34.5083522 | 0.581317 |
| 65 | N | 0.1461588 | 11.2489867 | 8.9380974 | -0.456415 |
| 66 | N | 0.1460921 | 11.2724146 | 27.0502321 | -0.468287 |
| 67 | C | 0.13879 | 12.0520615 | 22.1053664 | 0.576541 |
| 68 | N | 0.1444199 | 10.3079492 | 13.8400292 | -0.451784 |
| 69 | O | 0.1219545 | 12.6251849 | 18.6468058 | -0.394450 |
| 70 | O | 0.1219088 | 12.6370375 | 34.5539373 | -0.390443 |
| 71 | C | 0.1464532 | 12.4308457 | 18.9013312 | 0.126325 |
| 72 | C | 0.145918 | 12.3658702 | 18.6630274 | 0.129488 |
| 73 | C | 0.5090351 | 14.6674365 | 6.1563623 | 0.166891 |
| 74 | C | 0.1564532 | 1.8301521 | 18.0116282 | 0.136289 |
| 75 | N | 0.1456193 | 10.2905261 | 6.0536303 | -0.435408 |
| 76 | C | 0.1394757 | 11.2367221 | 1.0756057 | 0.576692 |
| 77 | N | 0.1440277 | 11.3527406 | 1.5565705 | -0.483340 |
| 78 | N | 0.1439508 | 11.171384 | 32.3361183 | -0.479218 |
| 79 | C | 0.1391518 | 12.2478426 | 25.8589056 | 0.589215 |
| 80 | N | 0.1443643 | 10.3361844 | 22.7812582 | -0.451435 |
| 81 | O | 0.1213214 | 12.6827699 | 17.1364099 | -0.357941 |
| 82 | O | 0.1212231 | 12.653885 | 0.4782291 | -0.354381 |
| 83 | C | 0.1444216 | 12.4486082 | 19.1222959 | 0.078442 |
| 84 | C | 0.1446989 | 12.4675138 | 16.9307521 | 0.062720 |
| 85 | H | 0.1100406 | 11.318281 | 24.1856214 | 0.141303 |
| 86 | H | 0.10991 | 11.3617035 | 11.9977909 | 0.148068 |
| 87 | H | 0.1091271 | 10.9263696 | 21.0030052 | 0.163509 |
| 88 | H | 0.1100155 | 10.8245376 | 32.8152859 | 0.121000 |
| 89 | H | 0.1098702 | 10.8000185 | 3.3274006 | 0.124405 |
| 90 | H | 0.1092759 | 10.9264096 | 15.1490294 | 0.162233 |
| 91 | H | 0.1093418 | 11.3099749 | 13.8607499 | 0.162344 |
| 92 | H | 0.1093329 | 11.3284197 | 25.978563 | 0.166626 |
| 93 | H | 0.1097999 | 11.0235904 | 26.0730189 | 0.123958 |
| 94 | H | 0.1092501 | 10.7373237 | 14.2324296 | 0.159429 |
| 95 | H | 0.1091637 | 10.7828011 | 21.0038542 | 0.162986 |
| 96 | H | 0.1100834 | 11.0766049 | 9.1385989 | 0.121569 |
| 97 | H | 0.1098837 | 11.3642971 | 23.3148928 | 0.148673 |
| 98 | H | 0.110024 | 11.3289734 | 11.1245527 | 0.138209 |
| 99 | H | 0.1100914 | 10.9129989 | 32.036863 | 0.120904 |
| 100 | H | 0.1092563 | 10.6693265 | 20.168133 | 0.169420 |
| 101 | H | 0.1092367 | 10.7002322 | 16.2025378 | 0.171729 |
| 102 | H | 0.1100355 | 10.8546463 | 4.3422791 | 0.120837 |
| 103 | H | 0.1101254 | 11.3300357 | 23.6097266 | 0.134442 |
| 104 | H | 0.1101226 | 11.3195198 | 11.4054441 | 0.134035 |
| 105 | H | 0.109264 | 10.6846018 | 20.1154952 | 0.169262 |
| 106 | H | 0.1101721 | 10.9139084 | 31.9848244 | 0.118370 |
| 107 | H | 0.1099715 | 10.8807842 | 4.2231696 | 0.123895 |
| 108 | H | 0.1092403 | 10.6719301 | 16.0978929 | 0.175166 |
| 109 | H | 0.1100478 | 11.324153 | 24.686738 | 0.138517 |
| 110 | H | 0.1099104 | 11.3590322 | 12.503156 | 0.150360 |
| 111 | H | 0.1091459 | 10.9209202 | 20.8607054 | 0.166751 |
| 112 | H | 0.1099949 | 10.8163728 | 32.6533685 | 0.122458 |
| 113 | H | 0.109942 | 10.8258188 | 3.2513655 | 0.126292 |
| 114 | H | 0.1092703 | 10.915165 | 15.0750046 | 0.167890 |
| 115 | H | 0.1093103 | 11.317202 | 13.672168 | 0.168152 |
| 116 | H | 0.1093237 | 11.328926 | 25.7719032 | 0.167283 |
| 117 | H | 0.1092619 | 10.7551644 | 13.6529789 | 0.164366 |
| 118 | H | 0.1097624 | 11.0120902 | 25.4748764 | 0.127931 |
| 119 | H | 0.1091402 | 10.7603453 | 20.3207837 | 0.166774 |
| 120 | H | 0.1100882 | 11.0881491 | 8.4359921 | 0.121286 |
| 121 | H | 0.1098754 | 11.3648243 | 23.0522701 | 0.150147 |
| 122 | H | 0.1100186 | 11.3331903 | 10.8622676 | 0.143130 |
| 123 | H | 0.1101286 | 10.8950817 | 4.1052226 | 0.120540 |
| 124 | H | 0.1092758 | 10.6950655 | 15.968968 | 0.169073 |
| 125 | H | 0.1099284 | 10.9097529 | 31.7421469 | 0.129673 |
| 126 | H | 0.1092282 | 10.6492869 | 19.8873791 | 0.177737 |

Table S10. Coordinates of CB[8]

| No | Atom | Coordinates | | | Atomic charge |
| --- | --- | --- | --- | --- | --- |
| X(nm) | Y(nm) | Z(nm) |
| 1 | C | 0.0000000 | 0.0000000 | 0.0000000 | 0.154328 |
| 2 | C | 0.1567439 | 0.0000000 | 0.0000000 | 0.158850 |
| 3 | N | 0.1445604 | 10.3437575 | 0.0000000 | -0.441215 |
| 4 | C | 0.139262 | 11.2770458 | 35.6295379 | 0.594901 |
| 5 | N | 0.1446018 | 10.3557223 | 35.9862663 | -0.436382 |
| 6 | N | 0.1445785 | 10.3546264 | 23.7615734 | -0.437064 |
| 7 | C | 0.1393047 | 11.2673018 | 35.629261 | 0.595197 |
| 8 | N | 0.1445658 | 10.3448783 | 12.2196497 | -0.441129 |
| 9 | O | 0.1213252 | 12.6343798 | 18.896133 | -0.359599 |
| 10 | O | 0.1213145 | 12.6389893 | 18.8893058 | -0.359556 |
| 11 | C | 0.1445255 | 12.4041784 | 19.2970436 | 0.060150 |
| 12 | C | 0.1445256 | 12.4020807 | 16.6893644 | 0.061403 |
| 13 | C | 0.5069748 | 1.6124818 | 29.8787997 | 0.141950 |
| 14 | C | 0.1567354 | 15.0310286 | 17.9982276 | 0.157391 |
| 15 | N | 0.1446471 | 10.3454943 | 29.9240407 | -0.436694 |
| 16 | C | 0.1392994 | 11.2701679 | 35.5839207 | 0.593724 |
| 17 | N | 0.1445082 | 11.5288033 | 27.9789749 | -0.435567 |
| 18 | N | 0.144513 | 11.5268648 | 8.0401713 | -0.435094 |
| 19 | C | 0.1392738 | 12.1035452 | 11.8611384 | 0.593859 |
| 20 | N | 0.1445997 | 10.3463985 | 12.2622641 | -0.437755 |
| 21 | O | 0.1213194 | 12.6382638 | 18.9177833 | -0.359280 |
| 22 | O | 0.1213236 | 12.636096 | 35.205904 | -0.359455 |
| 23 | C | 0.1445444 | 12.3909328 | 19.3855028 | 0.061329 |
| 24 | C | 0.144527 | 12.3999603 | 16.6234554 | 0.061367 |
| 25 | C | 0.935463 | 3.8711581 | 29.8714776 | 0.154185 |
| 26 | C | 0.1567399 | 12.8656107 | 18.0189598 | 0.158796 |
| 27 | N | 0.1445619 | 10.3445663 | 29.8908676 | -0.441367 |
| 28 | C | 0.1392653 | 11.2764778 | 35.6306168 | 0.595159 |
| 29 | N | 0.1444992 | 11.5203557 | 28.0116447 | -0.436786 |
| 30 | N | 0.1445102 | 11.5210989 | 7.9749959 | -0.436494 |
| 31 | C | 0.1393114 | 12.0894132 | 11.9540649 | 0.594846 |
| 32 | N | 0.1445749 | 10.3442174 | 12.2268309 | -0.440812 |
| 33 | O | 0.1213135 | 12.6342087 | 18.8881871 | -0.359557 |
| 34 | O | 0.1213242 | 12.6390088 | 35.1604672 | -0.359627 |
| 35 | C | 0.1445188 | 12.4033259 | 19.3063809 | 0.061589 |
| 36 | C | 0.1445319 | 12.4005623 | 16.6888736 | 0.060080 |
| 37 | C | 1.2231341 | 6.1213664 | 29.8621761 | 0.141890 |
| 38 | C | 0.1567343 | 10.543409 | 18.0201413 | 0.157458 |
| 39 | N | 0.1445931 | 10.3465619 | 29.8483552 | -0.437887 |
| 40 | C | 0.1392881 | 11.2745477 | 35.6551391 | 0.593682 |
| 41 | N | 0.1445217 | 11.5268848 | 27.9714246 | -0.434787 |
| 42 | N | 0.1445038 | 11.5278944 | 8.0292635 | -0.435762 |
| 43 | C | 0.1392608 | 12.1112804 | 11.7982794 | 0.593716 |
| 44 | N | 0.1446539 | 10.3456406 | 12.1812589 | -0.436444 |
| 45 | O | 0.1213264 | 12.6379598 | 18.8848246 | -0.359396 |
| 46 | O | 0.1213219 | 12.635344 | 35.2408563 | -0.359323 |
| 47 | C | 0.1445265 | 12.400723 | 19.3774483 | 0.061490 |
| 48 | C | 0.1445487 | 12.3890398 | 16.6099011 | 0.061267 |
| 49 | C | 1.3232684 | 8.3709905 | 29.8580977 | 0.154302 |
| 50 | C | 0.156744 | 8.3710443 | 17.9939872 | 0.158747 |
| 51 | N | 0.144576 | 10.3440623 | 29.86681 | -0.440834 |
| 52 | C | 0.1392669 | 11.2757411 | 35.6117479 | 0.594968 |
| 53 | N | 0.1445075 | 11.5219479 | 28.029466 | -0.436755 |
| 54 | N | 0.1444983 | 11.519162 | 7.9920013 | -0.436647 |
| 55 | C | 0.1393114 | 12.0894879 | 11.9485203 | 0.595157 |
| 56 | N | 0.1445588 | 10.3447533 | 12.2396612 | -0.441427 |
| 57 | O | 0.1213179 | 12.6345752 | 18.9024743 | -0.359589 |
| 58 | O | 0.1213189 | 12.6391032 | 35.1563691 | -0.359583 |
| 59 | C | 0.1445293 | 12.4007575 | 19.303427 | 0.060179 |
| 60 | C | 0.1445236 | 12.4035228 | 16.6928922 | 0.061366 |
| 61 | C | 1.2233276 | 10.6238212 | 29.8622406 | 0.142048 |
| 62 | C | 0.1567374 | 6.0407454 | 17.9787206 | 0.157290 |
| 63 | N | 0.1446396 | 10.3456326 | 29.8949205 | -0.436772 |
| 64 | C | 0.1393075 | 11.2711414 | 35.591727 | 0.593811 |
| 65 | N | 0.1445053 | 11.5278952 | 27.9705186 | -0.435597 |
| 66 | N | 0.1445178 | 11.528027 | 8.0345136 | -0.435209 |
| 67 | C | 0.1392717 | 12.1037987 | 11.8540337 | 0.593800 |
| 68 | N | 0.1446066 | 10.3466399 | 12.2559751 | -0.437591 |
| 69 | O | 0.1213249 | 12.6390681 | 18.9099101 | -0.359365 |
| 70 | O | 0.1213236 | 12.6359037 | 35.2096895 | -0.359371 |
| 71 | C | 0.1445378 | 12.3922871 | 19.3831581 | 0.061288 |
| 72 | C | 0.1445307 | 12.39905 | 16.6184364 | 0.061439 |
| 72 | C | 0.9356544 | 12.8694839 | 29.8710615 | 0.154200 |
| 73 | C | 0.1567412 | 3.8644688 | 17.9841524 | 0.158823 |
| 74 | N | 0.1445534 | 10.3446084 | 29.8890386 | -0.441344 |
| 75 | C | 0.139264 | 11.2766572 | 35.6342229 | 0.595044 |
| 76 | N | 0.1445009 | 11.519723 | 28.0156348 | -0.436567 |
| 77 | N | 0.1445051 | 11.521947 | 7.9771042 | -0.436705 |
| 78 | C | 0.1393061 | 12.0907747 | 11.9462049 | 0.594940 |
| 79 | N | 0.1445692 | 10.3443763 | 12.2201765 | -0.440853 |
| 80 | O | 0.1213179 | 12.6341587 | 18.8879341 | -0.359565 |
| 81 | O | 0.1213236 | 12.6388363 | 35.1664896 | -0.359681 |
| 82 | C | 0.1445206 | 12.4039226 | 19.3063098 | 0.061458 |
| 83 | C | 0.144531 | 12.4009378 | 16.6896327 | 0.060263 |
| 84 | C | 0.5063125 | 15.127815 | 29.8805237 | 0.141885 |
| 85 | C | 0.1567342 | 1.5502913 | 18.0042355 | 0.157454 |
| 86 | N | 0.1445934 | 10.3460447 | 29.8808377 | -0.437864 |
| 87 | C | 0.1392842 | 11.2747011 | 35.6500079 | 0.593786 |
| 88 | N | 0.1445205 | 11.52713 | 27.971547 | -0.434846 |
| 89 | N | 0.1445021 | 11.5280057 | 8.0293259 | -0.435673 |
| 90 | C | 0.1392625 | 12.1102758 | 11.8060833 | 0.593625 |
| 91 | N | 0.1446511 | 10.3461784 | 12.1878319 | -0.436459 |
| 92 | O | 0.1213232 | 12.6381854 | 18.8871346 | -0.359485 |
| 93 | O | 0.1213203 | 12.6353639 | 35.2381393 | -0.359360 |
| 94 | C | 0.1445153 | 12.3886113 | 16.5726298 | 0.061374 |
| 95 | C | 0.144493 | 12.3940385 | 19.4039765 | 0.061418 |
| 96 | H | 0.1101934 | 11.3176711 | 11.8738045 | 0.131673 |
| 97 | H | 0.1101951 | 11.3125865 | 24.1028724 | 0.131973 |
| 98 | H | 0.1102013 | 10.8875689 | 4.2383714 | 0.120250 |
| 99 | H | 0.1092618 | 10.6917247 | 16.1067195 | 0.173960 |
| 100 | H | 0.1102094 | 10.8863882 | 31.7781829 | 0.119741 |
| 101 | H | 0.109262 | 10.694 | 19.9103449 | 0.173516 |
| 102 | H | 0.1102256 | 11.3230545 | 11.9205636 | 0.134890 |
| 103 | H | 0.1101956 | 11.3277992 | 24.1497861 | 0.132884 |
| 104 | H | 0.1092452 | 10.6858343 | 16.152537 | 0.171884 |
| 105 | H | 0.1102406 | 10.8913528 | 4.2835148 | 0.120649 |
| 106 | H | 0.1092474 | 10.686377 | 19.833494 | 0.172283 |
| 107 | H | 0.1102384 | 10.8906094 | 31.7018329 | 0.120622 |
| 108 | H | 0.110194 | 11.3176431 | 11.8817631 | 0.131715 |
| 109 | H | 0.1102009 | 11.3125267 | 24.1103726 | 0.131919 |
| 110 | H | 0.1102117 | 10.8861993 | 4.234174 | 0.119692 |
| 111 | H | 0.1092632 | 10.693931 | 16.1016797 | 0.173458 |
| 112 | H | 0.1102064 | 10.8882546 | 31.7700336 | 0.120263 |
| 113 | H | 0.1092648 | 10.6919533 | 19.901265 | 0.173955 |
| 114 | H | 0.1102257 | 11.3230791 | 11.8396791 | 0.134855 |
| 115 | H | 0.1101967 | 11.327647 | 24.0667046 | 0.132844 |
| 116 | H | 0.1102378 | 10.8904478 | 4.3029992 | 0.120666 |
| 117 | H | 0.1092503 | 10.6861535 | 16.1711709 | 0.172299 |
| 118 | H | 0.1102458 | 10.8917841 | 31.7198392 | 0.120598 |
| 119 | H | 0.1092473 | 10.6863005 | 19.8504602 | 0.171845 |
| 120 | H | 0.1102008 | 11.3177588 | 11.8950921 | 0.131688 |
| 121 | H | 0.1101978 | 11.3125722 | 24.1234631 | 0.131954 |
| 123 | H | 0.109262 | 10.6921107 | 16.0987763 | 0.173914 |
| 124 | H | 0.1102044 | 10.8880555 | 4.2301494 | 0.120152 |
| 125 | H | 0.1092604 | 10.6935426 | 19.904577 | 0.173564 |
| 126 | H | 0.1102076 | 10.8860472 | 31.772246 | 0.119840 |
| 127 | H | 0.1102253 | 11.3231739 | 11.9147754 | 0.134927 |
| 128 | H | 0.1101957 | 11.3279297 | 24.1433941 | 0.132889 |
| 129 | H | 0.1102417 | 10.8912075 | 4.2871212 | 0.120637 |
| 130 | H | 0.1092476 | 10.6861148 | 16.156403 | 0.171900 |
| 131 | H | 0.1092488 | 10.6862657 | 19.8355873 | 0.172264 |
| 132 | H | 0.1102381 | 10.8904154 | 31.7038236 | 0.120648 |
| 133 | H | 0.1101963 | 11.3177216 | 11.8749017 | 0.131677 |
| 134 | H | 0.1101933 | 11.3125069 | 24.1037133 | 0.131943 |
| 135 | H | 0.10926 | 10.6936806 | 16.1018841 | 0.173521 |
| 136 | H | 0.1102087 | 10.8862145 | 4.23437 | 0.119763 |
| 137 | H | 0.1102035 | 10.8879762 | 31.7699963 | 0.120208 |
| 138 | H | 0.1092613 | 10.692281 | 19.9013209 | 0.173902 |
| 139 | H | 0.1102257 | 11.3229229 | 11.8463598 | 0.134863 |
| 140 | H | 0.1101962 | 11.3275569 | 24.0733972 | 0.132835 |
| 141 | H | 0.110241 | 10.8955909 | 31.7304634 | 0.120610 |
| 142 | H | 0.1092507 | 10.690129 | 19.8572533 | 0.172273 |
| 143 | H | 0.1092457 | 10.690756 | 16.1616981 | 0.171886 |
| 144 | H | 0.1102405 | 10.8943597 | 4.2884739 | 0.120609 |

Table S11. Coordinates of i-CB[8]

| No | Atom | Coordinates | | | Atomic charge |
| --- | --- | --- | --- | --- | --- |
| X(nm) | Y(nm) | Z(nm) |
| 1 | C | 0.0000000 | 0.0000000 | 0.0000000 | 0.160892 |
| 2 | C | 0.1568203 | 0.0000000 | 0.0000000 | 0.145088 |
| 3 | N | 0.1444209 | 10.3502345 | 0.0000000 | -0.441828 |
| 4 | C | 0.1392274 | 11.2825925 | 35.872995 | 0.592095 |
| 5 | N | 0.1447546 | 10.3455925 | 35.7237756 | -0.435735 |
| 6 | N | 0.144445 | 10.3477773 | 23.5014868 | -0.440623 |
| 7 | C | 0.1392405 | 11.2853861 | 35.8500683 | 0.590887 |
| 8 | N | 0.1447521 | 10.3403918 | 11.9498604 | -0.434230 |
| 9 | O | 0.1213174 | 12.6346364 | 18.7599173 | -0.359015 |
| 10 | O | 0.1213253 | 12.6321988 | 18.8039031 | -0.360052 |
| 11 | C | 0.1443574 | 12.4128233 | 19.3711391 | 0.078472 |
| 12 | C | 0.1446973 | 12.3733863 | 16.662283 | 0.056105 |
| 13 | C | 0.5068596 | 1.5789472 | 29.9292408 | 0.146325 |
| 14 | C | 0.1564982 | 15.0160131 | 18.0735062 | 0.158420 |
| 15 | N | 0.1440915 | 10.3371776 | 28.8427365 | -0.448555 |
| 16 | C | 0.1391414 | 11.2889031 | 0.5919618 | 0.591659 |
| 17 | N | 0.1447924 | 11.5086124 | 27.9092928 | -0.426377 |
| 18 | N | 0.1443481 | 11.5450035 | 7.9440334 | -0.445938 |
| 19 | C | 0.1391404 | 12.1931748 | 10.8241976 | 0.591585 |
| 20 | N | 0.1452848 | 10.310389 | 11.1561731 | -0.424160 |
| 21 | O | 0.1213101 | 12.6256048 | 18.4322208 | -0.358934 |
| 22 | O | 0.1213044 | 12.626939 | 35.7582825 | -0.358722 |
| 23 | C | 0.1443564 | 12.4906321 | 19.2526609 | 0.062693 |
| 24 | C | 0.1447946 | 12.2919662 | 16.6327759 | 0.064943 |
| 25 | C | 0.933468 | 3.8597849 | 30.1329238 | 0.155912 |
| 26 | C | 0.1568337 | 12.7986101 | 17.4523868 | 0.148289 |
| 27 | N | 0.1445171 | 10.3436005 | 29.4231092 | -0.440321 |
| 28 | C | 0.1392408 | 11.2834191 | 35.7260584 | 0.591246 |
| 29 | N | 0.1446673 | 11.5502404 | 28.1146932 | -0.435072 |
| 30 | N | 0.1443746 | 11.5049113 | 8.1107091 | -0.439048 |
| 31 | C | 0.1392572 | 12.1185747 | 11.6878226 | 0.591195 |
| 32 | N | 0.1446652 | 10.3472241 | 12.0898633 | -0.436433 |
| 33 | O | 0.1213246 | 12.6343607 | 18.8626719 | -0.360083 |
| 34 | O | 0.121317 | 12.6375731 | 35.2239212 | -0.358817 |
| 35 | C | 0.1445237 | 12.4156727 | 19.2858049 | 0.053905 |
| 36 | C | 0.1444622 | 12.3631706 | 16.5344684 | 0.082725 |
| 37 | C | 1.2201838 | 6.1059827 | 30.4219181 | 0.148056 |
| 38 | C | 0.1565604 | 10.5749975 | 17.3332089 | 0.153377 |
| 39 | N | 0.1452714 | 10.3191699 | 30.5971437 | -0.423178 |
| 40 | C | 0.1397064 | 11.1893839 | 34.8012535 | 0.588493 |
| 41 | N | 0.1444821 | 11.5512519 | 28.1654083 | -0.443448 |
| 42 | N | 0.1447425 | 11.4990283 | 8.1689383 | -0.429297 |
| 43 | C | 0.1394349 | 12.00558 | 12.6074929 | 0.591968 |
| 44 | N | 0.1440974 | 10.3350885 | 13.16869 | -0.449429 |
| 45 | O | 0.1213023 | 12.6396814 | 19.2349864 | -0.357615 |
| 46 | O | 0.1213248 | 12.6539854 | 34.732641 | -0.359591 |
| 47 | C | 0.144885 | 12.2925409 | 19.4896111 | 0.061201 |
| 48 | C | 0.1442251 | 12.4987753 | 16.8321434 | 0.064187 |
| 49 | C | 1.320458 | 8.3541423 | 30.6117237 | 0.142452 |
| 50 | C | 0.1563966 | 8.3031147 | 17.8364592 | 0.156115 |
| 51 | N | 0.1450408 | 10.3363974 | 30.9245523 | -0.476454 |
| 52 | C | 0.1394198 | 11.2574335 | 35.1935102 | 0.584344 |
| 53 | N | 0.1443132 | 11.5230092 | 27.8299048 | -0.443544 |
| 54 | N | 0.1448818 | 11.5423523 | 7.8058816 | -0.428737 |
| 55 | C | 0.1395136 | 12.0176435 | 12.3344712 | 0.578766 |
| 56 | N | 0.1442986 | 10.3526746 | 12.7721719 | -0.486501 |
| 57 | O | 0.1212553 | 12.6337102 | 18.9023401 | -0.356288 |
| 58 | O | 0.1212927 | 12.6727653 | 34.7277692 | -0.357709 |
| 59 | C | 0.1437577 | 12.2817661 | 18.9676938 | 0.139498 |
| 60 | C | 0.1440091 | 12.3381989 | 17.1893812 | 0.142879 |
| 61 | C | 1.0735116 | 10.184651 | 30.431364 | 0.162600 |
| 62 | C | 0.15591 | 5.7065206 | 18.9141106 | 0.150795 |
| 63 | N | 0.1464464 | 10.1659936 | 23.458027 | -0.467196 |
| 64 | C | 0.1386693 | 11.1683284 | 1.7075724 | 0.582854 |
| 65 | N | 0.1463923 | 11.2163871 | 26.9876085 | -0.457775 |
| 66 | N | 0.1458572 | 11.3600109 | 8.7537514 | -0.471001 |
| 67 | C | 0.138666 | 12.0286784 | 13.7998376 | 0.584607 |
| 68 | N | 0.1442348 | 10.2917519 | 21.8308953 | -0.459945 |
| 69 | O | 0.1220227 | 12.660948 | 17.3796567 | -0.396728 |
| 70 | O | 0.1220155 | 12.660289 | 1.0952303 | -0.396988 |
| 71 | C | 0.1458599 | 12.5411711 | 17.8645322 | 0.138278 |
| 72 | C | 0.1463178 | 12.5576103 | 17.8847356 | 0.142187 |
| 72 | C | 0.935639 | 12.8816577 | 29.9075645 | 0.161049 |
| 73 | C | 0.1562833 | 3.8374538 | 18.4106884 | 0.137018 |
| 74 | N | 0.1453798 | 10.3143376 | 29.7964589 | -0.426066 |
| 75 | C | 0.13959 | 11.2283468 | 34.9915481 | 0.577076 |
| 76 | N | 0.1440267 | 11.3725115 | 33.7438296 | -0.483729 |
| 77 | N | 0.1438416 | 11.2010991 | 2.554547 | -0.477664 |
| 78 | C | 0.1394683 | 12.1878325 | 11.0577548 | 0.587753 |
| 79 | N | 0.1443859 | 10.3381029 | 13.0749811 | -0.449363 |
| 80 | O | 0.1213014 | 12.6755147 | 18.9520338 | -0.358239 |
| 81 | O | 0.1212425 | 12.6381018 | 35.0451513 | -0.356285 |
| 82 | C | 0.1449284 | 12.3194024 | 19.4171149 | 0.064180 |
| 83 | C | 0.1443105 | 12.4867283 | 16.7949226 | 0.069532 |
| 84 | C | 0.5060786 | 15.1166513 | 29.6612958 | 0.148633 |
| 85 | C | 0.156628 | 1.5528653 | 17.9592346 | 0.159540 |
| 86 | N | 0.1450898 | 10.3265741 | 29.8650324 | -0.429062 |
| 87 | C | 0.1394204 | 11.2213973 | 34.985441 | 0.592339 |
| 88 | N | 0.1441986 | 11.5264077 | 27.9280192 | -0.448934 |
| 89 | N | 0.1448584 | 11.5347567 | 7.8651522 | -0.428112 |
| 90 | C | 0.1396323 | 11.9659668 | 12.6520764 | 0.588208 |
| 91 | N | 0.1442111 | 10.3468002 | 13.0122136 | -0.444182 |
| 92 | O | 0.1213267 | 12.6507089 | 19.0888282 | -0.359885 |
| 93 | O | 0.1213147 | 12.6385189 | 34.7536086 | -0.358573 |
| 94 | C | 0.1445001 | 12.3473141 | 16.5262256 | 0.070008 |
| 95 | C | 0.144488 | 12.4191785 | 19.3268761 | 0.060007 |
| 96 | H | 0.1101941 | 11.3153963 | 11.6086844 | 0.131113 |
| 97 | H | 0.1101903 | 11.3154973 | 23.8309631 | 0.135523 |
| 98 | H | 0.1102704 | 10.8684938 | 4.1906892 | 0.114698 |
| 99 | H | 0.1092456 | 10.7195449 | 16.056341 | 0.168055 |
| 100 | H | 0.1101113 | 10.9155618 | 31.7201773 | 0.122473 |
| 101 | H | 0.1092366 | 10.6664498 | 19.8393376 | 0.178570 |
| 102 | H | 0.1101746 | 11.3303496 | 10.8348532 | 0.134045 |
| 103 | H | 0.1101733 | 11.3354312 | 23.045061 | 0.131025 |
| 104 | H | 0.10924 | 10.7122106 | 16.2481338 | 0.176870 |
| 105 | H | 0.1101059 | 10.8361941 | 4.3825486 | 0.120709 |
| 106 | H | 0.1092533 | 10.6792999 | 19.988603 | 0.167654 |
| 107 | H | 0.1102835 | 10.9132737 | 31.8564115 | 0.118121 |
| 108 | H | 0.1101959 | 11.3143207 | 11.7492099 | 0.132815 |
| 109 | H | 0.1101922 | 11.3166853 | 23.9744549 | 0.134205 |
| 110 | H | 0.1101025 | 10.9052049 | 4.3873857 | 0.123106 |
| 111 | H | 0.1092353 | 10.6708827 | 16.2711369 | 0.180111 |
| 112 | H | 0.1102937 | 10.8814668 | 31.9030162 | 0.113458 |
| 113 | H | 0.109245 | 10.718175 | 20.028931 | 0.165964 |
| 114 | H | 0.110176 | 11.3320215 | 12.8477845 | 0.134214 |
| 115 | H | 0.1101658 | 11.3259026 | 25.0731621 | 0.133901 |
| 116 | H | 0.1102213 | 10.9279136 | 4.0925705 | 0.122611 |
| 117 | H | 0.1092455 | 10.6663757 | 15.9531654 | 0.170864 |
| 118 | H | 0.1101289 | 10.860318 | 31.5192519 | 0.122114 |
| 119 | H | 0.1092512 | 10.7060193 | 19.6655694 | 0.175319 |
| 120 | H | 0.1100997 | 11.3231308 | 12.5106035 | 0.139840 |
| 121 | H | 0.1099677 | 11.3640056 | 24.7021838 | 0.148430 |
| 123 | H | 0.1091749 | 10.8650387 | 15.0352837 | 0.161383 |
| 124 | H | 0.1100775 | 10.9053155 | 3.231823 | 0.123214 |
| 125 | H | 0.1092606 | 10.9298627 | 20.7354479 | 0.160262 |
| 126 | H | 0.1098854 | 10.7629249 | 32.5434911 | 0.121875 |
| 127 | H | 0.1093037 | 11.3256682 | 21.9637517 | 0.168223 |
| 128 | H | 0.1092993 | 11.3331521 | 9.8569701 | 0.171587 |
| 129 | H | 0.1098466 | 11.0113315 | 9.8084086 | 0.122748 |
| 130 | H | 0.1092615 | 10.7246294 | 21.6348749 | 0.162470 |
| 131 | H | 0.1091749 | 10.8154557 | 14.5315299 | 0.161393 |
| 132 | H | 0.1101107 | 11.0378206 | 26.3802286 | 0.121130 |
| 133 | H | 0.1099502 | 11.3682195 | 12.7999832 | 0.146778 |
| 134 | H | 0.1100808 | 11.3250234 | 24.9795869 | 0.140294 |
| 135 | H | 0.1092595 | 10.6715642 | 16.0456497 | 0.174017 |
| 136 | H | 0.1101729 | 10.9224755 | 4.1869557 | 0.122285 |
| 137 | H | 0.1101851 | 10.8506944 | 31.5516881 | 0.121370 |
| 138 | H | 0.1092373 | 10.7162061 | 19.7079499 | 0.172435 |
| 139 | H | 0.1101685 | 11.3193976 | 12.6965395 | 0.134630 |
| 140 | H | 0.1101811 | 11.3352871 | 24.9016576 | 0.130644 |
| 141 | H | 0.1102989 | 10.889512 | 31.8860209 | 0.116643 |
| 142 | H | 0.1092519 | 10.7125882 | 20.011139 | 0.166194 |
| 143 | H | 0.1092424 | 10.6793113 | 16.263246 | 0.177189 |
| 144 | H | 0.1101125 | 10.8956838 | 4.3798705 | 0.122457 |

Table S12. Coordinates of i(1,5)-CB[8]

| No | Atom | Coordinates | | | Atomic charge |
| --- | --- | --- | --- | --- | --- |
| X(nm) | Y(nm) | Z(nm) |
| 1 | C | 0.0000000 | 0.0000000 | 0.0000000 | 0.148672 |
| 2 | C | 0.1569039 | 0.0000000 | 0.0000000 | 0.166587 |
| 3 | N | 0.1453082 | 10.3572156 | 0.0000000 | -0.481567 |
| 4 | C | 0.1396839 | 11.2339699 | 35.4634501 | 0.582644 |
| 5 | N | 0.1446586 | 10.325032 | 0.3810973 | -0.443445 |
| 6 | N | 0.1448181 | 10.3575369 | 24.1963982 | -0.438639 |
| 7 | C | 0.1395758 | 11.26141 | 35.5102811 | 0.587952 |
| 8 | N | 0.1444663 | 10.3126776 | 12.5143799 | -0.474783 |
| 9 | O | 0.1214289 | 12.6248798 | 18.6902917 | -0.364163 |
| 10 | O | 0.1212726 | 12.6477502 | 18.7109961 | -0.357866 |
| 11 | C | 0.1441736 | 12.3705945 | 19.7684201 | 0.130155 |
| 12 | C | 0.144024 | 12.4095417 | 17.7468968 | 0.127868 |
| 13 | C | 0.4659845 | 3.2002569 | 30.4137826 | 0.183494 |
| 14 | C | 0.1559343 | 17.8888609 | 20.9643852 | 0.132670 |
| 15 | N | 0.1465802 | 10.2053173 | 17.9907767 | -0.467913 |
| 16 | C | 0.1387749 | 11.17278 | 1.554633 | 0.569657 |
| 17 | N | 0.1466581 | 11.1487743 | 29.0496703 | -0.488427 |
| 18 | N | 0.1453182 | 11.3554797 | 8.9185681 | -0.447975 |
| 19 | C | 0.1387576 | 11.9736888 | 15.2257819 | 0.579423 |
| 20 | N | 0.1443112 | 10.3098047 | 22.6241108 | -0.435379 |
| 21 | O | 0.1219427 | 12.6401185 | 16.7481368 | -0.391070 |
| 22 | O | 0.1219024 | 12.6960607 | 34.1926051 | -0.389851 |
| 23 | C | 0.1465801 | 12.4599008 | 17.1674603 | 0.140639 |
| 24 | C | 0.1460855 | 12.3776768 | 17.2391038 | 0.130621 |
| 25 | C | 0.9596765 | 3.136893 | 30.3262165 | 0.158526 |
| 26 | C | 0.1562827 | 12.6899462 | 15.2882302 | 0.131925 |
| 27 | N | 0.1456709 | 10.2933453 | 31.0375964 | -0.427324 |
| 28 | C | 0.1394833 | 11.2263436 | 34.8790224 | 0.573497 |
| 29 | N | 0.1438592 | 11.3526082 | 34.4494936 | -0.485514 |
| 30 | N | 0.1438615 | 11.1863062 | 3.6524915 | -0.474394 |
| 31 | C | 0.139178 | 12.2419439 | 10.2119112 | 0.590360 |
| 32 | N | 0.144277 | 10.3355609 | 13.2603159 | -0.450194 |
| 33 | O | 0.1213647 | 12.6881217 | 18.8958002 | -0.360242 |
| 34 | O | 0.1212127 | 12.6498784 | 35.491621 | -0.355883 |
| 35 | C | 0.1449862 | 12.3407646 | 19.2341414 | 0.065847 |
| 36 | C | 0.144275 | 12.5324675 | 16.9612523 | 0.074652 |
| 37 | C | 1.2278661 | 5.3064375 | 31.45175 | 0.144540 |
| 38 | C | 0.156666 | 10.0949961 | 16.9462317 | 0.157713 |
| 39 | N | 0.1452759 | 10.3105945 | 31.514306 | -0.431672 |
| 40 | C | 0.1394927 | 11.2107401 | 34.8459282 | 0.589923 |
| 41 | N | 0.1442251 | 11.5371368 | 27.8665341 | -0.448832 |
| 42 | N | 0.1449553 | 11.5442194 | 7.9560053 | -0.431370 |
| 43 | C | 0.1396719 | 11.9715527 | 12.5229998 | 0.590518 |
| 44 | N | 0.14409 | 10.3364987 | 13.2194461 | -0.449933 |
| 45 | O | 0.1213431 | 12.6490505 | 19.0870603 | -0.360926 |
| 46 | O | 0.1212689 | 12.6424109 | 34.7917967 | -0.356841 |
| 47 | C | 0.1448032 | 12.347985 | 19.2849822 | 0.081514 |
| 48 | C | 0.1445215 | 12.5104701 | 16.9815438 | 0.061217 |
| 49 | C | 1.2808609 | 7.6242989 | 31.6940645 | 0.148676 |
| 50 | C | 0.1569039 | 7.6242989 | 18.308676 | 0.166583 |
| 51 | N | 0.1453082 | 10.3572156 | 31.6940645 | -0.481569 |
| 52 | C | 0.1396839 | 11.2339699 | 35.4634501 | 0.582644 |
| 53 | N | 0.1443862 | 11.535034 | 27.7766427 | -0.443447 |
| 54 | N | 0.14461 | 11.5540402 | 7.8905376 | -0.438639 |
| 55 | C | 0.1395758 | 12.064659 | 11.7352782 | 0.587952 |
| 56 | N | 0.1444663 | 10.3126776 | 12.5143799 | -0.474781 |
| 57 | O | 0.1214289 | 12.6248798 | 18.6902917 | -0.364153 |
| 58 | O | 0.1212726 | 12.6477502 | 35.0362942 | -0.357867 |
| 59 | C | 0.1441736 | 12.3705945 | 19.7684201 | 0.130154 |
| 60 | C | 0.144024 | 12.4095417 | 17.7468968 | 0.127870 |
| 61 | C | 1.0088696 | 9.4961246 | 31.2819627 | 0.183495 |
| 62 | C | 0.1559343 | 6.3690469 | 19.3190054 | 0.132674 |
| 63 | N | 0.1465802 | 10.2053173 | 22.758235 | -0.467913 |
| 64 | C | 0.1387749 | 11.17278 | 1.554633 | 0.569657 |
| 65 | N | 0.1466581 | 11.1487743 | 29.0496703 | -0.488429 |
| 66 | N | 0.1453182 | 11.3554797 | 8.9185681 | -0.447977 |
| 67 | C | 0.1387576 | 11.9736888 | 15.2257819 | 0.579423 |
| 68 | N | 0.1443112 | 10.3098047 | 22.6241108 | -0.435379 |
| 69 | O | 0.1219427 | 12.6401185 | 16.7481368 | -0.391069 |
| 70 | O | 0.1219024 | 12.6960607 | 34.1926051 | -0.389852 |
| 71 | C | 0.1465801 | 12.4599008 | 17.1674603 | 0.140641 |
| 72 | C | 0.1460855 | 12.3776768 | 17.2391038 | 0.130618 |
| 72 | C | 0.9244743 | 12.3308438 | 30.5397571 | 0.158527 |
| 73 | C | 0.1562827 | 4.2019956 | 18.4902718 | 0.131917 |
| 74 | N | 0.1456709 | 10.2933453 | 29.7648487 | -0.427322 |
| 75 | C | 0.1394833 | 11.2263436 | 34.8790224 | 0.573493 |
| 76 | N | 0.1438592 | 11.3526082 | 34.4494936 | -0.485512 |
| 77 | N | 0.1438615 | 11.1863062 | 3.6524915 | -0.474399 |
| 78 | C | 0.139178 | 12.2419439 | 10.2119112 | 0.590365 |
| 79 | N | 0.144277 | 10.3355609 | 13.2603159 | -0.450200 |
| 80 | O | 0.1213647 | 12.6881217 | 18.8958002 | -0.360250 |
| 81 | O | 0.1212127 | 12.6498784 | 35.491621 | -0.355860 |
| 82 | C | 0.1449862 | 12.3407646 | 19.2341414 | 0.065856 |
| 83 | C | 0.144275 | 12.5324675 | 16.9612523 | 0.074648 |
| 84 | C | 0.508808 | 14.7768242 | 30.2544379 | 0.144541 |
| 85 | C | 0.156666 | 1.7342739 | 17.9441628 | 0.157710 |
| 86 | N | 0.1452759 | 10.3105945 | 29.9708931 | -0.431670 |
| 87 | C | 0.1394927 | 11.2107401 | 34.8459282 | 0.589923 |
| 88 | N | 0.1442251 | 11.5371368 | 27.8665341 | -0.448842 |
| 89 | N | 0.1449553 | 11.5442194 | 7.9560053 | -0.431370 |
| 90 | C | 0.1396719 | 11.9715527 | 12.5229998 | 0.590517 |
| 91 | N | 0.14409 | 10.3364987 | 13.2194461 | -0.449929 |
| 92 | O | 0.1213431 | 12.6490505 | 19.0870603 | -0.360928 |
| 93 | O | 0.1212689 | 12.6424109 | 34.7917967 | -0.356846 |
| 94 | C | 0.1443862 | 12.4772272 | 16.9368823 | 0.081513 |
| 95 | C | 0.14461 | 12.4366949 | 19.2579961 | 0.061216 |
| 96 | H | 0.1100784 | 11.3259434 | 12.2710509 | 0.138181 |
| 97 | H | 0.1099008 | 11.3530389 | 24.4706249 | 0.145910 |
| 98 | H | 0.1097302 | 11.1916884 | 5.0232781 | 0.137749 |
| 99 | H | 0.1094675 | 10.6124485 | 16.844808 | 0.163385 |
| 100 | H | 0.1099072 | 10.7414489 | 32.6371897 | 0.118187 |
| 101 | H | 0.1091077 | 10.929617 | 20.7720601 | 0.161009 |
| 102 | H | 0.1092654 | 11.348826 | 22.5955574 | 0.169087 |
| 103 | H | 0.1092671 | 11.3468823 | 10.6447831 | 0.166352 |
| 104 | H | 0.1092617 | 10.7348251 | 22.3629649 | 0.160193 |
| 105 | H | 0.1097362 | 11.0065996 | 10.5353588 | 0.126969 |
| 106 | H | 0.109126 | 10.7668167 | 15.6595662 | 0.162278 |
| 107 | H | 0.1100847 | 11.0825347 | 27.514489 | 0.120378 |
| 108 | H | 0.1098868 | 11.3735562 | 12.9867207 | 0.152022 |
| 109 | H | 0.1100227 | 11.3363996 | 25.1813592 | 0.142777 |
| 110 | H | 0.1100937 | 10.9296541 | 4.1287993 | 0.123674 |
| 111 | H | 0.1092374 | 10.6527025 | 15.9953407 | 0.174453 |
| 112 | H | 0.1101087 | 10.8421527 | 31.6151786 | 0.120746 |
| 113 | H | 0.1092451 | 10.7118 | 19.7773092 | 0.172413 |
| 114 | H | 0.1101162 | 11.3262628 | 12.9078253 | 0.137885 |
| 115 | H | 0.1100884 | 11.3272117 | 25.120708 | 0.134928 |
| 116 | H | 0.1101592 | 10.9429835 | 4.0518208 | 0.116561 |
| 117 | H | 0.109244 | 10.657879 | 15.9105258 | 0.168039 |
| 118 | H | 0.1100482 | 10.8536217 | 31.5767656 | 0.121788 |
| 119 | H | 0.1092534 | 10.6859199 | 19.7241662 | 0.178625 |
| 120 | H | 0.1100784 | 11.3259434 | 12.2710509 | 0.138178 |
| 121 | H | 0.1099008 | 11.3530389 | 24.4706249 | 0.145911 |
| 123 | H | 0.1094675 | 10.6124485 | 16.844808 | 0.163384 |
| 124 | H | 0.1097302 | 11.1916884 | 5.0232781 | 0.137748 |
| 125 | H | 0.1091077 | 10.929617 | 20.7720601 | 0.161009 |
| 126 | H | 0.1099072 | 10.7414489 | 32.6371897 | 0.118186 |
| 127 | H | 0.1092654 | 11.348826 | 22.5955574 | 0.169087 |
| 128 | H | 0.1092671 | 11.3468823 | 10.6447831 | 0.166351 |
| 129 | H | 0.1097362 | 11.0065996 | 10.5353588 | 0.126969 |
| 130 | H | 0.1092617 | 10.7348251 | 22.3629649 | 0.160192 |
| 131 | H | 0.109126 | 10.7668167 | 15.6595662 | 0.162277 |
| 132 | H | 0.1100847 | 11.0825347 | 27.514489 | 0.120376 |
| 133 | H | 0.1098868 | 11.3735562 | 12.9867207 | 0.152019 |
| 134 | H | 0.1100227 | 11.3363996 | 25.1813592 | 0.142777 |
| 135 | H | 0.1092374 | 10.6527025 | 15.9953407 | 0.174451 |
| 136 | H | 0.1100937 | 10.9296541 | 4.1287993 | 0.123688 |
| 137 | H | 0.1101087 | 10.8421527 | 31.6151786 | 0.120746 |
| 138 | H | 0.1092451 | 10.7118 | 19.7773092 | 0.172411 |
| 139 | H | 0.1101162 | 11.3262628 | 12.9078253 | 0.137885 |
| 140 | H | 0.1100884 | 11.3272117 | 25.120708 | 0.134929 |
| 141 | H | 0.1101592 | 10.8580502 | 31.7005649 | 0.116563 |
| 142 | H | 0.109244 | 10.7053151 | 19.8605741 | 0.168041 |
| 143 | H | 0.1092534 | 10.6547833 | 16.0045193 | 0.178627 |
| 144 | H | 0.1100482 | 10.930423 | 4.1285448 | 0.121788 |

**Table S13. Coordinates of CB[9]**

| No | Atom | Coordinates | | | Atomic charge |
| --- | --- | --- | --- | --- | --- |
| X(nm) | Y(nm) | Z(nm) |
| 1 | C | 0.0000000 | 0.0000000 | 0.0000000 | 0.160691 |
| 2 | C | 0.1566990 | 0.0000000 | 0.0000000 | 0.158974 |
| 3 | N | 0.1444486 | 10.3489008 | 0.0000000 | -0.438238 |
| 4 | C | 0.1392476 | 11.2748683 | 35.7841521 | 0.589465 |
| 5 | N | 0.1447069 | 10.3559783 | 35.78564 | -0.437617 |
| 6 | N | 0.1444739 | 10.3603556 | 23.5638531 | -0.441749 |
| 7 | C | 0.1392811 | 11.2651543 | 35.7639122 | 0.588987 |
| 8 | N | 0.144767 | 10.3471001 | 12.007198 | -0.433078 |
| 9 | O | 0.121355 | 12.6316007 | 18.8478256 | -0.356995 |
| 10 | O | 0.1213381 | 12.6292459 | 18.8780188 | -0.356901 |
| 11 | C | 0.1444356 | 12.4149467 | 19.4644944 | 0.060120 |
| 12 | C | 0.1446138 | 12.3339931 | 16.3959982 | 0.060256 |
| 13 | C | 0.5040193 | 1.4163012 | 29.8585023 | 0.154280 |
| 14 | C | 0.1567329 | 15.3921531 | 18.0221531 | 0.151557 |
| 15 | N | 0.1445663 | 10.3518795 | 29.8770204 | -0.436919 |
| 16 | C | 0.1393092 | 11.2601829 | 35.6054068 | 0.589221 |
| 17 | N | 0.1445936 | 11.519428 | 28.2077459 | -0.433309 |
| 18 | N | 0.1444528 | 11.5081776 | 7.9712379 | -0.435497 |
| 19 | C | 0.1393105 | 12.087652 | 12.2198756 | 0.590756 |
| 20 | N | 0.1445786 | 10.350739 | 12.1816455 | -0.438071 |
| 21 | O | 0.1213402 | 12.6310745 | 18.9542813 | -0.356610 |
| 22 | O | 0.1213374 | 12.6335992 | 35.0575116 | -0.356557 |
| 23 | C | 0.1445536 | 12.3591171 | 19.5893927 | 0.060995 |
| 24 | C | 0.1444954 | 12.3526743 | 16.455904 | 0.070007 |
| 25 | C | 0.9473121 | 3.4240219 | 29.8501036 | 0.143181 |
| 26 | C | 0.156758 | 13.3213327 | 17.9890599 | 0.159056 |
| 27 | N | 0.144694 | 10.3541011 | 30.0549387 | -0.433261 |
| 28 | C | 0.1393487 | 11.2455061 | 35.4177826 | 0.589141 |
| 29 | N | 0.1444496 | 11.5197346 | 28.1037824 | -0.436548 |
| 30 | N | 0.1445728 | 11.5053496 | 7.9020945 | -0.433091 |
| 31 | C | 0.1393717 | 12.0440377 | 12.3462944 | 0.589460 |
| 32 | N | 0.1444482 | 10.3549726 | 12.4227162 | -0.438892 |
| 33 | O | 0.1213523 | 12.6328982 | 19.0167332 | -0.356782 |
| 34 | O | 0.1213426 | 12.6364257 | 34.9349858 | -0.356817 |
| 35 | C | 0.1446001 | 12.3349448 | 19.5912529 | 0.064633 |
| 36 | C | 0.144432 | 12.3769095 | 16.4473612 | 0.064505 |
| 37 | C | 1.2721158 | 5.4485018 | 29.834369 | 0.164706 |
| 38 | C | 0.1566458 | 11.3046938 | 18.0781966 | 0.160652 |
| 39 | N | 0.144741 | 10.3584382 | 30.1618498 | -0.438649 |
| 40 | C | 0.1394358 | 11.238561 | 35.4091011 | 0.588034 |
| 41 | N | 0.1444711 | 11.5137791 | 28.0802247 | -0.439895 |
| 42 | N | 0.144632 | 11.5131912 | 7.8896846 | -0.434159 |
| 43 | C | 0.1393744 | 12.0475544 | 12.4108282 | 0.586309 |
| 44 | N | 0.1444832 | 10.3606317 | 12.4267551 | -0.440545 |
| 45 | O | 0.1213317 | 12.6361098 | 19.0132787 | -0.357158 |
| 46 | O | 0.1213392 | 12.633826 | 34.9311807 | -0.357228 |
| 47 | C | 0.1445679 | 12.3222203 | 19.6488648 | 0.078688 |
| 48 | C | 0.1444883 | 12.3785387 | 16.4017232 | 0.073423 |
| 49 | C | 1.4435786 | 7.4601985 | 29.7842766 | 0.163785 |
| 50 | C | 0.1566004 | 9.4354121 | 18.2195019 | 0.168552 |
| 51 | N | 0.1445264 | 10.3582373 | 29.9527172 | -0.442438 |
| 52 | C | 0.1393179 | 11.2627131 | 35.7091111 | 0.584986 |
| 53 | N | 0.1445649 | 11.5030668 | 28.0690547 | -0.438063 |
| 54 | N | 0.1445668 | 11.5184015 | 7.8220734 | -0.439702 |
| 55 | C | 0.1393144 | 12.0883278 | 12.2550184 | 0.584251 |
| 56 | N | 0.1447082 | 10.3537109 | 12.0819615 | -0.439180 |
| 57 | O | 0.1213279 | 12.6317979 | 18.88678 | -0.357827 |
| 58 | O | 0.1213378 | 12.6314262 | 35.0244418 | -0.357563 |
| 59 | C | 0.1444412 | 12.3627378 | 19.6044984 | 0.082341 |
| 60 | C | 0.1446072 | 12.3374359 | 16.4281786 | 0.079042 |
| 61 | C | 1.4484438 | 9.4663675 | 29.7066711 | 0.156551 |
| 62 | C | 0.156625 | 7.4496915 | 18.258236 | 0.165223 |
| 63 | N | 0.1443837 | 10.3516481 | 29.5878125 | -0.445151 |
| 64 | C | 0.1392174 | 11.2792325 | 35.9125289 | 0.582951 |
| 65 | N | 0.1446397 | 11.5097627 | 28.0606648 | -0.433558 |
| 66 | N | 0.1444504 | 11.5242203 | 7.8573125 | -0.441272 |
| 67 | C | 0.1392486 | 12.1155534 | 11.9119297 | 0.584503 |
| 68 | N | 0.1448395 | 10.3490939 | 11.8453232 | -0.438424 |
| 69 | O | 0.1213381 | 12.6312416 | 18.8120569 | -0.357968 |
| 70 | O | 0.121333 | 12.6299741 | 35.1986351 | -0.358042 |
| 71 | C | 0.1444775 | 12.3891112 | 19.5244772 | 0.083926 |
| 72 | C | 0.144604 | 12.314716 | 16.4143649 | 0.089146 |
| 72 | C | 1.2770311 | 11.4740328 | 29.6400305 | 0.164921 |
| 73 | C | 0.1566659 | 5.3957616 | 18.0165353 | 0.168814 |
| 74 | N | 0.1448061 | 10.3518135 | 29.8522898 | -0.438671 |
| 75 | C | 0.1394265 | 11.2360672 | 35.283903 | 0.584172 |
| 76 | N | 0.1445142 | 11.5327829 | 28.1628494 | -0.445226 |
| 77 | N | 0.1445693 | 11.504627 | 7.9848016 | -0.438140 |
| 78 | C | 0.1394101 | 12.0358043 | 12.4501629 | 0.584689 |
| 79 | N | 0.1443888 | 10.3550363 | 12.5692069 | -0.446401 |
| 80 | O | 0.1213337 | 12.638817 | 19.0771549 | -0.357647 |
| 81 | O | 0.1213369 | 12.6351455 | 34.8874093 | -0.357903 |
| 82 | C | 0.1446312 | 12.3077953 | 19.5847971 | 0.086049 |
| 83 | C | 0.1444542 | 12.394469 | 16.4456661 | 0.087194 |
| 84 | C | 0.9477484 | 13.473667 | 29.6345403 | 0.165806 |
| 85 | C | 0.1566608 | 3.3752032 | 17.9504153 | 0.157715 |
| 86 | N | 0.1446384 | 10.3511613 | 29.8897463 | -0.434359 |
| 87 | C | 0.1393455 | 11.2573937 | 35.5082154 | 0.584611 |
| 88 | N | 0.144433 | 11.5105118 | 28.0608785 | -0.443379 |
| 89 | N | 0.1446025 | 11.5244305 | 7.8688251 | -0.440748 |
| 90 | C | 0.1393878 | 12.0633127 | 12.3791882 | 0.583504 |
| 91 | N | 0.1445626 | 10.3557268 | 12.3420523 | -0.436976 |
| 92 | O | 0.1213299 | 12.6330489 | 18.9502573 | -0.358206 |
| 93 | O | 0.1213313 | 12.6352122 | 34.9679053 | -0.357480 |
| 94 | C | 0.1445374 | 12.3514962 | 19.5419494 | 0.076941 |
| 95 | C | 0.1445856 | 12.3483783 | 16.3851705 | 0.072329 |
| 96 | C | 0.5034876 | 15.4622923 | 29.6608659 | 0.168521 |
| 97 | C | 0.1566169 | 1.3589135 | 18.0296969 | 0.151165 |
| 98 | N | 0.1445037 | 10.3551965 | 29.9114059 | -0.437581 |
| 99 | C | 0.1393225 | 11.2641374 | 35.6941296 | 0.586451 |
| 100 | N | 0.1445611 | 11.5104517 | 28.1300728 | -0.437418 |
| 101 | N | 0.1444822 | 11.5185198 | 7.9163996 | -0.441759 |
| 102 | C | 0.1392693 | 12.0890475 | 12.13951 | 0.586131 |
| 103 | N | 0.144682 | 10.3518138 | 12.0987417 | -0.433852 |
| 104 | O | 0.1213297 | 12.6292831 | 18.9048541 | -0.357339 |
| 105 | O | 0.1213445 | 12.6335093 | 35.1241191 | -0.357508 |
| 106 | C | 0.1445956 | 12.3292786 | 16.3787645 | 0.071407 |
| 107 | C | 0.1444786 | 12.3589114 | 19.6495844 | 0.069091 |
| 108 | H | 0.1102279 | 11.3169911 | 11.6760023 | 0.128604 |
| 109 | H | 0.1102209 | 11.312064 | 23.8852491 | 0.128809 |
| 110 | H | 0.1092382 | 10.6883417 | 16.3397896 | 0.171072 |
| 111 | H | 0.1102998 | 10.8972012 | 4.4906393 | 0.121750 |
| 112 | H | 0.1103236 | 10.8909278 | 31.7085376 | 0.121440 |
| 113 | H | 0.1092359 | 10.6962986 | 19.8481123 | 0.169616 |
| 114 | H | 0.1102246 | 11.3109878 | 11.8409183 | 0.131792 |
| 115 | H | 0.1102169 | 11.3130166 | 24.0742365 | 0.131436 |
| 116 | H | 0.1102834 | 10.8994624 | 4.3885757 | 0.121024 |
| 117 | H | 0.1092419 | 10.6955336 | 16.2397062 | 0.172514 |
| 118 | H | 0.1092333 | 10.7048221 | 19.7717133 | 0.169555 |
| 119 | H | 0.1103254 | 10.8950371 | 31.6337766 | 0.117753 |
| 120 | H | 0.1102115 | 11.311882 | 12.0937544 | 0.133011 |
| 121 | H | 0.1102038 | 11.3140018 | 24.311783 | 0.130184 |
| 123 | H | 0.1092399 | 10.6929673 | 16.1973637 | 0.169678 |
| 124 | H | 0.1102992 | 10.9049315 | 4.3393288 | 0.120240 |
| 125 | H | 0.109247 | 10.7058495 | 19.7683011 | 0.170470 |
| 126 | H | 0.1102986 | 10.8872725 | 31.6238153 | 0.119836 |
| 127 | H | 0.1102201 | 11.3120806 | 12.0965924 | 0.125747 |
| 128 | H | 0.1102215 | 11.3107157 | 24.3211965 | 0.128106 |
| 129 | H | 0.10924 | 10.7034062 | 16.1898506 | 0.166686 |
| 130 | H | 0.1103491 | 10.8938584 | 4.3194331 | 0.115755 |
| 131 | H | 0.109234 | 10.7006513 | 19.7026136 | 0.169047 |
| 132 | H | 0.1102823 | 10.8855551 | 31.5730051 | 0.118673 |
| 133 | H | 0.1102216 | 11.3201703 | 11.7512526 | 0.124239 |
| 134 | H | 0.1102435 | 11.3088268 | 23.974043 | 0.122973 |
| 135 | H | 0.1103264 | 10.8782268 | 4.3270839 | 0.114667 |
| 136 | H | 0.1092468 | 10.7138941 | 16.1880171 | 0.166860 |
| 137 | H | 0.1102795 | 10.8956789 | 31.6050402 | 0.116751 |
| 138 | H | 0.1092463 | 10.6915992 | 19.7408957 | 0.167804 |
| 139 | H | 0.1102122 | 11.3201521 | 11.5069058 | 0.127559 |
| 140 | H | 0.1102291 | 11.3164674 | 23.7326946 | 0.126024 |
| 141 | H | 0.1102296 | 10.8718959 | 4.4021605 | 0.117929 |
| 142 | H | 0.1092433 | 10.7046097 | 16.2650736 | 0.166852 |
| 143 | H | 0.1103483 | 10.8953455 | 31.7124926 | 0.111738 |
| 144 | H | 0.109238 | 10.7051577 | 19.8640202 | 0.165085 |
| 145 | H | 0.1102204 | 11.3131905 | 12.2286763 | 0.124061 |
| 146 | H | 0.1102203 | 11.31617 | 24.4606909 | 0.122881 |
| 147 | H | 0.1103208 | 10.8999622 | 4.314026 | 0.114544 |
| 148 | H | 0.1092457 | 10.6944519 | 16.1749308 | 0.165847 |
| 149 | H | 0.1092447 | 10.7051288 | 19.7468104 | 0.165543 |
| 150 | H | 0.1102793 | 10.8753189 | 31.6054901 | 0.115444 |
| 151 | H | 0.1102289 | 11.304227 | 12.0040944 | 0.125779 |
| 152 | H | 0.1102106 | 11.3112919 | 24.2206668 | 0.126590 |
| 153 | H | 0.1103277 | 10.8996418 | 4.395439 | 0.115085 |
| 154 | H | 0.1092457 | 10.7004517 | 16.2552411 | 0.168269 |
| 155 | H | 0.110275 | 10.8807075 | 31.6671 | 0.118315 |
| 156 | H | 0.1092401 | 10.7058271 | 19.7978052 | 0.169596 |
| 157 | H | 0.1102169 | 11.3061628 | 11.7557921 | 0.124688 |
| 158 | H | 0.1102222 | 11.3109987 | 23.9876957 | 0.128695 |
| 159 | H | 0.109238 | 10.6929635 | 19.7435192 | 0.168729 |
| 160 | H | 0.1103332 | 10.9028231 | 31.6019725 | 0.118234 |
| 161 | H | 0.1103087 | 10.8822068 | 4.3817074 | 0.118991 |
| 162 | H | 0.1092478 | 10.7086211 | 16.2421198 | 0.169912 |

**Table S14. Coordinates of i-CB[9**]

| No | Atom | Coordinates | | | Atomic charge |
| --- | --- | --- | --- | --- | --- |
| X(nm) | Y(nm) | Z(nm) |
| 1 | C | 0.0000000 | 0.0000000 | 0.0000000 | 0.155335 |
| 2 | C | 0.15659 | 0.0000000 | 0.0000000 | 0.163629 |
| 3 | N | 0.144325 | 10.35462 | 0.0000000 | -0.439956 |
| 4 | C | 0.13919 | 11.27974 | 35.99177 | 0.586412 |
| 5 | N | 0.144863 | 10.34501 | 35.55159 | -0.432059 |
| 6 | N | 0.144342 | 10.36219 | 23.34002 | -0.445507 |
| 7 | C | 0.139292 | 11.27043 | 35.96804 | 0.589009 |
| 8 | N | 0.144927 | 10.34354 | 11.77674 | -0.435609 |
| 9 | O | 0.121358 | 12.633 | 18.7545 | -0.357108 |
| 10 | O | 0.121327 | 12.626 | 18.76676 | -0.357310 |
| 11 | C | 0.144458 | 12.42538 | 19.47755 | 0.063576 |
| 12 | C | 0.144663 | 12.29695 | 16.38694 | 0.070326 |
| 13 | C | 0.503977 | 1.407513 | 29.85017 | 0.162770 |
| 14 | C | 0.156689 | 15.3896 | 18.00722 | 0.145429 |
| 15 | N | 0.14477 | 10.34429 | 30.19419 | -0.429693 |
| 16 | C | 0.139348 | 11.24593 | 35.32307 | 0.587171 |
| 17 | N | 0.144516 | 11.53297 | 28.24207 | -0.442300 |
| 18 | N | 0.144513 | 11.49688 | 8.023336 | -0.432925 |
| 19 | C | 0.139397 | 12.05321 | 12.43598 | 0.589170 |
| 20 | N | 0.1444 | 10.35541 | 12.51093 | -0.441064 |
| 21 | O | 0.121338 | 12.63829 | 19.06685 | -0.357374 |
| 22 | O | 0.121327 | 12.63652 | 34.83578 | -0.356158 |
| 23 | C | 0.144733 | 12.32547 | 19.56297 | 0.063788 |
| 24 | C | 0.14433 | 12.39192 | 16.48367 | 0.069381 |
| 25 | C | 0.946826 | 3.425495 | 29.76915 | 0.147771 |
| 26 | C | 0.156498 | 13.27492 | 18.13734 | 0.161634 |
| 27 | N | 0.145125 | 10.32872 | 30.80548 | -0.430431 |
| 28 | C | 0.139544 | 11.20133 | 34.89448 | 0.588710 |
| 29 | N | 0.144296 | 11.53392 | 28.11065 | -0.441886 |
| 30 | N | 0.14481 | 11.50825 | 7.943649 | -0.430204 |
| 31 | C | 0.139612 | 11.96263 | 12.88463 | 0.588453 |
| 32 | N | 0.144151 | 10.35215 | 13.07566 | -0.443926 |
| 33 | O | 0.121334 | 12.64523 | 19.17064 | -0.356158 |
| 34 | O | 0.121322 | 12.64356 | 34.63579 | -0.357375 |
| 35 | C | 0.144736 | 12.27438 | 19.52122 | 0.068830 |
| 36 | C | 0.14435 | 12.41605 | 16.35413 | 0.062959 |
| 37 | C | 1.270021 | 5.44921 | 29.594 | 0.163843 |
| 38 | C | 0.156671 | 11.37253 | 18.63051 | 0.152910 |
| 39 | N | 0.144717 | 10.35433 | 30.68182 | -0.440791 |
| 40 | C | 0.139482 | 11.24023 | 35.41839 | 0.589646 |
| 41 | N | 0.144501 | 11.50081 | 28.14356 | -0.440895 |
| 42 | N | 0.14466 | 11.52557 | 7.909609 | -0.434900 |
| 43 | C | 0.139294 | 12.0606 | 12.52759 | 0.586104 |
| 44 | N | 0.144472 | 10.35574 | 12.41313 | -0.434816 |
| 45 | O | 0.121326 | 12.63183 | 18.99519 | -0.357266 |
| 46 | O | 0.12135 | 12.63823 | 34.98722 | -0.357153 |
| 47 | C | 0.144461 | 12.32229 | 19.66309 | 0.081411 |
| 48 | C | 0.144527 | 12.3757 | 16.44575 | 0.057070 |
| 49 | C | 1.445944 | 7.441928 | 29.30712 | 0.156252 |
| 50 | C | 0.156508 | 9.364854 | 19.00937 | 0.168340 |
| 51 | N | 0.144116 | 10.35424 | 29.60616 | -0.448843 |
| 52 | C | 0.139224 | 11.27463 | 0.416309 | 0.584742 |
| 53 | N | 0.144778 | 11.49805 | 27.97488 | -0.432901 |
| 54 | N | 0.144413 | 11.54065 | 7.757785 | -0.441474 |
| 55 | C | 0.139148 | 12.16641 | 11.36515 | 0.582781 |
| 56 | N | 0.145189 | 10.31838 | 11.28872 | -0.432780 |
| 57 | O | 0.121339 | 12.61906 | 18.54226 | -0.358539 |
| 58 | O | 0.121344 | 12.63041 | 35.51539 | -0.356912 |
| 59 | C | 0.144332 | 12.43594 | 19.75037 | 0.083755 |
| 60 | C | 0.144809 | 12.28491 | 16.51545 | 0.080489 |
| 61 | C | 1.44722 | 9.420451 | 28.99917 | 0.154076 |
| 62 | C | 0.156167 | 7.482662 | 18.73312 | 0.161616 |
| 63 | N | 0.144249 | 10.37947 | 29.05798 | -0.485414 |
| 64 | C | 0.139248 | 11.28568 | 0.010553 | 0.571771 |
| 65 | N | 0.144694 | 11.52179 | 28.06521 | -0.434280 |
| 66 | N | 0.144484 | 11.49816 | 7.71584 | -0.444463 |
| 67 | C | 0.139444 | 12.10663 | 11.84326 | 0.578171 |
| 68 | N | 0.144786 | 10.34618 | 11.72681 | -0.475879 |
| 69 | O | 0.121321 | 12.62323 | 18.61706 | -0.356098 |
| 70 | O | 0.121245 | 12.65694 | 34.95559 | -0.354870 |
| 71 | C | 0.143822 | 12.26487 | 19.3245 | 0.156776 |
| 72 | C | 0.143711 | 12.23121 | 16.94822 | 0.146042 |
| 72 | C | 1.148548 | 10.96415 | 29.01039 | 0.159092 |
| 73 | C | 0.156501 | 4.926979 | 17.60523 | 0.179728 |
| 74 | N | 0.144324 | 10.28599 | 24.09542 | -0.481069 |
| 75 | C | 0.138223 | 11.20992 | 34.34357 | 0.587121 |
| 76 | N | 0.1464 | 11.34266 | 27.34718 | -0.479744 |
| 77 | N | 0.146386 | 11.25205 | 9.009036 | -0.466706 |
| 78 | C | 0.138747 | 11.83671 | 17.56169 | 0.590724 |
| 79 | N | 0.14624 | 10.17108 | 25.80256 | -0.483224 |
| 80 | O | 0.122088 | 12.58978 | 18.6349 | -0.396493 |
| 81 | O | 0.122061 | 12.58953 | 34.8188 | -0.396089 |
| 82 | C | 0.14646 | 12.69843 | 17.8153 | 0.159404 |
| 83 | C | 0.145734 | 12.61531 | 17.88619 | 0.156926 |
| 84 | C | 0.947829 | 13.45983 | 29.22653 | 0.158943 |
| 85 | C | 0.156321 | 3.358584 | 17.72767 | 0.155394 |
| 86 | N | 0.144676 | 10.34559 | 30.01816 | -0.441725 |
| 87 | C | 0.139269 | 11.29023 | 35.86788 | 0.576319 |
| 88 | N | 0.143647 | 11.24698 | 34.10359 | -0.480174 |
| 89 | N | 0.144021 | 11.34837 | 2.358674 | -0.480863 |
| 90 | C | 0.139209 | 12.29892 | 10.65577 | 0.572636 |
| 91 | N | 0.144962 | 10.34252 | 11.96948 | -0.436445 |
| 92 | O | 0.121278 | 12.66154 | 18.68384 | -0.355704 |
| 93 | O | 0.121287 | 12.62937 | 35.40182 | -0.355197 |
| 94 | C | 0.144473 | 12.39107 | 19.55922 | 0.083470 |
| 95 | C | 0.144732 | 12.32763 | 16.4082 | 0.079885 |
| 96 | C | 0.503603 | 15.43198 | 29.39032 | 0.167314 |
| 97 | C | 0.156591 | 1.376723 | 18.09761 | 0.157565 |
| 98 | N | 0.144261 | 10.35816 | 29.96851 | -0.442787 |
| 99 | C | 0.139191 | 11.2769 | 0.101128 | 0.583644 |
| 100 | N | 0.144701 | 11.51161 | 28.13515 | -0.432671 |
| 101 | N | 0.144358 | 11.51751 | 7.840007 | -0.448816 |
| 102 | C | 0.139214 | 12.12197 | 11.78496 | 0.584655 |
| 103 | N | 0.144994 | 10.33797 | 11.64266 | -0.433129 |
| 104 | O | 0.121328 | 12.62945 | 18.70837 | -0.357010 |
| 105 | O | 0.121353 | 12.62315 | 35.26672 | -0.357985 |
| 106 | C | 0.144665 | 12.31498 | 16.44602 | 0.060712 |
| 107 | C | 0.144354 | 12.38528 | 19.68156 | 0.080200 |
| 108 | H | 0.110212 | 11.31745 | 11.4445 | 0.131073 |
| 109 | H | 0.110198 | 11.31154 | 23.65623 | 0.127594 |
| 110 | H | 0.109249 | 10.69105 | 16.36432 | 0.174415 |
| 111 | H | 0.110234 | 10.88854 | 4.509498 | 0.121057 |
| 112 | H | 0.110343 | 10.88523 | 31.7751 | 0.118062 |
| 113 | H | 0.109238 | 10.70829 | 19.90987 | 0.165686 |
| 114 | H | 0.110223 | 11.3134 | 12.18148 | 0.129553 |
| 115 | H | 0.11021 | 11.31375 | 24.41153 | 0.133145 |
| 116 | H | 0.11021 | 10.91126 | 4.354552 | 0.120676 |
| 117 | H | 0.109242 | 10.68086 | 16.21417 | 0.171919 |
| 118 | H | 0.109233 | 10.72022 | 19.81517 | 0.169971 |
| 119 | H | 0.110327 | 10.87307 | 31.67571 | 0.118988 |
| 120 | H | 0.110202 | 11.32503 | 12.77087 | 0.132490 |
| 121 | H | 0.110211 | 11.32603 | 24.96521 | 0.129800 |
| 123 | H | 0.10922 | 10.68832 | 16.24391 | 0.165673 |
| 124 | H | 0.110351 | 10.91429 | 4.382645 | 0.119809 |
| 125 | H | 0.10923 | 10.73098 | 19.79077 | 0.174351 |
| 126 | H | 0.110224 | 10.84162 | 31.65696 | 0.120390 |
| 127 | H | 0.110221 | 11.32139 | 12.09084 | 0.128149 |
| 128 | H | 0.110214 | 11.3144 | 24.31055 | 0.131564 |
| 129 | H | 0.109239 | 10.71258 | 16.11597 | 0.165738 |
| 130 | H | 0.110393 | 10.89319 | 4.272602 | 0.115802 |
| 131 | H | 0.109244 | 10.67919 | 19.64692 | 0.175107 |
| 132 | H | 0.11018 | 10.90279 | 31.50398 | 0.123735 |
| 133 | H | 0.110183 | 11.30155 | 10.97048 | 0.128504 |
| 134 | H | 0.11019 | 11.31791 | 23.18135 | 0.125424 |
| 135 | H | 0.110235 | 10.85519 | 4.337041 | 0.119306 |
| 136 | H | 0.109222 | 10.72983 | 16.19447 | 0.166782 |
| 137 | H | 0.110334 | 10.93886 | 31.46608 | 0.118352 |
| 138 | H | 0.109219 | 10.67234 | 19.60991 | 0.167377 |
| 139 | H | 0.110135 | 11.32908 | 11.48303 | 0.132807 |
| 140 | H | 0.109999 | 11.3717 | 23.65491 | 0.143017 |
| 141 | H | 0.109909 | 10.80668 | 3.525419 | 0.120311 |
| 142 | H | 0.109266 | 10.90972 | 15.32534 | 0.157036 |
| 143 | H | 0.110129 | 10.88133 | 32.75753 | 0.118577 |
| 144 | H | 0.109133 | 10.88415 | 20.95788 | 0.158542 |
| 145 | H | 0.109309 | 11.32523 | 26.01892 | 0.167308 |
| 146 | H | 0.109309 | 11.34214 | 13.89269 | 0.164580 |
| 147 | H | 0.110062 | 10.98178 | 10.28348 | 0.120403 |
| 148 | H | 0.109192 | 10.84585 | 22.11715 | 0.155881 |
| 149 | H | 0.109251 | 10.74276 | 14.43665 | 0.157654 |
| 150 | H | 0.109998 | 11.00564 | 26.25636 | 0.119276 |
| 151 | H | 0.110004 | 11.3607 | 11.67042 | 0.142987 |
| 152 | H | 0.110144 | 11.31507 | 23.85718 | 0.132852 |
| 153 | H | 0.110312 | 10.87929 | 4.426549 | 0.116508 |
| 154 | H | 0.109241 | 10.71498 | 16.26867 | 0.166946 |
| 155 | H | 0.110231 | 10.89581 | 31.58893 | 0.120735 |
| 156 | H | 0.10924 | 10.69203 | 19.72609 | 0.168016 |
| 157 | H | 0.110186 | 11.3072 | 11.31028 | 0.126030 |
| 158 | H | 0.110198 | 11.31157 | 23.52765 | 0.128218 |
| 159 | H | 0.109231 | 10.67908 | 19.69039 | 0.173036 |
| 160 | H | 0.110285 | 10.91861 | 31.55377 | 0.122268 |
| 161 | H | 0.110314 | 10.87779 | 4.327885 | 0.116985 |
| 162 | H | 0.109245 | 10.72125 | 16.18808 | 0.166805 |

**Table S15. Coordinates of i(1,5)-CB[9**]

| No | Atom | Coordinates | | | Atomic charge |
| --- | --- | --- | --- | --- | --- |
| X(nm) | Y(nm) | Z(nm) |
| 1 | C | 0.0000000 | 0.0000000 | 0.0000000 | 0.155335 |
| 2 | C | 0.1563509 | 0.0000000 | 0.0000000 | 0.151822 |
| 3 | N | 0.1439416 | 10.3343507 | 0.0000000 | -0.446434 |
| 4 | C | 0.139126 | 11.2748888 | 0.8502446 | 0.589545 |
| 5 | N | 0.1453944 | 10.2852266 | 34.6603306 | -0.429642 |
| 6 | N | 0.1439616 | 10.3322476 | 22.4625994 | -0.450649 |
| 7 | C | 0.1390894 | 11.2770252 | 0.8708653 | 0.589386 |
| 8 | N | 0.1454496 | 10.2894417 | 10.8641219 | -0.428288 |
| 9 | O | 0.1213091 | 12.6309032 | 18.3056101 | -0.356729 |
| 10 | O | 0.1213152 | 12.6227209 | 18.2592302 | -0.357045 |
| 11 | C | 0.1444642 | 12.5260062 | 19.1695486 | 0.065249 |
| 12 | C | 0.1447859 | 12.2918221 | 16.7195755 | 0.083183 |
| 13 | C | 0.5072199 | 1.670758 | 29.883801 | 0.151742 |
| 14 | C | 0.1568257 | 14.9209118 | 18.0724022 | 0.173698 |
| 15 | N | 0.1446387 | 10.3173051 | 29.9242661 | -0.473110 |
| 16 | C | 0.1388357 | 11.3232157 | 35.687683 | 0.590967 |
| 17 | N | 0.1445102 | 11.5723508 | 28.1345242 | -0.443625 |
| 18 | N | 0.1444616 | 11.5148981 | 8.145043 | -0.443929 |
| 19 | C | 0.1389807 | 12.1068863 | 11.5061254 | 0.584314 |
| 20 | N | 0.1449583 | 10.3658753 | 12.1607196 | -0.480464 |
| 21 | O | 0.121312 | 12.642746 | 18.7009482 | -0.359093 |
| 22 | O | 0.1214655 | 12.6380903 | 35.164001 | -0.362868 |
| 23 | C | 0.1438972 | 12.3900394 | 18.6422717 | 0.122974 |
| 24 | C | 0.1443549 | 12.3516457 | 16.0651886 | 0.112858 |
| 25 | C | 0.8485698 | 4.5534407 | 29.6759207 | 0.178197 |
| 26 | C | 0.155981 | 15.275837 | 17.8851386 | 0.141484 |
| 27 | N | 0.1442876 | 10.2848576 | 27.9882408 | -0.450636 |
| 28 | C | 0.1390098 | 11.1133029 | 33.8409054 | 0.580477 |
| 29 | N | 0.1454779 | 11.3710354 | 27.0802491 | -0.443022 |
| 30 | N | 0.1462463 | 11.1317962 | 6.2945252 | -0.485859 |
| 31 | C | 0.1394082 | 11.9102843 | 19.1417694 | 0.565154 |
| 32 | N | 0.1468778 | 10.1439037 | 25.5698447 | -0.477305 |
| 33 | O | 0.1219447 | 12.5396308 | 19.7794562 | -0.388506 |
| 34 | O | 0.1219256 | 12.5901647 | 2.2954816 | -0.386474 |
| 35 | C | 0.1463154 | 12.5162411 | 18.4838825 | 0.154724 |
| 36 | C | 0.1463333 | 12.5337773 | 18.4081839 | 0.157371 |
| 37 | C | 1.3158971 | 5.4253855 | 29.7775691 | 0.161433 |
| 38 | C | 0.1562812 | 11.8040672 | 21.0033241 | 0.149338 |
| 39 | N | 0.1443402 | 10.3425163 | 30.1456692 | -0.453763 |
| 40 | C | 0.1393236 | 11.2935099 | 0.5398988 | 0.581431 |
| 41 | N | 0.1438322 | 11.2140235 | 33.0089843 | -0.480557 |
| 42 | N | 0.1437968 | 11.3679287 | 1.8523893 | -0.487011 |
| 43 | C | 0.1391053 | 12.3257502 | 9.6511803 | 0.567790 |
| 44 | N | 0.145374 | 10.3093132 | 11.2871987 | -0.431139 |
| 45 | O | 0.1212494 | 12.657443 | 18.2972575 | -0.354798 |
| 46 | O | 0.1213425 | 12.6146944 | 35.9618023 | -0.354959 |
| 47 | C | 0.1442481 | 12.4833303 | 19.4258252 | 0.100570 |
| 48 | C | 0.1448955 | 12.3218196 | 16.6429042 | 0.079606 |
| 49 | C | 1.5095788 | 7.1108523 | 28.7698854 | 0.157537 |
| 50 | C | 0.1564104 | 9.3353133 | 20.7104886 | 0.157985 |
| 51 | N | 0.1440765 | 10.3487652 | 29.0496953 | -0.451063 |
| 52 | C | 0.1391417 | 11.2790573 | 0.5963186 | 0.581530 |
| 53 | N | 0.14496 | 11.5237602 | 28.0228795 | -0.433975 |
| 54 | N | 0.1442686 | 11.5383202 | 7.8667465 | -0.451057 |
| 55 | C | 0.1391937 | 12.1834168 | 10.9676093 | 0.582205 |
| 56 | N | 0.1453183 | 10.3125999 | 11.1270263 | -0.434731 |
| 57 | O | 0.1213372 | 12.6224824 | 18.407541 | -0.356743 |
| 58 | O | 0.121324 | 12.6218332 | 35.5899958 | -0.357226 |
| 59 | C | 0.1442543 | 12.4864166 | 19.460154 | 0.077558 |
| 60 | C | 0.1449677 | 12.2650595 | 16.5528042 | 0.100384 |
| 61 | C | 1.4933901 | 8.8841408 | 27.9740088 | 0.148093 |
| 62 | C | 0.1562792 | 6.9644878 | 19.9156822 | 0.160746 |
| 63 | N | 0.1442578 | 10.3565264 | 28.2388986 | -0.486504 |
| 64 | C | 0.1390717 | 11.3029318 | 0.4479214 | 0.567504 |
| 65 | N | 0.1448165 | 11.5288875 | 28.0630573 | -0.430098 |
| 66 | N | 0.1442926 | 11.5208759 | 7.9619124 | -0.452123 |
| 67 | C | 0.1393428 | 12.1731472 | 11.0221522 | 0.580859 |
| 68 | N | 0.145057 | 10.3183502 | 11.3641812 | -0.480487 |
| 69 | O | 0.1213467 | 12.6143218 | 18.2957013 | -0.354584 |
| 70 | O | 0.1212436 | 12.6620897 | 35.429413 | -0.354614 |
| 71 | C | 0.1438173 | 12.3786118 | 18.7645715 | 0.155327 |
| 72 | C | 0.1438104 | 12.2565081 | 17.2513269 | 0.154973 |
| 72 | C | 1.1569217 | 10.2001749 | 27.917132 | 0.143820 |
| 73 | C | 0.1559159 | 4.0174005 | 17.3597694 | 0.179168 |
| 74 | N | 0.1444571 | 10.4575164 | 21.9531163 | -0.486661 |
| 75 | C | 0.1393909 | 11.1493068 | 35.1039952 | 0.565585 |
| 76 | N | 0.1463093 | 11.3579845 | 27.3000988 | -0.476301 |
| 77 | N | 0.146311 | 11.2105592 | 9.2313916 | -0.450683 |
| 78 | C | 0.1390005 | 11.8573018 | 17.7949795 | 0.580306 |
| 79 | N | 0.1468797 | 10.2618539 | 25.582053 | -0.445294 |
| 80 | O | 0.1219189 | 12.5972446 | 17.8606307 | -0.386677 |
| 81 | O | 0.1219387 | 12.5427038 | 35.3232072 | -0.388895 |
| 82 | C | 0.1463037 | 12.4184124 | 14.574558 | 0.115660 |
| 83 | C | 0.1454828 | 12.3448756 | 14.4629263 | 0.126676 |
| 84 | C | 0.9339542 | 12.6487477 | 28.1892421 | 0.170173 |
| 85 | C | 0.1569115 | 3.8756908 | 17.3989621 | 0.151384 |
| 86 | N | 0.1447513 | 10.33355 | 30.250734 | -0.442290 |
| 87 | C | 0.1389329 | 11.300427 | 35.8598474 | 0.582365 |
| 88 | N | 0.144359 | 11.1355 | 3.8168099 | -0.479701 |
| 89 | N | 0.1438489 | 11.3803401 | 5.6274233 | -0.472534 |
| 90 | C | 0.1387885 | 12.2187525 | 9.8939841 | 0.589038 |
| 91 | N | 0.1446783 | 10.3565023 | 12.0199059 | -0.442151 |
| 92 | O | 0.1214586 | 12.6331732 | 18.608497 | -0.362070 |
| 93 | O | 0.1213266 | 12.6432603 | 35.9093644 | -0.358548 |
| 94 | C | 0.1445347 | 12.413094 | 19.4216391 | 0.082232 |
| 95 | C | 0.144533 | 12.4385671 | 16.748553 | 0.064591 |
| 96 | C | 0.5066718 | 14.9287395 | 28.5249964 | 0.152650 |
| 97 | C | 0.1565456 | 1.6263768 | 18.1335318 | 0.146726 |
| 98 | N | 0.1440621 | 10.3440158 | 29.9897672 | -0.449433 |
| 99 | C | 0.139095 | 11.2841258 | 0.6412173 | 0.589035 |
| 100 | N | 0.1447008 | 11.5188105 | 27.8568154 | -0.427830 |
| 101 | N | 0.1444711 | 11.5587027 | 7.8210227 | -0.448295 |
| 102 | C | 0.1391657 | 12.1746785 | 10.8633373 | 0.589866 |
| 103 | N | 0.145236 | 10.3014018 | 11.1057171 | -0.428007 |
| 104 | O | 0.1213298 | 12.6312626 | 18.3812276 | -0.357465 |
| 105 | O | 0.1213178 | 12.6257405 | 35.733924 | -0.356855 |
| 106 | C | 0.144895 | 12.3056992 | 16.7881799 | 0.073536 |
| 107 | C | 0.1442641 | 12.5213508 | 19.2834305 | 0.070291 |
| 108 | H | 0.1101312 | 11.3303211 | 10.5524293 | 0.135805 |
| 109 | H | 0.110129 | 11.3301922 | 22.7485066 | 0.133811 |
| 110 | H | 0.1092432 | 10.6913056 | 16.2914077 | 0.175839 |
| 111 | H | 0.1100292 | 10.8418591 | 4.4573091 | 0.120127 |
| 112 | H | 0.1102713 | 10.9411704 | 31.887321 | 0.112177 |
| 113 | H | 0.1092647 | 10.6687829 | 20.0298661 | 0.168202 |
| 114 | H | 0.110096 | 11.3172333 | 11.9932046 | 0.135815 |
| 115 | H | 0.1099111 | 11.3554265 | 24.1002733 | 0.143077 |
| 116 | H | 0.1099405 | 10.7786936 | 3.3802443 | 0.118803 |
| 117 | H | 0.1091032 | 10.8896877 | 15.2512425 | 0.161094 |
| 118 | H | 0.1095662 | 10.5942328 | 18.5627961 | 0.163938 |
| 119 | H | 0.1096974 | 11.2435371 | 30.395536 | 0.144180 |
| 120 | H | 0.1092726 | 11.3659929 | 25.7200746 | 0.169167 |
| 121 | H | 0.1092927 | 11.3818984 | 13.6743146 | 0.166268 |
| 123 | H | 0.1091398 | 10.7985042 | 21.0238863 | 0.155417 |
| 124 | H | 0.1100917 | 11.0490648 | 9.1909082 | 0.117219 |
| 125 | H | 0.1092771 | 10.7270974 | 13.9385942 | 0.157043 |
| 126 | H | 0.1098112 | 10.9996033 | 25.761352 | 0.123694 |
| 127 | H | 0.109928 | 11.3680494 | 11.0306267 | 0.146493 |
| 128 | H | 0.1100692 | 11.3273259 | 23.1854226 | 0.136149 |
| 129 | H | 0.1092253 | 10.7258179 | 16.1808777 | 0.164742 |
| 130 | H | 0.1102073 | 10.8523664 | 4.3325578 | 0.113471 |
| 131 | H | 0.1092343 | 10.6620702 | 19.7607779 | 0.170177 |
| 132 | H | 0.110159 | 10.9231534 | 31.6258214 | 0.120726 |
| 133 | H | 0.1101377 | 11.3246047 | 10.8311182 | 0.131871 |
| 134 | H | 0.1101434 | 11.3387055 | 23.0216638 | 0.130790 |
| 135 | H | 0.1101666 | 10.8573382 | 4.3578375 | 0.120652 |
| 136 | H | 0.1092393 | 10.7195231 | 16.209997 | 0.171512 |
| 137 | H | 0.110208 | 10.9228031 | 31.7246208 | 0.113670 |
| 138 | H | 0.1092356 | 10.6673392 | 19.8608144 | 0.164726 |
| 139 | H | 0.110053 | 11.3359058 | 11.112724 | 0.136436 |
| 140 | H | 0.1099271 | 11.3591661 | 23.2819412 | 0.146643 |
| 141 | H | 0.1098242 | 10.7856531 | 3.5197417 | 0.124400 |
| 142 | H | 0.1092591 | 10.9241466 | 15.3361645 | 0.157373 |
| 143 | H | 0.110076 | 10.8872547 | 32.9751517 | 0.116784 |
| 144 | H | 0.1091493 | 10.8961879 | 21.1772453 | 0.155416 |
| 145 | H | 0.1092727 | 11.3937112 | 25.5797642 | 0.164943 |
| 146 | H | 0.1092739 | 11.3655037 | 13.6286323 | 0.168949 |
| 147 | H | 0.1097162 | 10.6256045 | 16.0875176 | 0.143713 |
| 148 | H | 0.1095492 | 11.2454764 | 27.9424338 | 0.163071 |
| 149 | H | 0.1091099 | 10.6203369 | 17.6122564 | 0.160291 |
| 150 | H | 0.109926 | 11.0613616 | 29.4784536 | 0.117922 |
| 151 | H | 0.1099169 | 11.3485378 | 11.7663709 | 0.144115 |
| 152 | H | 0.1100951 | 11.3219213 | 23.9459026 | 0.136112 |
| 153 | H | 0.1102667 | 10.8492369 | 4.1515132 | 0.112167 |
| 154 | H | 0.1092222 | 10.7229165 | 16.0015832 | 0.168960 |
| 155 | H | 0.1100952 | 10.9300342 | 31.5414098 | 0.120239 |
| 156 | H | 0.1092387 | 10.6523774 | 19.6815665 | 0.176171 |
| 157 | H | 0.110151 | 11.3222385 | 10.7771961 | 0.133685 |
| 158 | H | 0.1101535 | 11.3141131 | 23.0049073 | 0.135677 |
| 159 | H | 0.1092469 | 10.6415418 | 19.860259 | 0.170313 |
| 160 | H | 0.110197 | 10.9607223 | 31.7201808 | 0.118609 |
| 161 | H | 0.1101477 | 10.8195888 | 4.281071 | 0.119680 |
| 162 | H | 0.1092295 | 10.7379065 | 16.1220877 | 0.170973 |

**Table S16. Coordinates of CB[10**]

| No | Atom | Coordinates | | | Atomic charge |
| --- | --- | --- | --- | --- | --- |
| X(nm) | Y(nm) | Z(nm) |
| 1 | C | 0.0000000 | 0.0000000 | 0.0000000 | 0.141697 |
| 2 | C | 0.1565162 | 0.0000000 | 0.0000000 | 0.164376 |
| 3 | N | 0.1450088 | 10.3412911 | 0.0000000 | 0.426588 |
| 4 | C | 0.1396066 | 11.2050358 | 35.0535587 | 0.584498 |
| 5 | N | 0.1442447 | 10.3642182 | 0.6111264 | 0.438320 |
| 6 | N | 0.1450291 | 10.3432269 | 24.3972925 | 0.422416 |
| 7 | C | 0.1395016 | 11.2080161 | 35.0535362 | 0.585100 |
| 8 | N | 0.1442393 | 10.3532266 | 12.8342403 | 0.444650 |
| 9 | O | 0.1213284 | 12.6338815 | 19.1797405 | 0.359501 |
| 10 | O | 0.1213573 | 12.6379602 | 19.1663165 | 0.361459 |
| 11 | C | 0.1447566 | 12.26482 | 19.7368868 | 0.074019 |
| 12 | C | 0.1443788 | 12.4075908 | 16.3645822 | 0.068898 |
| 13 | C | 0.5016366 | 1.2821069 | 29.8855944 | 0.157501 |
| 14 | C | 0.1565671 | 15.6382494 | 17.9514619 | 0.160665 |
| 15 | N | 0.1444466 | 10.3621099 | 29.6543358 | -0.441797 |
| 16 | C | 0.1393615 | 11.2574256 | 35.7722559 | 0.582956 |
| 17 | N | 0.1445496 | 11.4936938 | 28.1066619 | -0.428618 |
| 18 | N | 0.1445555 | 11.5224524 | 7.68868 | -0.433881 |
| 19 | C | 0.1393043 | 12.0900202 | 12.4320055 | 0.579370 |
| 20 | N | 0.1447129 | 10.3522258 | 11.9869678 | -0.432690 |
| 21 | O | 0.1213406 | 12.6246404 | 18.8721304 | -0.361568 |
| 22 | O | 0.1213597 | 12.6309145 | 34.9388285 | -0.360170 |
| 23 | C | 0.1444429 | 12.3538665 | 19.7951151 | 0.089521 |
| 24 | C | 0.1446515 | 12.2925068 | 16.2803841 | 0.079539 |
| 25 | C | 0.9541083 | 3.0840781 | 29.9844198 | 0.164330 |
| 26 | C | 0.1565237 | 13.8243492 | 17.8695047 | 0.162944 |
| 27 | N | 0.1442411 | 10.3598365 | 29.2080422 | -0.443139 |
| 28 | C | 0.1392012 | 11.2740493 | 0.0968392 | 0.581407 |
| 29 | N | 0.1447402 | 11.4999626 | 28.1496801 | -0.430836 |
| 30 | N | 0.144376 | 11.5114387 | 7.7324869 | -0.443084 |
| 31 | C | 0.1392502 | 12.1251199 | 11.987927 | 0.580917 |
| 32 | N | 0.1450163 | 10.3454669 | 11.6215586 | -0.430303 |
| 33 | O | 0.1213452 | 12.6255255 | 18.7385081 | -0.361748 |
| 34 | O | 0.1213411 | 12.6228413 | 35.1457098 | -0.361417 |
| 35 | C | 0.1443432 | 12.4008199 | 19.7133884 | 0.079362 |
| 36 | C | 0.1447644 | 12.2666013 | 16.3012245 | 0.089718 |
| 37 | C | 1.3111917 | 4.8957043 | 30.1226065 | 0.160215 |
| 38 | C | 0.1565265 | 12.0017997 | 17.5476632 | 0.158780 |
| 39 | N | 0.1444257 | 10.3592015 | 29.2422506 | -0.436456 |
| 40 | C | 0.1392975 | 11.2643766 | 35.8036455 | 0.580046 |
| 41 | N | 0.1447247 | 11.5074619 | 28.2005611 | -0.431796 |
| 42 | N | 0.1444013 | 11.5082668 | 7.8041358 | -0.442865 |
| 43 | C | 0.1393492 | 12.0844255 | 12.2366573 | 0.583053 |
| 44 | N | 0.1448073 | 10.3594909 | 11.9325455 | -0.427411 |
| 45 | O | 0.1213562 | 12.6298415 | 18.8864233 | -0.360397 |
| 46 | O | 0.121326 | 12.6259205 | 34.9794931 | -0.361175 |
| 47 | C | 0.1445208 | 12.3577851 | 19.7145135 | 0.068962 |
| 48 | C | 0.14456 | 12.2803944 | 16.2411387 | 0.073607 |
| 49 | C | 1.5386657 | 6.7003592 | 30.3241597 | 0.163921 |
| 50 | C | 0.1564389 | 10.1889392 | 17.2607328 | 0.140657 |
| 51 | N | 0.1449429 | 10.3521056 | 29.9053989 | -0.422217 |
| 52 | C | 0.1394816 | 11.2102598 | 35.1260488 | 0.583516 |
| 53 | N | 0.1444403 | 11.5216799 | 28.2812958 | -0.442427 |
| 54 | N | 0.1446672 | 11.4985907 | 7.9045481 | -0.427191 |
| 55 | C | 0.1395717 | 11.9937989 | 12.9061024 | 0.583618 |
| 56 | N | 0.1442888 | 10.3661204 | 12.7224661 | -0.435854 |
| 57 | O | 0.1213568 | 12.6355574 | 19.1616159 | -0.361292 |
| 58 | O | 0.1213242 | 12.6335818 | 34.6357521 | -0.359059 |
| 59 | C | 0.1447638 | 12.2528608 | 19.7450185 | 0.069717 |
| 60 | C | 0.144402 | 12.3425631 | 16.1094955 | 0.070640 |
| 61 | C | 1.6176968 | 8.4919069 | 30.5442217 | 0.141667 |
| 62 | C | 0.1565151 | 8.4933605 | 17.3345106 | 0.164403 |
| 63 | N | 0.1450071 | 10.3413268 | 30.5463818 | -0.426645 |
| 64 | C | 0.1396063 | 11.2051288 | 35.055086 | 0.584436 |
| 65 | N | 0.1443521 | 11.5019433 | 28.3139076 | -0.438302 |
| 66 | N | 0.1447527 | 11.5010493 | 7.8614259 | -0.422322 |
| 67 | C | 0.1395008 | 11.9755574 | 13.1255209 | 0.585071 |
| 68 | N | 0.1442386 | 10.3530653 | 12.8324318 | -0.444637 |
| 69 | O | 0.1213279 | 12.6337422 | 19.1796483 | -0.359377 |
| 70 | O | 0.1213576 | 12.6377408 | 34.6114966 | -0.361570 |
| 71 | C | 0.1447566 | 12.2644991 | 19.7381376 | 0.074010 |
| 72 | C | 0.1443804 | 12.4073091 | 16.3666228 | 0.068878 |
| 73 | C | 1.5402469 | 10.2911552 | 30.7069662 | 0.157454 |
| 74 | C | 0.1565691 | 6.6785224 | 17.7565503 | 0.160738 |
| 75 | N | 0.1444413 | 10.3619794 | 30.34567 | -0.441952 |
| 76 | C | 0.1393582 | 11.258032 | 35.7793537 | 0.583009 |
| 77 | N | 0.1445489 | 11.4936506 | 28.1038867 | -0.428507 |
| 78 | N | 0.1445542 | 11.5226075 | 7.6868779 | -0.433933 |
| 79 | C | 0.139302 | 12.0907285 | 12.4247746 | 0.579364 |
| 80 | N | 0.1447163 | 10.3521127 | 11.9798033 | -0.432615 |
| 81 | O | 0.1213408 | 12.6245584 | 18.8685403 | -0.361576 |
| 82 | O | 0.1213599 | 12.6308658 | 34.9430582 | -0.360208 |
| 83 | C | 0.1444386 | 12.3552166 | 19.79228 | 0.089519 |
| 84 | C | 0.1446548 | 12.2921159 | 16.2789198 | 0.079550 |
| 85 | C | 1.3129534 | 12.1000062 | 30.7589076 | 0.164342 |
| 86 | C | 0.1565242 | 4.8871449 | 18.126904 | 0.162978 |
| 87 | N | 0.1442438 | 10.3598616 | 29.9469378 | -0.443109 |
| 88 | C | 0.139205 | 11.273974 | 0.0929366 | 0.581370 |
| 89 | N | 0.144742 | 11.5000839 | 28.1528089 | -0.430808 |
| 90 | N | 0.1443757 | 11.5109776 | 7.7345776 | -0.443065 |
| 91 | C | 0.1392511 | 12.1243331 | 11.992929 | 0.580906 |
| 92 | N | 0.1450141 | 10.3458925 | 11.6253842 | -0.430329 |
| 93 | O | 0.1213453 | 12.6258552 | 18.7396492 | -0.361702 |
| 94 | O | 0.1213412 | 12.6224525 | 35.1450874 | -0.361426 |
| 95 | C | 0.144344 | 12.4005394 | 19.7122866 | 0.079377 |
| 96 | C | 0.1447642 | 12.2667081 | 16.2986328 | 0.089692 |
| 97 | C | 0.5010192 | 15.6930546 | 30.5725494 | 0.163953 |
| 98 | C | 0.1564398 | 1.1948281 | 17.8341867 | 0.140543 |
| 99 | N | 0.1449379 | 10.3525279 | 29.7622433 | -0.422230 |
| 100 | C | 0.1394794 | 11.2105801 | 35.1313201 | 0.583502 |
| 101 | N | 0.1442923 | 10.3560262 | 0.4982242 | -0.442353 |
| 102 | N | 0.1449344 | 10.350392 | 24.2771839 | -0.427241 |
| 103 | C | 0.1395705 | 11.2089455 | 35.1356656 | 0.583607 |
| 104 | N | 0.1442914 | 10.3663791 | 12.7158342 | -0.435681 |
| 105 | O | 0.121357 | 12.6355062 | 19.1600117 | -0.361309 |
| 106 | O | 0.1213243 | 12.6332468 | 19.1565536 | -0.359109 |
| 107 | C | 0.1443534 | 12.3867459 | 16.1724992 | 0.069627 |
| 108 | C | 0.144753 | 12.2629767 | 19.6941462 | 0.070649 |
| 109 | C | 0.9545579 | 13.9046923 | 30.7015545 | 0.160275 |
| 110 | C | 0.1565304 | 3.0421622 | 18.2496097 | 0.158769 |
| 111 | N | 0.1444292 | 10.3594484 | 29.760171 | -0.436373 |
| 112 | C | 0.1392988 | 11.2639778 | 35.8007982 | 0.580040 |
| 113 | N | 0.1447251 | 11.5077356 | 28.2022875 | -0.431835 |
| 114 | N | 0.1444014 | 11.5084811 | 7.8054456 | -0.442940 |
| 115 | C | 0.1393489 | 12.0839055 | 12.2380025 | 0.583124 |
| 116 | N | 0.1448045 | 10.3594666 | 11.9356243 | -0.427493 |
| 117 | O | 0.1213559 | 12.6297311 | 18.8881368 | -0.360420 |
| 118 | O | 0.1213266 | 12.6258879 | 34.9813371 | -0.361180 |
| 119 | C | 0.1444414 | 12.383503 | 16.2964288 | 0.068922 |
| 120 | C | 0.1446663 | 12.2605744 | 19.7319544 | 0.073595 |
| 121 | H | 0.1102289 | 11.3175618 | 12.506736 | 0.131349 |
| 122 | H | 0.1102282 | 11.3179758 | 24.7304802 | 0.127406 |
| 123 | H | 0.1092093 | 10.7117304 | 16.2201567 | 0.167689 |
| 124 | H | 0.1104336 | 10.9006849 | 4.3613079 | 0.114544 |
| 125 | H | 0.1092264 | 10.7086051 | 19.5829274 | 0.173495 |
| 126 | H | 0.1102711 | 10.8719093 | 31.4446405 | 0.120398 |
| 127 | H | 0.1102443 | 11.3221765 | 11.6732681 | 0.124791 |
| 128 | H | 0.1102149 | 11.3153121 | 23.8693875 | 0.126589 |
| 129 | H | 0.1092133 | 10.7162591 | 16.2740961 | 0.166463 |
| 130 | H | 0.1104074 | 10.8852216 | 4.4233324 | 0.112524 |
| 131 | H | 0.1092215 | 10.6934482 | 19.6333974 | 0.168531 |
| 132 | H | 0.110323 | 10.9072633 | 31.4916689 | 0.117995 |
| 133 | H | 0.1102346 | 11.3111979 | 11.2841295 | 0.122770 |
| 134 | H | 0.1102212 | 11.3060659 | 23.5041325 | 0.122872 |
| 135 | H | 0.1103182 | 10.864907 | 4.4515661 | 0.117696 |
| 136 | H | 0.1092219 | 10.7256103 | 16.3125538 | 0.168464 |
| 137 | H | 0.1092326 | 10.6920033 | 19.6963017 | 0.166325 |
| 138 | H | 0.1103858 | 10.9100963 | 31.5410442 | 0.112831 |
| 139 | H | 0.1102351 | 11.305083 | 11.5868746 | 0.126522 |
| 140 | H | 0.1102361 | 11.3051361 | 23.8194294 | 0.125053 |
| 141 | H | 0.1102993 | 10.8872625 | 4.5288031 | 0.120341 |
| 142 | H | 0.1092315 | 10.7018195 | 16.3861615 | 0.173416 |
| 143 | H | 0.1092332 | 10.7214983 | 19.8008042 | 0.167492 |
| 144 | H | 0.1104204 | 10.886038 | 31.6495403 | 0.114677 |
| 145 | H | 0.1102265 | 11.3105745 | 12.4015077 | 0.127317 |
| 146 | H | 0.1102252 | 11.3176372 | 24.6161846 | 0.130960 |
| 147 | H | 0.1103668 | 10.9119853 | 4.5490161 | 0.119276 |
| 148 | H | 0.1092125 | 10.6933398 | 16.4096233 | 0.170639 |
| 149 | H | 0.1092166 | 10.7321851 | 19.7450592 | 0.170029 |
| 150 | H | 0.1103852 | 10.8604017 | 31.6046757 | 0.118373 |
| 151 | H | 0.110229 | 11.3174748 | 12.5044672 | 0.131318 |
| 152 | H | 0.1102284 | 11.3180493 | 24.7283771 | 0.127384 |
| 153 | H | 0.1092091 | 10.7122595 | 16.2169578 | 0.167679 |
| 154 | H | 0.1104337 | 10.9000698 | 4.3581767 | 0.114511 |
| 155 | H | 0.109226 | 10.7086189 | 19.581119 | 0.173517 |
| 156 | H | 0.11027 | 10.8719687 | 31.4427145 | 0.120411 |
| 157 | H | 0.110244 | 11.3221235 | 11.6657081 | 0.124804 |
| 158 | H | 0.1102143 | 11.3148042 | 23.8623629 | 0.126596 |
| 159 | H | 0.1092144 | 10.7165228 | 16.2770843 | 0.166456 |
| 160 | H | 0.1104065 | 10.8852285 | 4.4262479 | 0.112572 |
| 161 | H | 0.1103245 | 10.9081534 | 31.4929447 | 0.117974 |
| 162 | H | 0.1092211 | 10.6930912 | 19.635083 | 0.168528 |
| 163 | H | 0.1102344 | 11.311157 | 11.2881388 | 0.122733 |
| 164 | H | 0.1102212 | 11.3058815 | 23.5078525 | 0.122872 |
| 165 | H | 0.109222 | 10.7252481 | 16.3139008 | 0.168449 |
| 166 | H | 0.1103181 | 10.8651301 | 4.4530284 | 0.117698 |
| 167 | H | 0.1092327 | 10.6920003 | 19.6971044 | 0.166338 |
| 168 | H | 0.1103858 | 10.909969 | 31.5415162 | 0.112842 |
| 169 | H | 0.1102265 | 11.3108296 | 12.3947531 | 0.127318 |
| 170 | H | 0.1102253 | 11.3175116 | 24.6095427 | 0.130978 |
| 171 | H | 0.1103656 | 10.8640975 | 31.5696543 | 0.119322 |
| 172 | H | 0.1092129 | 10.7311735 | 19.7134757 | 0.170694 |
| 173 | H | 0.1092163 | 10.6938514 | 16.3842598 | 0.170003 |
| 174 | H | 0.1103858 | 10.9113431 | 4.5184992 | 0.118342 |
| 175 | H | 0.1102357 | 11.304923 | 11.5896263 | 0.126534 |
| 176 | H | 0.1102363 | 11.304938 | 23.8224877 | 0.125054 |
| 177 | H | 0.1092312 | 10.7101322 | 19.6159327 | 0.173406 |
| 178 | H | 0.1103004 | 10.8776934 | 31.4726071 | 0.120320 |
| 179 | H | 0.1104198 | 10.8960585 | 4.3600007 | 0.114680 |
| 180 | H | 0.1092325 | 10.7111758 | 16.2083614 | 0.167495 |

**Table S17. Coordinates of i-CB[10**]

| No | Atom | Coordinates | | | Atomic charge |
| --- | --- | --- | --- | --- | --- |
| X(nm) | Y(nm) | Z(nm) |
| 1 | C | 0.0000000 | 0.0000000 | 0.0000000 | 0.141697 |
| 2 | C | 0.160582 | 0.0000000 | 0.0000000 | 0.147006 |
| 3 | N | 0.147915 | 10.29999 | 0.0000000 | -0.422812 |
| 4 | C | 0.143111 | 11.30585 | 0.789333 | 0.579653 |
| 5 | N | 0.147588 | 10.33137 | 0.152774 | -0.437395 |
| 6 | N | 0.147888 | 10.33894 | 24.1112 | -0.430190 |
| 7 | C | 0.143268 | 11.27691 | 0.743683 | 0.581902 |
| 8 | N | 0.147549 | 10.27194 | 12.39176 | -0.438211 |
| 9 | O | 0.120249 | 12.69996 | 17.48169 | -0.361684 |
| 10 | O | 0.120116 | 12.67363 | 17.37467 | -0.359721 |
| 11 | C | 0.147259 | 12.53073 | 18.95256 | 0.064103 |
| 12 | C | 0.146993 | 12.45147 | 16.4462964 | 0.074153 |
| 13 | C | 0.516374 | 1.372484 | 29.6414253 | 0.148597 |
| 14 | C | 0.161308 | 15.41732 | 17.9282473 | 0.161084 |
| 15 | N | 0.147638 | 10.28932 | 30.24788 | -0.421565 |
| 16 | C | 0.14327 | 11.2819 | 1.016703 | 0.581306 |
| 17 | N | 0.146838 | 11.90702 | 29.08888 | -0.440371 |
| 18 | N | 0.146854 | 11.87432 | 7.522798 | -0.420895 |
| 19 | C | 0.143263 | 12.17376 | 11.1068 | 0.581576 |
| 20 | N | 0.147473 | 10.28809 | 12.39877 | -0.442358 |
| 21 | O | 0.120148 | 12.70382 | 17.2737 | -0.359839 |
| 22 | O | 0.12021 | 12.66656 | 35.26662 | -0.360821 |
| 23 | C | 0.147115 | 12.53261 | 19.2287 | 0.079368 |
| 24 | C | 0.146958 | 12.51687 | 16.50804 | 0.072322 |
| 25 | C | 0.974751 | 3.286113 | 29.58494 | 0.160125 |
| 26 | C | 0.161444 | 13.71376 | 18.2126 | 0.153097 |
| 27 | N | 0.147435 | 10.28122 | 29.95974 | -0.429570 |
| 28 | C | 0.14332 | 11.26588 | 1.33345 | 0.583514 |
| 29 | N | 0.1469 | 11.98291 | 29.14374 | -0.441592 |
| 30 | N | 0.146822 | 11.87844 | 7.175419 | -0.427538 |
| 31 | C | 0.143195 | 12.1914 | 11.11462 | 0.579220 |
| 32 | N | 0.147569 | 10.28824 | 12.08986 | -0.440698 |
| 33 | O | 0.12012 | 12.70796 | 17.09351 | -0.361588 |
| 34 | O | 0.120235 | 12.68867 | 35.13396 | -0.360334 |
| 35 | C | 0.146925 | 12.53567 | 19.56476 | 0.082959 |
| 36 | C | 0.146992 | 12.57045 | 16.74563 | 0.082702 |
| 37 | C | 1.339471 | 5.11116 | 29.50379 | 0.164038 |
| 38 | C | 0.161501 | 12.0958 | 18.14545 | 0.160687 |
| 39 | N | 0.147369 | 10.28507 | 29.49899 | -0.447978 |
| 40 | C | 0.143213 | 11.26252 | 1.422565 | 0.580581 |
| 41 | N | 0.147006 | 11.97675 | 29.03946 | -0.421255 |
| 42 | N | 0.146798 | 11.91697 | 6.736323 | -0.455919 |
| 43 | C | 0.143297 | 12.20654 | 11.1173 | 0.588451 |
| 44 | N | 0.147683 | 10.30027 | 11.88801 | -0.435166 |
| 45 | O | 0.120183 | 12.70671 | 17.12863 | -0.359881 |
| 46 | O | 0.120183 | 12.69266 | 34.9395 | -0.361537 |
| 47 | C | 0.146838 | 12.50258 | 19.60056 | 0.090174 |
| 48 | C | 0.147057 | 12.57074 | 16.87241 | 0.087818 |
| 49 | C | 1.579952 | 6.916783 | 29.50206 | 0.161017 |
| 50 | C | 0.161437 | 10.26674 | 17.79767 | 0.163033 |
| 51 | N | 0.147481 | 10.28547 | 29.3412 | -0.451170 |
| 52 | C | 0.14315 | 11.28497 | 1.197196 | 0.581438 |
| 53 | N | 0.14695 | 11.89794 | 28.71463 | -0.426404 |
| 54 | N | 0.146902 | 11.96364 | 6.786668 | -0.453732 |
| 55 | C | 0.14335 | 12.21769 | 11.08488 | 0.589927 |
| 56 | N | 0.147523 | 10.28893 | 12.09284 | -0.435513 |
| 57 | O | 0.120243 | 12.68301 | 17.32807 | -0.359447 |
| 58 | O | 0.120119 | 12.70266 | 34.9192 | -0.362560 |
| 59 | C | 0.146907 | 12.54625 | 19.37276 | 0.077431 |
| 60 | C | 0.146978 | 12.54969 | 16.59685 | 0.088650 |
| 61 | C | 1.667388 | 8.712532 | 29.60253 | 0.151468 |
| 62 | C | 0.161512 | 8.58939 | 17.46515 | 0.167769 |
| 63 | N | 0.147625 | 10.28985 | 29.68126 | -0.467828 |
| 64 | C | 0.143246 | 11.28379 | 1.003784 | 0.583988 |
| 65 | N | 0.146845 | 11.89749 | 29.06406 | -0.441041 |
| 66 | N | 0.147029 | 11.99311 | 6.877411 | -0.440804 |
| 67 | C | 0.14331 | 12.15919 | 11.47049 | 0.582492 |
| 68 | N | 0.147379 | 10.27716 | 12.36179 | -0.468953 |
| 69 | O | 0.120207 | 12.68114 | 17.32393 | -0.362172 |
| 70 | O | 0.120144 | 12.69577 | 35.02277 | -0.366927 |
| 71 | C | 0.14697 | 12.58091 | 19.19675 | 0.132336 |
| 72 | C | 0.146806 | 12.52391 | 16.36896 | 0.099753 |
| 73 | C | 1.602824 | 10.50003 | 29.77832 | 0.183065 |
| 74 | C | 0.161378 | 6.908437 | 17.37285 | 0.137040 |
| 75 | N | 0.147606 | 10.30194 | 30.04042 | -0.440093 |
| 76 | C | 0.143313 | 11.27086 | 1.053366 | 0.571418 |
| 77 | N | 0.146906 | 11.95069 | 29.31997 | -0.439731 |
| 78 | N | 0.147036 | 11.93317 | 7.094419 | -0.488141 |
| 79 | C | 0.143171 | 12.11988 | 11.52228 | 0.563328 |
| 80 | N | 0.147476 | 10.30149 | 12.33245 | -0.470751 |
| 81 | O | 0.120144 | 12.69117 | 17.27092 | -0.389110 |
| 82 | O | 0.120228 | 12.67597 | 35.22875 | -0.387008 |
| 83 | C | 0.14689 | 12.52965 | 19.24398 | 0.147223 |
| 84 | C | 0.146819 | 12.50807 | 16.61744 | 0.152215 |
| 85 | C | 1.377862 | 12.29389 | 29.98965 | 0.154375 |
| 86 | C | 0.161303 | 4.822881 | 17.46178 | 0.145001 |
| 87 | N | 0.147472 | 10.28305 | 30.04514 | -0.449644 |
| 88 | C | 0.143415 | 11.27638 | 1.245889 | 0.581040 |
| 89 | N | 0.147054 | 11.94576 | 28.85847 | -0.473950 |
| 90 | N | 0.14696 | 11.86417 | 7.346438 | -0.483578 |
| 91 | C | 0.14311 | 12.21404 | 10.88768 | 0.569980 |
| 92 | N | 0.14765 | 10.30103 | 12.09683 | -0.425463 |
| 93 | O | 0.120152 | 12.66978 | 17.22113 | -0.355904 |
| 94 | O | 0.120207 | 12.69766 | 35.18141 | -0.360267 |
| 95 | C | 0.146793 | 12.50031 | 19.45218 | 0.096211 |
| 96 | C | 0.146942 | 12.5539 | 16.79136 | 0.072882 |
| 97 | C | 0.517973 | 13.61544 | 30.22764 | 0.157528 |
| 98 | C | 0.162594 | 0.819847 | 35.87907 | 0.160714 |
| 99 | N | 0.148171 | 10.28856 | 5.868216 | -0.435030 |
| 100 | C | 0.141467 | 11.29708 | 0.129236 | 0.576026 |
| 101 | N | 0.147736 | 10.30421 | 35.70757 | -0.433596 |
| 102 | N | 0.148148 | 10.27581 | 11.53604 | -0.435895 |
| 103 | C | 0.141655 | 11.29683 | 0.261587 | 0.580377 |
| 104 | N | 0.147717 | 10.32965 | 23.91497 | -0.430412 |
| 105 | O | 0.121565 | 12.60557 | 18.10575 | -0.359396 |
| 106 | O | 0.121533 | 12.59663 | 17.94274 | -0.361622 |
| 107 | C | 0.146043 | 12.29066 | 16.86115 | 0.068603 |
| 108 | C | 0.146032 | 12.36221 | 18.89829 | 0.079709 |
| 109 | C | 1.000274 | 14.00784 | 30.22766 | 0.165675 |
| 110 | C | 0.16075 | 2.768731 | 17.38776 | 0.161088 |
| 111 | N | 0.147669 | 10.32789 | 29.94826 | -0.448835 |
| 112 | C | 0.143274 | 11.26898 | 1.079683 | 0.585413 |
| 113 | N | 0.147128 | 11.90737 | 28.72135 | -0.439541 |
| 114 | N | 0.14706 | 11.90612 | 7.038871 | -0.446081 |
| 115 | C | 0.143267 | 12.23486 | 10.9819 | 0.579457 |
| 116 | N | 0.147723 | 10.31781 | 12.0221 | -0.425706 |
| 117 | O | 0.120213 | 12.66994 | 17.23995 | -0.360600 |
| 118 | O | 0.120124 | 12.73642 | 34.92502 | -0.361015 |
| 119 | C | 0.149135 | 12.98954 | 18.32563 | 0.079697 |
| 120 | C | 0.148925 | 12.9732 | 18.3878 | 0.087384 |
| 121 | H | 0.111767 | 11.3791 | 12.14158 | 0.127484 |
| 122 | H | 0.11173 | 11.35714 | 24.28173 | 0.130211 |
| 123 | H | 0.113437 | 10.67071 | 16.98419 | 0.173367 |
| 124 | H | 0.112273 | 10.69883 | 5.232502 | 0.121425 |
| 125 | H | 0.113416 | 10.69215 | 19.60089 | 0.168001 |
| 126 | H | 0.11228 | 10.70723 | 31.37998 | 0.118135 |
| 127 | H | 0.111679 | 11.34124 | 12.13163 | 0.129248 |
| 128 | H | 0.11166 | 11.36101 | 24.3051 | 0.126328 |
| 129 | H | 0.113475 | 10.66109 | 17.02665 | 0.166437 |
| 130 | H | 0.112356 | 10.66902 | 5.276538 | 0.116145 |
| 131 | H | 0.113483 | 10.68557 | 19.25381 | 0.173304 |
| 132 | H | 0.112272 | 10.70958 | 31.02831 | 0.117191 |
| 133 | H | 0.111579 | 11.35459 | 11.83037 | 0.125787 |
| 134 | H | 0.11161 | 11.35652 | 23.99665 | 0.128448 |
| 135 | H | 0.112336 | 10.68313 | 5.188456 | 0.106900 |
| 136 | H | 0.113559 | 10.67472 | 16.93128 | 0.168065 |
| 137 | H | 0.113511 | 10.6747 | 18.82895 | 0.172972 |
| 138 | H | 0.112298 | 10.70564 | 30.58372 | 0.117278 |
| 139 | H | 0.111617 | 11.35569 | 11.64191 | 0.125755 |
| 140 | H | 0.111604 | 11.35658 | 23.80118 | 0.126567 |
| 141 | H | 0.112263 | 10.71109 | 4.865503 | 0.113104 |
| 142 | H | 0.113467 | 10.68412 | 16.63881 | 0.165914 |
| 143 | H | 0.1135 | 10.66147 | 18.88811 | 0.167279 |
| 144 | H | 0.112307 | 10.6888 | 30.63905 | 0.116547 |
| 145 | H | 0.111573 | 11.35333 | 11.82323 | 0.126561 |
| 146 | H | 0.11159 | 11.35541 | 24.00157 | 0.127850 |
| 147 | H | 0.112284 | 10.70853 | 5.208972 | 0.118978 |
| 148 | H | 0.11349 | 10.67626 | 16.97603 | 0.172801 |
| 149 | H | 0.113526 | 10.66947 | 18.98878 | 0.167004 |
| 150 | H | 0.112351 | 10.67885 | 30.73694 | 0.111550 |
| 151 | H | 0.111594 | 11.358 | 12.12894 | 0.133428 |
| 152 | H | 0.111603 | 11.35855 | 24.2914 | 0.144519 |
| 153 | H | 0.113542 | 10.66219 | 17.21594 | 0.159319 |
| 154 | H | 0.112313 | 10.69467 | 5.471788 | 0.114832 |
| 155 | H | 0.113538 | 10.68282 | 19.18183 | 0.165521 |
| 156 | H | 0.112313 | 10.70493 | 30.94265 | 0.149514 |
| 157 | H | 0.111637 | 11.35821 | 12.07916 | 0.168480 |
| 158 | H | 0.111592 | 11.34847 | 24.25616 | 0.166010 |
| 159 | H | 0.113478 | 10.66713 | 16.76912 | 0.157765 |
| 160 | H | 0.112292 | 10.70066 | 5.004883 | 0.116712 |
| 161 | H | 0.112232 | 10.72675 | 31.20134 | 0.125608 |
| 162 | H | 0.113429 | 10.68954 | 19.41301 | 0.158384 |
| 163 | H | 0.111669 | 11.35426 | 11.80686 | 0.147356 |
| 164 | H | 0.111688 | 11.3418 | 23.99642 | 0.137251 |
| 165 | H | 0.113422 | 10.68812 | 16.6276 | 0.167144 |
| 166 | H | 0.112317 | 10.70817 | 4.851437 | 0.116186 |
| 167 | H | 0.113467 | 10.68086 | 19.13665 | 0.169963 |
| 168 | H | 0.112298 | 10.71116 | 30.8997 | 0.121431 |
| 169 | H | 0.111598 | 11.43807 | 23.60131 | 0.126232 |
| 170 | H | 0.11155 | 11.42909 | 11.77707 | 0.125804 |
| 171 | H | 0.112232 | 10.85554 | 32.55877 | 0.119751 |
| 172 | H | 0.113034 | 10.88367 | 20.68526 | 0.174485 |
| 173 | H | 0.11306 | 10.8462 | 15.79578 | 0.168354 |
| 174 | H | 0.11232 | 10.83125 | 3.927838 | 0.112999 |
| 175 | H | 0.111693 | 11.3603 | 11.8666 | 0.125350 |
| 176 | H | 0.11175 | 11.38574 | 23.99894 | 0.128362 |
| 177 | H | 0.113033 | 10.66609 | 12.92277 | 0.173033 |
| 178 | H | 0.112334 | 10.72389 | 24.59868 | 0.118051 |
| 179 | H | 0.112333 | 10.74572 | 10.32977 | 0.110727 |
| 180 | H | 0.11314 | 10.64797 | 22.04489 | 0.165830 |

**Table S18. Coordinates of i(1,6)-CB[10**]

| No | Atom | Coordinates | | | Atomic charge |
| --- | --- | --- | --- | --- | --- |
| X(nm) | Y(nm) | Z(nm) |
| 1 | C | 0.0000000 | 0.0000000 | 0.0000000 | **0-**0.151011**0** |
| 2 | C | 0.1565864 | 0.0000000 | 0.0000000 | 0.166293 |
| 3 | N | 0.1451125 | 10.3160016 | 0.0000000 | -0.456317 |
| 4 | C | 0.1391559 | 11.2521333 | 35.06456 | 0.583915 |
| 5 | N | 0.1442928 | 10.3511072 | 0.7286041 | -0.451378 |
| 6 | N | 0.1452187 | 10.3298737 | 24.5435249 | -0.431460 |
| 7 | C | 0.1394108 | 11.2283914 | 35.1839738 | 0.577646 |
| 8 | N | 0.1444057 | 10.3576907 | 12.7883235 | -0.474543 |
| 9 | O | 0.1213285 | 12.6540436 | 19.0204781 | -0.360830 |
| 10 | O | 0.1215427 | 12.6300913 | 18.8988209 | -0.369845 |
| 11 | C | 0.1440724 | 12.2790002 | 19.1792403 | 0.122733 |
| 12 | C | 0.1446434 | 12.4242581 | 16.0816799 | 0.105670 |
| 13 | C | 0.4798987 | 2.6068349 | 29.6536454 | 0.183095 |
| 14 | C | 0.1557493 | 16.9837878 | 0.7210652 | 0.131432 |
| 15 | N | 0.1440868 | 10.2808895 | 9.0900576 | -0.436204 |
| 16 | C | 0.1389775 | 11.0973174 | 33.7332969 | 0.570073 |
| 17 | N | 0.1457448 | 11.402782 | 26.9780711 | -0.437653 |
| 18 | N | 0.1456387 | 11.1436471 | 5.2923286 | -0.489709 |
| 19 | C | 0.1398027 | 11.9256244 | 20.1980424 | 0.565827 |
| 20 | N | 0.1471018 | 10.1173546 | 25.7230654 | -0.468689 |
| 21 | O | 0.1219134 | 12.5328353 | 19.8251156 | -0.387621 |
| 22 | O | 0.121883 | 12.5929304 | 2.5285565 | -0.387048 |
| 23 | C | 0.1465456 | 12.5242566 | 18.3394532 | 0.150288 |
| 24 | C | 0.1462276 | 12.5277658 | 18.2293205 | 0.150453 |
| 25 | C | 0.9665043 | 1.9194827 | 30.1094346 | 0.159609 |
| 26 | C | 0.1562612 | 13.6295658 | 22.3727485 | 0.141322 |
| 27 | N | 0.1443359 | 10.3444518 | 28.5876834 | -0.447701 |
| 28 | C | 0.1392599 | 11.2947524 | 0.5437882 | 0.582037 |
| 29 | N | 0.143815 | 11.2163464 | 33.2319326 | -0.481574 |
| 30 | N | 0.1437517 | 11.3562137 | 2.0914446 | -0.481917 |
| 31 | C | 0.139103 | 12.3355394 | 9.4914252 | 0.571869 |
| 32 | N | 0.1454442 | 10.3004929 | 11.2532597 | -0.429264 |
| 33 | O | 0.1212214 | 12.6612199 | 18.3315627 | -0.356861 |
| 34 | O | 0.1213609 | 12.6110531 | 0.0062649 | -0.359745 |
| 35 | C | 0.1444009 | 12.4623416 | 19.4966011 | 0.097558 |
| 36 | C | 0.1448679 | 12.343008 | 16.804198 | 0.075175 |
| 37 | C | 1.300973 | 3.6336086 | 28.0321194 | 0.148717 |
| 38 | C | 0.156323 | 11.1545316 | 19.5143806 | 0.162789 |
| 39 | N | 0.1439825 | 10.3421928 | 27.822971 | -0.453071 |
| 40 | C | 0.139122 | 11.2745669 | 0.7819676 | 0.586337 |
| 41 | N | 0.1448421 | 11.5211024 | 27.8549582 | -0.430739 |
| 42 | N | 0.144199 | 11.5379951 | 7.7461141 | -0.450649 |
| 43 | C | 0.1391998 | 12.1930694 | 10.7076131 | 0.581440 |
| 44 | N | 0.1455185 | 10.2956435 | 10.918861 | -0.425219 |
| 45 | O | 0.1212985 | 12.6333639 | 18.3469121 | -0.359347 |
| 46 | O | 0.1213619 | 12.611402 | 35.6241542 | -0.360829 |
| 47 | C | 0.1442805 | 12.4677549 | 19.5747865 | 0.082935 |
| 48 | C | 0.1450027 | 12.2725437 | 16.6076488 | 0.089589 |
| 49 | C | 1.4590951 | 5.611427 | 27.6352105 | 0.156352 |
| 50 | C | 0.1563929 | 9.2651435 | 17.8535093 | 0.160190 |
| 51 | N | 0.1441774 | 10.3555133 | 27.286042 | -0.449739 |
| 52 | C | 0.1391338 | 11.2772599 | 0.3510165 | 0.579497 |
| 53 | N | 0.1447688 | 11.5230209 | 28.0436099 | -0.429790 |
| 54 | N | 0.1441861 | 11.521267 | 7.7733688 | -0.450846 |
| 55 | C | 0.1392326 | 12.1656501 | 11.3707548 | 0.582979 |
| 56 | N | 0.1451648 | 10.3316244 | 11.3402735 | -0.429421 |
| 57 | O | 0.1213355 | 12.6400347 | 18.59841 | -0.357640 |
| 58 | O | 0.1213445 | 12.6161832 | 35.2919525 | -0.362394 |
| 59 | C | 0.1445924 | 12.4403678 | 19.5636077 | 0.085934 |
| 60 | C | 0.1447698 | 12.2523433 | 16.4304413 | 0.083314 |
| 61 | C | 1.460218 | 7.5877824 | 27.9057206 | 0.151001 |
| 62 | C | 0.1565858 | 7.5883842 | 16.1496988 | 0.166313 |
| 63 | N | 0.1451101 | 10.3161637 | 27.9047318 | -0.456371 |
| 64 | C | 0.1391537 | 11.2522289 | 35.0668631 | 0.583902 |
| 65 | N | 0.1443547 | 11.5705995 | 28.244862 | -0.451318 |
| 66 | N | 0.1445455 | 11.5073713 | 7.9862888 | -0.431440 |
| 67 | C | 0.1394089 | 12.0007186 | 12.4853613 | 0.577645 |
| 68 | N | 0.1444058 | 10.3579352 | 12.7845285 | -0.474551 |
| 69 | O | 0.1213289 | 12.6540072 | 19.0213135 | -0.360876 |
| 70 | O | 0.1215425 | 12.6300062 | 34.6041171 | -0.369880 |
| 71 | C | 0.1440713 | 12.2789745 | 19.1794967 | 0.122792 |
| 72 | C | 0.1446456 | 12.4244278 | 16.0828978 | 0.105703 |
| 73 | C | 1.218903 | 9.1728616 | 28.7421257 | 0.182964 |
| 74 | C | 0.1557517 | 7.898155 | 15.5269535 | 0.131671 |
| 75 | N | 0.1440817 | 10.2810546 | 25.6861539 | -0.436506 |
| 76 | C | 0.1389721 | 11.0984124 | 33.7363136 | 0.570136 |
| 77 | N | 0.1457444 | 11.4023557 | 26.9765564 | -0.437627 |
| 78 | N | 0.14564 | 11.1440051 | 5.2930747 | -0.489730 |
| 79 | C | 0.139808 | 11.9251305 | 20.1946417 | 0.565907 |
| 80 | N | 0.1471001 | 10.117112 | 25.7208289 | -0.468759 |
| 81 | O | 0.1219143 | 12.5329288 | 19.8219561 | -0.387682 |
| 82 | O | 0.121883 | 2.5927996 | 2.5309018 | -0.387065 |
| 83 | C | 0.1465441 | 12.5260484 | 18.3321491 | 0.150433 |
| 84 | C | 0.1462193 | 12.5290413 | 18.2193385 | 0.150495 |
| 85 | C | 1.2576186 | 11.2384494 | 29.7681112 | 0.159546 |
| 86 | C | 0.1562633 | 5.7782846 | 16.6644767 | 0.141386 |
| 87 | N | 0.1443345 | 0.344224 | 30.7486424 | -0.447746 |
| 88 | C | 0.1392561 | 11.2947425 | 0.5465497 | 0.582029 |
| 89 | N | 0.1438179 | 1.2160663 | 33.2444773 | -0.481602 |
| 90 | N | 0.1437539 | 11.3568717 | 2.1027433 | -0.481811 |
| 91 | C | 0.1391032 | 12.336323 | 9.4844276 | 0.571858 |
| 92 | N | 0.1454468 | 0.3001132 | 11.2502059 | -0.429281 |
| 93 | O | 0.1212216 | 2.6610771 | 18.3306568 | -0.356820 |
| 94 | O | 0.1213608 | 2.6112017 | 0.0098983 | -0.359752 |
| 95 | C | 0.144404 | 12.4634337 | 19.4939943 | 0.097541 |
| 96 | C | 0.1448692 | 12.3427174 | 16.804856 | 0.075191 |
| 97 | C | 0.5048014 | 15.3068851 | 30.5734393 | 0.156256 |
| 98 | C | 0.1563917 | 1.3956877 | 18.0628814 | 0.160114 |
| 99 | N | 0.1441743 | 0.3552316 | 29.9288593 | -0.449770 |
| 100 | C | 0.1391336 | 11.2773572 | 0.3576194 | 0.579509 |
| 101 | N | 0.1450638 | 0.3229727 | 35.1323977 | -0.429693 |
| 102 | N | 0.1441495 | 0.3505036 | 22.9328773 | -0.450842 |
| 103 | C | 0.1392297 | 11.2806276 | 0.399282 | 0.582935 |
| 104 | N | 0.1451692 | 0.3311159 | 11.3330626 | -0.429323 |
| 105 | O | 0.1213347 | 2.6400608 | 18.5952164 | -0.357656 |
| 106 | O | 0.1213447 | 2.6161271 | 18.5219944 | -0.362329 |
| 107 | C | 0.1443548 | 12.467583 | 16.6002023 | 0.085987 |
| 108 | C | 0.1445434 | 12.3249681 | 19.5653358 | 0.083241 |
| 109 | C | 0.946207 | 13.2966656 | 30.28434 | 0.148717 |
| 110 | C | 0.1563239 | 3.4729038 | 17.5384673 | 0.162720 |
| 111 | N | 0.1439855 | 0.3421817 | 30.1471473 | -0.453069 |
| 112 | C | 0.1391237 | 11.2744266 | 0.7814649 | 0.586343 |
| 113 | N | 0.1448404 | 11.5214684 | 27.856585 | -0.430715 |
| 114 | N | 0.1441982 | 11.5378609 | 7.7472091 | -0.450646 |
| 115 | C | 0.1391994 | 12.1927644 | 10.7088475 | 0.581428 |
| 116 | N | 0.1455178 | 10.2957496 | 10.9196888 | -0.425163 |
| 117 | O | 0.1212985 | 12.6330589 | 18.3468539 | -0.359327 |
| 118 | O | 0.1213615 | 12.6113636 | 35.6245001 | -0.360842 |
| 119 | C | 0.1447704 | 12.2820179 | 16.5298201 | 0.082890 |
| 120 | C | 0.1441841 | 12.4283172 | 19.6635586 | 0.089589 |
| 121 | H | 0.1101382 | 11.3257495 | 12.6539581 | 0.133942 |
| 122 | H | 0.1098863 | 11.3562122 | 24.7668643 | 0.146851 |
| 123 | H | 0.1090996 | 10.861512 | 15.1527768 | 0.161263 |
| 124 | H | 0.1100333 | 10.8085473 | 3.296813 | 0.116050 |
| 125 | H | 0.1095987 | 10.5846188 | 17.5951674 | 0.163810 |
| 126 | H | 0.1096308 | 11.2556018 | 29.442533 | 0.150431 |
| 127 | H | 0.1093357 | 11.3474978 | 25.869522 | 0.167847 |
| 128 | H | 0.1092746 | 11.4031978 | 13.824086 | 0.165624 |
| 129 | H | 0.1091487 | 10.8135903 | 21.2582389 | 0.156287 |
| 130 | H | 0.1100582 | 11.0260281 | 9.4252733 | 0.117116 |
| 131 | H | 0.1092612 | 10.7115948 | 14.1840951 | 0.158487 |
| 132 | H | 0.1097994 | 11.0102506 | 26.0113314 | 0.125447 |
| 133 | H | 0.1099401 | 11.374132 | 10.9815302 | 0.148320 |
| 134 | H | 0.1100918 | 11.3342787 | 23.1422151 | 0.138996 |
| 135 | H | 0.1101942 | 10.8249672 | 4.149306 | 0.113620 |
| 136 | H | 0.109227 | 10.7494519 | 15.9964935 | 0.165985 |
| 137 | H | 0.1092261 | 10.6505082 | 19.6475601 | 0.173102 |
| 138 | H | 0.1101347 | 10.933869 | 31.5094232 | 0.120496 |
| 139 | H | 0.1101495 | 11.3271376 | 10.6236344 | 0.131749 |
| 140 | H | 0.110162 | 11.3328084 | 22.8167118 | 0.130312 |
| 141 | H | 0.110209 | 10.818339 | 4.3320006 | 0.115693 |
| 142 | H | 0.1092254 | 10.7479464 | 16.1778906 | 0.171917 |
| 143 | H | 0.1092244 | 10.6587659 | 19.6790665 | 0.165101 |
| 144 | H | 0.1102866 | 10.9347145 | 31.5285204 | 0.114048 |
| 145 | H | 0.1101845 | 11.3328396 | 11.0407214 | 0.130168 |
| 146 | H | 0.1101849 | 11.3183206 | 23.2253774 | 0.129189 |
| 147 | H | 0.1101108 | 10.8639155 | 4.5216816 | 0.119512 |
| 148 | H | 0.1092416 | 10.6852382 | 16.3718524 | 0.170572 |
| 149 | H | 0.1092343 | 10.7007061 | 19.8791158 | 0.170831 |
| 150 | H | 0.1103887 | 10.8943588 | 31.7334417 | 0.109183 |
| 151 | H | 0.1101387 | 11.3255758 | 12.6498474 | 0.133970 |
| 152 | H | 0.1098864 | 11.3561896 | 24.7629572 | 0.146856 |
| 153 | H | 0.1090995 | 10.8620233 | 15.1512617 | 0.161257 |
| 154 | H | 0.1100345 | 10.8080771 | 3.2950439 | 0.116037 |
| 155 | H | 0.1095985 | 10.5842957 | 17.5964018 | 0.163805 |
| 156 | H | 0.1096306 | 11.2555898 | 29.4437659 | 0.150407 |
| 157 | H | 0.1093362 | 11.3473155 | 25.8676137 | 0.167846 |
| 158 | H | 0.1092743 | 11.4039727 | 13.8219692 | 0.165630 |
| 159 | H | 0.1091494 | 10.814457 | 21.2721368 | 0.156261 |
| 160 | H | 0.1100583 | 11.0258721 | 9.4387688 | 0.117152 |
| 161 | H | 0.1097998 | 11.0107339 | 26.0231609 | 0.125442 |
| 162 | H | 0.1092607 | 10.710999 | 14.1957074 | 0.158499 |
| 163 | H | 0.1099398 | 11.3741935 | 10.9781847 | 0.148304 |
| 164 | H | 0.1100915 | 11.3341739 | 23.139268 | 0.138976 |
| 165 | H | 0.1092263 | 10.7493133 | 15.9980077 | 0.165995 |
| 166 | H | 0.1101937 | 10.8246751 | 4.1511723 | 0.113614 |
| 167 | H | 0.1092268 | 10.6503738 | 19.6488015 | 0.173094 |
| 168 | H | 0.1101346 | 10.9341436 | 31.5104104 | 0.120452 |
| 169 | H | 0.1101837 | 11.3331869 | 11.0332338 | 0.130165 |
| 170 | H | 0.1101841 | 11.3184182 | 23.2179639 | 0.129221 |
| 171 | H | 0.1101099 | 10.8869469 | 31.4134602 | 0.119515 |
| 172 | H | 0.1092414 | 10.6782258 | 19.5549553 | 0.170556 |
| 173 | H | 0.1092341 | 10.7157693 | 16.0471801 | 0.170856 |
| 174 | H | 0.1103904 | 10.8858635 | 4.1902793 | 0.109193 |
| 175 | H | 0.1101494 | 11.3267133 | 10.6244844 | 0.131761 |
| 176 | H | 0.110162 | 11.3325084 | 22.8174672 | 0.130329 |
| 177 | H | 0.1092259 | 10.6604849 | 19.6796207 | 0.171912 |
| 178 | H | 0.1102098 | 10.9487313 | 31.546285 | 0.115690 |
| 179 | H | 0.1102862 | 10.8472672 | 4.2836828 | 0.114065 |
| 180 | H | 0.109224 | 10.742611 | 16.1333694 | 0.165102 |
